# Supplementary material for: Pan-cancer analysis of oncogenic TNFAIP2 identifying its prognostic value and immunological function in acute myeloid leukemia
Source: BMC Cancer. 2022 Oct 15;22:1068. doi: 10.1186/s12885-022-10155-9 (PMC9571470; doi:10.1186/s12885-022-10155-9)
Supplement: Supplementary file 1 — Additional file 1: Supplementary Table S1. Statistical results of Student’s T-test for TNFAIP2 expression level among different subtypes of AML patients from TCGA cohort in the distribution of FAB classifications. The results were analyzed by UALCAN. Supplementary Table S2. Statistical results of Student’s T-test for TNFAIP2 expression level among different subtypes of AML patients in the microarray data of GSE14468 from the GEO database in the distribution of FAB classifications. Supplementary Table S3. The co-expressed genes associated with TNFAIP2 expression in AML. Supplementary Table S4. The differentially expressed genes between the TNFAIP2high and TNFAIP2low group of AML patients. Supplementary Table S5. The overlapping genes between significantly co-expressed genes and significantly differentially expressed genes of TNFAIP2 in AML. [file 12885_2022_10155_MOESM1_ESM.xlsx]

## Sheet: Table S1
Student’s T-test for TNFAIP2 expression level among different subtypes of AML patients from TCGA cohort in the distribution of FAB classifications.
Comparison	P value
M0-vs-M1	0.654
M0-vs-M2	0.42
M0-vs-M3	0.033
M0-vs-M4	0.005
M0-vs-M5	0.007
M0-vs-M6	0.823
M0-vs-M7	0.52
M1-vs-M2	0.054
M1-vs-M3	< 0.001
M1-vs-M4	< 0.001
M1-vs-M5	0.009
M1-vs-M6	0.664
M1-vs-M7	0.349
M2-vs-M3	0.028
M2-vs-M4	< 0.001
M2-vs-M5	0.002
M2-vs-M6	0.905
M2-vs-M7	0.667
M3-vs-M4	< 0.001
M3-vs-M5	< 0.001
M3-vs-M6	0.188
M3-vs-M7	0.381
M4-vs-M5	0.213
M4-vs-M6	0.165
M4-vs-M7	0.044
M5-vs-M6	0.259
M5-vs-M7	0.001
M6-vs-M7	0.561

## Sheet: Table S2
Student’s t-test for TNFAIP2 expression level among different subtypes of AML patients in the microarray data of GSE14468 from the GEO database in the distribution of FAB classifications.
Comparison	P value
M0-vs-M1	0.935
M0-vs-M2	0.806
M0-vs-M3	0.12
M0-vs-M4	< 0.001
M0-vs-M5	< 0.001
M0-vs-M6	0.31
M1-vs-M2	0.539
M1-vs-M3	0.037
M1-vs-M4	< 0.001
M1-vs-M5	< 0.001
M1-vs-M6	0.271
M2-vs-M3	0.013
M2-vs-M4	< 0.001
M2-vs-M5	< 0.001
M2-vs-M6	0.189
M3-vs-M4	< 0.001
M3-vs-M5	< 0.001
M3-vs-M6	0.973
M4-vs-M5	0.386
M4-vs-M6	< 0.001
M5-vs-M6	< 0.001

## Sheet: Table S3
The co-expressed genes associated with TNFAIP expression in AML
Query	Statistic	P-value	FDR (BH)	Event_SD	Event_TD
A1BG	-0.0929201	0.224006	0.33124	173	173
A1CF	-0.0804055	0.29298	0.410155	173	3
A2BP1	0.0198799	0.795165	0.86047	173	12
A2LD1	0.187811	0.0133451	0.0313904	173	173
A2ML1	0.0157606	0.836941	0.891441	173	164
A2M	-0.018698	0.807098	0.868831	173	169
A4GALT	-0.261804	0.000502506	0.00175327	173	166
A4GNT	0.115085	0.131619	0.214724	173	108
AAA1	0.14312	0.0603144	0.11294	173	3
AAAS	0.0395538	0.60538	0.710722	173	173
AACSL	-0.0043672	0.954525	0.969176	173	28
AACS	0.0646495	0.398082	0.520639	173	173
AADACL2	0.0203944	0.789986	0.856772	173	29
AADACL3	-0.0249627	0.744422	0.821839	173	7
AADACL4	-0.0568532	0.457502	0.577797	173	3
AADAC	-0.0470382	0.538855	0.652044	173	53
AADAT	-0.104487	0.171284	0.266554	173	146
AAGAB	0.128529	0.0919359	0.160529	173	173
AAK1	0.0906693	0.235477	0.345158	173	173
AAMP	0.173182	0.0226919	0.0494855	173	173
AANAT	0.482273	1.83478e-11	3.63369e-10	173	167
AARS2	-0.135204	0.0761297	0.137343	173	173
AARSD1	-0.35832	1.29506e-06	8.56097e-06	173	173
AARS	-0.329061	9.8477e-06	5.28909e-05	173	173
AASDHPPT	-0.381779	2.18596e-07	1.74589e-06	173	173
AASDH	-0.296447	7.48626e-05	0.000322536	173	173
AASS	-0.0537429	0.482516	0.601075	173	170
AATF	0.0569506	0.45673	0.577248	173	173
AATK	0.492261	6.04058e-12	1.31957e-10	173	173
ABAT	0.539778	1.81157e-14	6.76228e-13	173	173
ABCA10	0.0785953	0.304018	0.422807	173	168
ABCA11P	-0.399519	5.17365e-08	4.78218e-07	173	171
ABCA12	-0.203962	0.00711092	0.0182205	173	134
ABCA13	-0.0413145	0.589405	0.696612	173	171
ABCA17P	-0.113898	0.135674	0.220195	173	138
ABCA1	0.061893	0.418544	0.540853	173	173
ABCA2	-0.1118	0.143075	0.229904	173	173
ABCA3	-0.143754	0.0591739	0.111166	173	173
ABCA4	-0.0611267	0.42434	0.546528	173	51
ABCA5	0.026266	0.731576	0.812212	173	173
ABCA6	0.197926	0.00904599	0.022446	173	169
ABCA7	0.499888	2.5235e-12	6.00699e-11	173	173
ABCA8	-0.117579	0.123402	0.203953	173	116
ABCA9	0.298611	6.59126e-05	0.000288384	173	168
ABCB10	-0.327868	1.06517e-05	5.68325e-05	173	173
ABCB11	0.060431	0.429641	0.551711	173	101
ABCB1	-0.321134	1.64815e-05	8.37994e-05	173	173
ABCB4	-0.111353	0.144691	0.231963	173	166
ABCB5	-0.113746	0.1362	0.220863	173	84
ABCB6	0.0244308	0.749685	0.826012	173	173
ABCB7	-0.301397	5.58658e-05	0.000248168	173	173
ABCB8	0.142624	0.0612201	0.114471	173	173
ABCB9	-0.16272	0.0324347	0.0672055	173	173
ABCC10	0.308451	3.64724e-05	0.000169693	173	173
ABCC11	0.0887521	0.245568	0.356669	173	104
ABCC12	-0.0608582	0.426381	0.548567	173	3
ABCC13	-0.142	0.0623733	0.116291	173	129
ABCC1	-0.292941	9.18143e-05	0.000386578	173	173
ABCC2	0.0716497	0.348873	0.470095	173	173
ABCC3	0.51621	3.61753e-13	1.04228e-11	173	168
ABCC4	-0.0372179	0.626865	0.728925	173	173
ABCC5	-0.154443	0.0424743	0.0844276	173	173
ABCC6P1	0.137113	0.0720386	0.131107	173	102
ABCC6P2	0.131019	0.0857579	0.151592	173	143
ABCC6	0.0979488	0.199822	0.302328	173	173
ABCC8	-0.31998	1.77435e-05	8.93514e-05	173	59
ABCC9	-0.195505	0.00994464	0.0244104	173	132
ABCD1	0.477494	3.08285e-11	5.88952e-10	173	173
ABCD2	-0.0540316	0.480164	0.599065	173	172
ABCD3	-0.0279329	0.715255	0.799947	173	173
ABCD4	-0.206463	0.00642356	0.0166723	173	173
ABCE1	-0.472853	5.06448e-11	9.29188e-10	173	173
ABCF1	-0.0537379	0.482558	0.601088	173	173
ABCF2	-0.102617	0.179115	0.276476	173	173
ABCF3	0.135809	0.0748136	0.135347	173	173
ABCG1	-0.12446	0.102784	0.175568	173	173
ABCG2	-0.191043	0.0118093	0.0283665	173	165
ABCG4	0.0431178	0.573247	0.682074	173	48
ABCG5	-0.0381119	0.618604	0.721822	173	104
ABCG8	0.0598906	0.433786	0.555383	173	93
ABHD10	-0.344393	3.48971e-06	2.09339e-05	173	173
ABHD11	0.535998	2.9749e-14	1.06158e-12	173	173
ABHD12B	-0.132539	0.0821557	0.146302	173	172
ABHD12	0.285798	0.000138046	0.000559198	173	173
ABHD13	0.040514	0.596644	0.703031	173	173
ABHD14A	-0.0192733	0.801283	0.864925	173	173
ABHD14B	0.0726854	0.341933	0.462892	173	173
ABHD15	0.154231	0.0427629	0.0848711	173	173
ABHD1	0.145871	0.0554945	0.105427	173	173
ABHD2	0.370476	5.24267e-07	3.82587e-06	173	173
ABHD3	0.101365	0.184509	0.283104	173	173
ABHD4	-0.277582	0.000217749	0.000839236	173	173
ABHD5	0.1929	0.0109989	0.0266352	173	173
ABHD6	0.491939	6.26419e-12	1.35711e-10	173	173
ABHD8	0.525191	1.18772e-13	3.78668e-12	173	173
ABI1	-0.020724	0.786672	0.854513	173	173
ABI2	-0.110161	0.149067	0.237608	173	173
ABI3BP	-0.159922	0.0355757	0.0725694	173	170
ABI3	0.587654	1.90794e-17	1.26641e-15	173	173
ABL1	-0.361971	9.90916e-07	6.74767e-06	173	173
ABL2	-0.404691	3.34437e-08	3.22625e-07	173	173
ABLIM1	-0.150133	0.0486597	0.09452	173	173
ABLIM2	0.194428	0.0103691	0.0253149	173	152
ABLIM3	0.150325	0.0483687	0.0940299	173	160
ABO	-0.0188268	0.805795	0.868294	173	161
ABP1	0.0527878	0.490344	0.607827	173	167
ABRA	0.100391	0.188784	0.28832	173	173
ABR	0.49814	3.08801e-12	7.14949e-11	173	173
ABT1	-0.0844436	0.269331	0.383789	173	173
ABTB1	0.228553	0.00249057	0.00725751	173	173
ABTB2	-0.175871	0.0206388	0.0455961	173	173
ACAA1	0.414307	1.45672e-08	1.54388e-07	173	173
ACAA2	-0.135132	0.0762892	0.137555	173	173
ACACA	-0.336429	6.02326e-06	3.41119e-05	173	173
ACACB	-0.179455	0.0181542	0.0408282	173	173
ACAD10	-0.0174457	0.819789	0.878755	173	173
ACAD11	-0.307621	3.83727e-05	0.000177472	173	173
ACAD8	-0.093447	0.221379	0.328179	173	173
ACAD9	-0.123562	0.10531	0.179184	173	173
ACADL	-0.0449132	0.557368	0.668086	173	51
ACADM	-0.423817	6.23853e-09	7.22614e-08	173	173
ACADSB	-0.526347	1.02664e-13	3.30565e-12	173	173
ACADS	0.161365	0.0339256	0.0697374	173	173
ACADVL	0.21995	0.00364088	0.010127	173	173
ACAN	-0.0122079	0.873344	0.914489	173	128
ACAP1	0.0785897	0.304052	0.422825	173	173
ACAP2	0.185492	0.0145527	0.03385	173	173
ACAP3	0.262385	0.000487709	0.0017087	173	173
ACAT1	-0.0968917	0.204741	0.308449	173	173
ACAT2	-0.0655584	0.391468	0.513821	173	173
ACBD3	-0.262602	0.000482281	0.00169426	173	173
ACBD4	0.272996	0.000279122	0.00104251	173	173
ACBD5	-0.0394031	0.606756	0.712013	173	173
ACBD6	-0.412406	1.72049e-08	1.78644e-07	173	173
ACBD7	-0.29158	9.9318e-05	0.000415205	173	172
ACCN1	-0.0248294	0.745739	0.82278	173	28
ACCN2	-0.322715	1.48893e-05	7.66458e-05	173	169
ACCN3	0.151838	0.0461281	0.0904242	173	173
ACCN4	-0.0880674	0.249243	0.36093	173	126
ACCN5	0.0171377	0.822918	0.881284	173	19
ACCSL	-0.12409	0.103819	0.177065	173	22
ACCS	-0.297489	7.04221e-05	0.000305639	173	173
ACD	0.153488	0.0437849	0.0866079	173	173
ACE2	-0.164333	0.0307342	0.0640887	173	75
ACER1	-0.135028	0.0765177	0.137916	173	107
ACER2	-0.323379	1.42657e-05	7.38658e-05	173	173
ACER3	0.450739	4.88075e-10	7.25561e-09	173	173
ACE	0.272564	0.000285666	0.0010645	173	171
ACHE	-0.189686	0.012434	0.029609	173	160
ACIN1	-0.175393	0.0209915	0.0462397	173	173
ACLY	-0.0086547	0.910021	0.940188	173	173
ACMSD	-0.0125798	0.86952	0.912071	173	63
ACN9	-0.298227	6.74242e-05	0.000294072	173	173
ACO1	-0.146002	0.0552731	0.105068	173	173
ACO2	0.217684	0.00401458	0.0110229	173	173
ACOT11	-0.176274	0.0203458	0.0450565	173	173
ACOT12	-0.0395515	0.6054	0.710722	173	87
ACOT13	-0.381548	2.22616e-07	1.77291e-06	173	173
ACOT1	-0.0649199	0.396107	0.518787	173	173
ACOT2	-0.0451196	0.555557	0.666532	173	173
ACOT4	0.033645	0.660337	0.755782	173	172
ACOT6	-0.154423	0.0425012	0.0844553	173	134
ACOT7	0.0304313	0.691034	0.780443	173	173
ACOT8	0.364246	8.37249e-07	5.79253e-06	173	173
ACOT9	0.62374	4.8906e-20	5.46623e-18	173	173
ACOX1	-0.0888992	0.244783	0.355743	173	173
ACOX2	0.48789	9.86669e-12	2.06775e-10	173	136
ACOX3	-0.0880825	0.249162	0.360845	173	173
ACOXL	0.0745063	0.329943	0.450365	173	80
ACP1	-0.477357	3.12869e-11	5.95953e-10	173	173
ACP2	0.501976	1.97939e-12	4.83002e-11	173	173
ACP5	0.290018	0.000108631	0.000449024	173	173
ACP6	-0.101131	0.185527	0.284299	173	173
ACPL2	0.0318528	0.677391	0.769503	173	173
ACPP	0.572108	1.99813e-16	1.11666e-14	173	173
ACPT	-0.107528	0.15909	0.251094	173	139
ACRBP	0.132149	0.0830667	0.147602	173	173
ACRC	0.0396265	0.604717	0.71022	173	173
ACRV1	-0.174848	0.0214004	0.0470384	173	169
ACR	-0.333741	7.217e-06	4.01133e-05	173	131
ACSBG1	-0.0535235	0.484308	0.602574	173	172
ACSBG2	-0.208566	0.00589219	0.0154394	173	172
ACSF2	0.131203	0.0853149	0.15096	173	173
ACSF3	0.0106472	0.889426	0.92519	173	173
ACSL1	0.493552	5.21882e-12	1.15995e-10	173	173
ACSL3	0.156334	0.0399759	0.0802322	173	173
ACSL4	0.165206	0.0298451	0.0624652	173	173
ACSL5	0.061066	0.424801	0.54694	173	173
ACSL6	-0.264908	0.000427984	0.00152388	173	164
ACSM1	-0.332195	8.00187e-06	4.3973e-05	173	164
ACSM2A	-0.0283698	0.710999	0.796653	173	20
ACSM2B	-0.184448	0.015127	0.0350477	173	5
ACSM3	-0.386751	1.47207e-07	1.22241e-06	173	173
ACSM4	-0.0348143	0.649304	0.74728	173	12
ACSM5	-0.0569305	0.456889	0.577248	173	92
ACSS1	-0.380672	2.38498e-07	1.88543e-06	173	173
ACSS2	0.511671	6.27352e-13	1.72104e-11	173	173
ACSS3	-0.0680608	0.373604	0.49576	173	82
ACTA1	0.183661	0.0155728	0.0359435	173	159
ACTA2	0.0135115	0.859952	0.90534	173	173
ACTBL2	-0.00616837	0.935804	0.957315	173	7
ACTB	0.424867	5.67158e-09	6.63264e-08	173	173
ACTC1	0.0727523	0.341487	0.462417	173	41
ACTG1	0.131521	0.0845538	0.149845	173	173
ACTG2	0.0405462	0.596352	0.702815	173	27
ACTL6A	-0.401248	4.47529e-08	4.19044e-07	173	173
ACTL6B	-0.198718	0.00876812	0.0218535	173	36
ACTL7A	-0.0143514	0.851344	0.899882	173	142
ACTL7B	0.00511726	0.946725	0.964257	173	89
ACTL8	-0.366237	7.21689e-07	5.07243e-06	173	72
ACTL9	0.030625	0.689169	0.778698	173	23
ACTN1	-0.0119334	0.876169	0.916312	173	173
ACTN2	-0.0558897	0.465172	0.585015	173	67
ACTN3	0.0426179	0.577705	0.686045	173	112
ACTN4	0.243722	0.00123232	0.0039218	173	173
ACTR10	-0.028078	0.713841	0.799004	173	173
ACTR1A	0.380128	2.48893e-07	1.95575e-06	173	173
ACTR1B	0.150572	0.0479975	0.0934161	173	173
ACTR2	0.173186	0.0226884	0.0494835	173	173
ACTR3B	-0.242587	0.00130094	0.00411125	173	173
ACTR3C	-0.0606533	0.427943	0.549981	173	170
ACTR3	0.309163	3.49158e-05	0.000163232	173	173
ACTR5	-0.090028	0.23882	0.348927	173	173
ACTR6	-0.372598	4.45967e-07	3.3028e-06	173	173
ACTR8	-0.319678	1.80884e-05	9.09003e-05	173	173
ACTRT1	0.0541039	0.479576	0.598524	173	3
ACVR1B	0.231219	0.00220782	0.00653939	173	173
ACVR1C	-0.129692	0.0890081	0.156272	173	169
ACVR1	0.280342	0.000187127	0.000733128	173	173
ACVR2A	0.0756386	0.322626	0.443015	173	173
ACVR2B	0.111613	0.143751	0.230724	173	173
ACVRL1	0.375533	3.55914e-07	2.70278e-06	173	161
ACY1	-0.15161	0.0464606	0.0909752	173	173
ACY3	0.00521679	0.945691	0.963526	173	169
ACYP1	-0.248273	0.00098924	0.00321449	173	173
ACYP2	-0.0790454	0.301248	0.419405	173	173
ADAD1	-0.0516648	0.499632	0.616356	173	5
ADAD2	-0.194655	0.0102782	0.0251214	173	33
ADAL	-0.461623	1.6331e-10	2.70532e-09	173	173
ADAM10	-0.0166039	0.828347	0.885079	173	173
ADAM11	-0.0959129	0.209374	0.314045	173	173
ADAM12	-0.304198	4.72269e-05	0.000213896	173	173
ADAM15	0.483315	1.63673e-11	3.28496e-10	173	173
ADAM17	0.109693	0.150813	0.239861	173	173
ADAM19	0.20303	0.00738322	0.0188336	173	173
ADAM20	-0.157218	0.0388518	0.0782185	173	172
ADAM21P1	-0.158915	0.036767	0.0746003	173	137
ADAM21	-0.325867	1.21401e-05	6.39148e-05	173	166
ADAM22	-0.538613	2.1123e-14	7.79509e-13	173	168
ADAM23	-0.121531	0.111201	0.187047	173	110
ADAM28	0.16613	0.0289284	0.0608149	173	173
ADAM29	-0.0595231	0.436617	0.55831	173	44
ADAM30	0.143863	0.0589809	0.110881	173	47
ADAM32	-0.138907	0.0683577	0.125559	173	119
ADAM33	-0.193932	0.0105701	0.0257313	173	122
ADAM6	0.0524722	0.492945	0.61011	173	173
ADAM7	-0.0951787	0.212898	0.318276	173	10
ADAM8	0.500663	2.30642e-12	5.55827e-11	173	173
ADAM9	0.446967	7.07008e-10	1.01079e-08	173	173
ADAMDEC1	0.441832	1.16234e-09	1.58856e-08	173	154
ADAMTS10	-0.0524702	0.492961	0.61011	173	173
ADAMTS12	-0.0708409	0.354355	0.475929	173	30
ADAMTS13	-0.241326	0.00138122	0.00433339	173	173
ADAMTS14	-0.175996	0.0205479	0.0454056	173	173
ADAMTS15	-0.357851	1.34012e-06	8.82285e-06	173	85
ADAMTS16	-0.176258	0.0203575	0.045072	173	135
ADAMTS17	-0.194847	0.010202	0.0249682	173	173
ADAMTS18	-0.226916	0.00267997	0.00773752	173	91
ADAMTS19	-0.132313	0.0826832	0.14712	173	14
ADAMTS1	-0.189409	0.0125651	0.0298445	173	165
ADAMTS20	-0.263791	0.000453535	0.0016037	173	19
ADAMTS2	0.0753123	0.324724	0.445142	173	156
ADAMTS3	-0.364185	8.41069e-07	5.81626e-06	173	144
ADAMTS4	-0.171721	0.023879	0.0517282	173	161
ADAMTS5	0.250642	0.000880889	0.00289912	173	140
ADAMTS6	-0.153566	0.0436763	0.0864195	173	172
ADAMTS7	-0.166741	0.0283352	0.0597876	173	166
ADAMTS8	-0.0172112	0.822171	0.880629	173	158
ADAMTS9	-0.214492	0.00459972	0.012433	173	122
ADAMTSL1	-0.101205	0.185204	0.283878	173	79
ADAMTSL2	-0.127339	0.0950087	0.164843	173	128
ADAMTSL3	-0.0661468	0.387223	0.509623	173	131
ADAMTSL4	0.328049	1.05253e-05	5.62199e-05	173	173
ADAMTSL5	0.142093	0.0622005	0.116069	173	157
ADAP1	0.660056	5.22219e-23	9.40381e-21	173	173
ADAP2	0.630449	1.47855e-20	1.77499e-18	173	173
ADARB1	-0.044139	0.564189	0.674226	173	173
ADARB2	-0.131829	0.0838238	0.148755	173	113
ADAR	-0.0062171	0.935298	0.956989	173	173
ADAT1	-0.152242	0.0455453	0.0895073	173	173
ADAT2	-0.443983	9.44782e-10	1.3115e-08	173	173
ADAT3	0.174682	0.0215258	0.0472713	173	173
ADA	-0.148389	0.0513661	0.0987707	173	173
ADCK1	0.219528	0.00370799	0.010293	173	173
ADCK2	0.186493	0.0140204	0.0327826	173	173
ADCK4	0.173809	0.0221983	0.0485562	173	173
ADCK5	0.303793	4.83918e-05	0.000218307	173	173
ADCY10	-0.151091	0.0472241	0.0921839	173	147
ADCY1	-0.0737182	0.335099	0.455703	173	172
ADCY2	0.126607	0.0969396	0.167372	173	131
ADCY3	-0.089711	0.240484	0.350884	173	173
ADCY4	0.517377	3.13598e-13	9.1437e-12	173	173
ADCY5	-0.0959606	0.209147	0.313728	173	52
ADCY6	-0.0633447	0.407692	0.530036	173	173
ADCY7	0.519848	2.31303e-13	6.90997e-12	173	173
ADCY8	-0.204096	0.00707253	0.0181436	173	7
ADCY9	0.240838	0.00141352	0.00441467	173	173
ADCYAP1R1	-0.0817035	0.285233	0.401855	173	5
ADCYAP1	-0.135546	0.0753841	0.136176	173	64
ADC	-0.115989	0.128595	0.210763	173	173
ADD1	0.187122	0.0136946	0.0321037	173	173
ADD2	-0.136093	0.0742017	0.134377	173	173
ADD3	0.395703	7.10486e-08	6.34997e-07	173	173
ADH1A	-0.331692	8.27421e-06	4.52777e-05	173	108
ADH1B	-0.0826522	0.279657	0.395461	173	86
ADH1C	-0.00709024	0.926235	0.95148	173	31
ADH4	-0.34676	2.95844e-06	1.79799e-05	173	92
ADH5	-0.412903	1.64739e-08	1.72132e-07	173	173
ADH6	-0.341592	4.23541e-06	2.49758e-05	173	137
ADHFE1	0.124799	0.101844	0.174156	173	173
ADI1	-0.0397845	0.603276	0.708956	173	173
ADIG	0.0148184	0.846565	0.897025	173	5
ADIPOQ	-0.0962691	0.20768	0.311985	173	74
ADIPOR1	0.115752	0.129381	0.211765	173	173
ADIPOR2	0.0950066	0.213731	0.319299	173	173
ADK	-0.202708	0.00747936	0.0190515	173	173
ADM2	-0.273726	0.000268385	0.00100628	173	172
ADM	0.412421	1.71824e-08	1.78602e-07	173	170
ADNP2	-0.268495	0.000354658	0.0012931	173	173
ADNP	-0.454014	3.52512e-10	5.4152e-09	173	173
ADORA1	0.260374	0.00054073	0.00187309	173	90
ADORA2A	0.351209	2.16106e-06	1.35794e-05	173	173
ADORA2B	0.226621	0.00271546	0.00782953	173	173
ADORA3	0.355605	1.57701e-06	1.0231e-05	173	173
ADO	0.0351117	0.64651	0.744865	173	173
ADPGK	0.188527	0.0129907	0.0307015	173	173
ADPRHL1	-0.133215	0.0805913	0.143898	173	172
ADPRHL2	-0.0415576	0.587215	0.694868	173	173
ADPRH	0.209591	0.00564781	0.0148853	173	173
ADRA1A	0.000587139	0.993883	0.995675	173	6
ADRA1B	0.0155419	0.839172	0.89284	173	31
ADRA1D	0.0941137	0.218086	0.324434	173	144
ADRA2A	-0.307621	3.83724e-05	0.000177472	173	166
ADRA2B	-0.0591568	0.43945	0.560715	173	115
ADRA2C	-0.349847	2.38037e-06	1.47997e-05	173	125
ADRB1	0.295122	8.08908e-05	0.000345523	173	164
ADRB2	0.18152	0.0168437	0.0383535	173	173
ADRB3	-0.135906	0.0746047	0.134995	173	58
ADRBK1	0.241069	0.00139815	0.0043765	173	173
ADRBK2	0.33773	5.5148e-06	3.15911e-05	173	173
ADRM1	-0.0533122	0.486038	0.60372	173	173
ADSL	-0.264257	0.000442712	0.00157028	173	173
ADSSL1	0.360677	1.08997e-06	7.36746e-06	173	172
ADSS	-0.397734	6.00418e-08	5.47185e-07	173	173
AEBP1	-0.390053	1.12803e-07	9.61347e-07	173	173
AEBP2	-0.326734	1.14721e-05	6.07265e-05	173	173
AEN	-0.153671	0.0435313	0.0862202	173	173
AES	0.0992415	0.193922	0.295038	173	173
AFAP1L1	-0.253058	0.000781761	0.00261097	173	164
AFAP1L2	-0.127962	0.0933889	0.16257	173	171
AFAP1	-0.0604239	0.429695	0.551744	173	173
AFARP1	-0.152918	0.0445831	0.0879808	173	171
AFF1	-0.0443946	0.561933	0.672149	173	173
AFF2	-0.300998	5.72086e-05	0.000253785	173	173
AFF3	0.0135203	0.859862	0.90534	173	173
AFF4	-0.244046	0.00121334	0.00386778	173	173
AFG3L1	0.0495772	0.517142	0.63234	173	173
AFG3L2	-0.1517	0.0463297	0.0907463	173	173
AFMID	-0.209171	0.00574683	0.0151135	173	173
AFP	-0.052396	0.493574	0.610664	173	3
AFTPH	0.389477	1.18185e-07	1.00282e-06	173	173
AG2	-0.238541	0.00157485	0.00485768	173	170
AGAP11	-0.0797533	0.296926	0.414426	173	163
AGAP1	-0.0151353	0.843326	0.895138	173	173
AGAP2	-0.128077	0.0930926	0.162126	173	173
AGAP3	0.28292	0.000162203	0.000646683	173	173
AGAP4	-0.2065	0.00641401	0.0166529	173	173
AGAP5	0.0234445	0.759475	0.833613	173	173
AGAP6	-0.0865172	0.257706	0.370865	173	173
AGAP7	0.0868062	0.256113	0.369064	173	173
AGAP8	-0.0571355	0.455268	0.575835	173	173
AGA	0.0325595	0.670646	0.764434	173	173
AGBL1	-0.33113	8.58924e-06	4.6804e-05	173	16
AGBL2	-0.286294	0.00013424	0.000545432	173	172
AGBL3	-0.286292	0.000134255	0.000545432	173	163
AGBL4	-0.3526	1.95702e-06	1.24177e-05	173	141
AGBL5	-0.4801	2.32547e-11	4.52258e-10	173	173
AGER	0.0992272	0.193986	0.295107	173	173
AGFG1	0.398296	5.72986e-08	5.2415e-07	173	173
AGFG2	-0.140824	0.0645954	0.11962	173	173
AGGF1	-0.203166	0.00734294	0.0187458	173	173
AGK	-0.396203	6.81719e-08	6.11535e-07	173	173
AGL	-0.302137	5.34475e-05	0.000238679	173	173
AGMAT	-0.198266	0.00892583	0.0221925	173	173
AGPAT1	-0.0943133	0.217107	0.323325	173	173
AGPAT2	0.254545	0.000725955	0.00244051	173	173
AGPAT3	0.395331	7.32587e-08	6.5265e-07	173	173
AGPAT4	-0.122107	0.109507	0.18487	173	173
AGPAT5	-0.555186	2.24672e-15	1.01851e-13	173	173
AGPAT6	0.159019	0.036643	0.0743822	173	173
AGPAT9	0.474803	4.11502e-11	7.68769e-10	173	173
AGPHD1	-0.0855824	0.262903	0.376839	173	155
AGPS	-0.260337	0.000541748	0.00187572	173	173
AGR2	-0.0814077	0.286986	0.403653	173	92
AGRN	-0.296133	7.62505e-05	0.000327862	173	173
AGRP	0.191465	0.0116207	0.0279805	173	163
AGTPBP1	-0.0302158	0.693112	0.782137	173	173
AGTR1	-0.23427	0.0019203	0.00579546	173	135
AGTRAP	0.551067	3.96698e-15	1.72209e-13	173	173
AGT	0.0591815	0.439259	0.560545	173	129
AGXT2L1	-0.0675265	0.377376	0.499709	173	6
AGXT2L2	0.243018	0.00127447	0.00403811	173	173
AGXT2	0.0559953	0.464328	0.584444	173	25
AGXT	-0.0932171	0.222522	0.329496	173	78
AHCTF1	-0.32439	1.33623e-05	6.97263e-05	173	173
AHCYL1	-0.0204294	0.789633	0.856581	173	173
AHCYL2	-0.093357	0.221826	0.328616	173	173
AHCY	-0.127952	0.0934158	0.162602	173	173
AHDC1	-0.387637	1.371e-07	1.14533e-06	173	173
AHI1	-0.378942	2.73111e-07	2.13569e-06	173	173
AHNAK2	0.097569	0.201579	0.304656	173	173
AHNAK	0.546866	7.028e-15	2.87748e-13	173	173
AHRR	-0.0439713	0.565671	0.675333	173	172
AHR	0.322398	1.51967e-05	7.80421e-05	173	173
AHSA1	-0.103898	0.173721	0.269678	173	173
AHSA2	0.00277737	0.97107	0.980957	173	173
AHSG	-0.0323464	0.672677	0.766028	173	32
AHSP	-0.182307	0.016366	0.0374278	173	166
AICDA	0.202376	0.00757989	0.0192824	173	84
AIDA	-0.129916	0.0884529	0.155424	173	173
AIF1L	-0.303576	4.90283e-05	0.000220923	173	172
AIF1	0.550432	4.32711e-15	1.85819e-13	173	173
AIFM1	0.0973528	0.202585	0.305884	173	173
AIFM2	0.330327	9.05826e-06	4.9071e-05	173	173
AIFM3	0.566425	4.57345e-16	2.34682e-14	173	171
AIG1	-0.259915	0.000553546	0.00191316	173	173
AIM1L	0.134792	0.0770386	0.138714	173	111
AIM1	0.312404	2.85843e-05	0.000136452	173	173
AIM2	0.374087	3.97869e-07	2.98755e-06	173	172
AIMP1	-0.246097	0.00109936	0.00353278	173	173
AIMP2	-0.0774503	0.311138	0.430188	173	173
AIPL1	-0.0487291	0.524344	0.639138	173	4
AIP	0.273965	0.000264954	0.00099514	173	173
AIRE	0.0163089	0.831351	0.88714	173	116
AJAP1	0.00925449	0.903815	0.935365	173	61
AK1	0.115934	0.128777	0.210991	173	173
AK2	0.188812	0.0128519	0.0304252	173	173
AK3L1	-0.23318	0.00201881	0.00604122	173	173
AK3	-0.457327	2.52748e-10	3.99629e-09	173	173
AK5	0.120107	0.115485	0.193131	173	173
AK7	-0.206229	0.00648523	0.0168032	173	144
AKAP10	0.195188	0.0100678	0.0246816	173	173
AKAP11	-0.261301	0.000515651	0.00179495	173	173
AKAP12	-0.193285	0.0108368	0.026282	173	172
AKAP13	0.384413	1.77434e-07	1.45466e-06	173	173
AKAP14	-0.0576	0.451604	0.572468	173	40
AKAP1	-0.0658341	0.389476	0.511723	173	173
AKAP2	-0.323435	1.42137e-05	7.3655e-05	173	172
AKAP3	-0.0220624	0.773257	0.844611	173	171
AKAP4	-0.0725848	0.342602	0.463508	173	12
AKAP5	-0.322629	1.49723e-05	7.69913e-05	173	173
AKAP6	-0.199432	0.0085238	0.021321	173	166
AKAP7	0.275722	0.000240948	0.00091594	173	173
AKAP8L	-0.00746611	0.922337	0.948792	173	173
AKAP8	0.0265917	0.728377	0.80978	173	173
AKAP9	-0.399679	5.10508e-08	4.73455e-07	173	173
AKD1	-0.540468	1.65371e-14	6.22076e-13	173	173
AKIRIN1	-0.160568	0.0348282	0.071389	173	173
AKIRIN2	0.518794	2.63439e-13	7.79811e-12	173	173
AKNAD1	-0.308932	3.54142e-05	0.00016532	173	142
AKNA	0.326344	1.17684e-05	6.21257e-05	173	173
AKR1A1	0.101129	0.185537	0.284299	173	173
AKR1B15	-0.13521	0.0761176	0.13734	173	19
AKR1B1	0.279364	0.000197484	0.000768289	173	173
AKR1C1	0.00579546	0.939677	0.959864	173	171
AKR1C2	-0.00737097	0.923323	0.949508	173	155
AKR1C3	-0.274877	0.000252227	0.000953968	173	172
AKR1C4	0.0467571	0.541286	0.65396	173	36
AKR1CL1	-0.0470427	0.538816	0.652044	173	71
AKR1D1	-0.0457885	0.549706	0.661142	173	61
AKR1E2	-0.14157	0.063178	0.117454	173	167
AKR7A2	0.145995	0.0552862	0.105081	173	173
AKR7A3	0.0763204	0.318271	0.438312	173	173
AKR7L	-0.118024	0.121978	0.201994	173	172
AKT1S1	0.160713	0.0346632	0.0711033	173	173
AKT1	0.222087	0.00331742	0.00933274	173	173
AKT2	-0.122958	0.107038	0.181472	173	173
AKT3	0.10757	0.158925	0.250875	173	173
AKTIP	0.143856	0.0589926	0.110892	173	173
ALAD	0.0722913	0.344563	0.465577	173	173
ALAS1	0.164956	0.0300969	0.0629313	173	173
ALAS2	-0.228714	0.00247259	0.00721484	173	172
ALB	-0.207553	0.00614305	0.0160406	173	92
ALCAM	-0.0745632	0.329573	0.450077	173	173
ALDH16A1	0.222585	0.00324579	0.00915531	173	173
ALDH18A1	-0.590036	1.31653e-17	8.92408e-16	173	173
ALDH1A1	0.0909808	0.233865	0.343083	173	168
ALDH1A2	0.0749502	0.327062	0.447464	173	86
ALDH1A3	-0.149617	0.0494474	0.0957726	173	166
ALDH1B1	-0.237023	0.00169052	0.00517427	173	173
ALDH1L1	0.0272803	0.72163	0.804624	173	63
ALDH1L2	-0.161398	0.0338883	0.0697008	173	173
ALDH2	0.273079	0.000277873	0.00103845	173	173
ALDH3A1	0.16686	0.0282209	0.0595918	173	134
ALDH3A2	0.398803	5.49253e-08	5.04576e-07	173	173
ALDH3B1	0.406375	2.89685e-08	2.85255e-07	173	173
ALDH3B2	0.21631	0.00425767	0.0116036	173	156
ALDH4A1	-0.0607438	0.427253	0.549448	173	173
ALDH5A1	-0.619843	9.669e-20	1.0332e-17	173	173
ALDH6A1	-0.506576	1.15275e-12	2.98916e-11	173	173
ALDH7A1	-0.239031	0.00153912	0.00476257	173	172
ALDH8A1	-0.0423578	0.580031	0.687916	173	172
ALDH9A1	0.102925	0.177807	0.274945	173	173
ALDOA	0.413394	1.57812e-08	1.66078e-07	173	173
ALDOB	-0.22043	0.00356587	0.00993967	173	168
ALDOC	0.233952	0.00194855	0.00586889	173	173
ALG10B	-0.340985	4.41591e-06	2.59223e-05	173	173
ALG10	-0.322888	1.47245e-05	7.59176e-05	173	173
ALG11	-0.372304	4.56117e-07	3.37027e-06	173	173
ALG12	0.0142137	0.852754	0.900736	173	173
ALG13	-0.147398	0.0529607	0.101389	173	173
ALG14	-0.0924628	0.226304	0.333851	173	173
ALG1L2	-0.0213083	0.780807	0.850309	173	137
ALG1L	-0.0102261	0.893773	0.928432	173	131
ALG1	-0.055105	0.471472	0.591026	173	173
ALG2	-0.178084	0.0190718	0.0426087	173	173
ALG3	-0.105654	0.166525	0.260671	173	173
ALG5	-0.208305	0.00595585	0.0155831	173	173
ALG6	-0.319388	1.8425e-05	9.2448e-05	173	173
ALG8	-0.3534	1.84814e-06	1.17999e-05	173	173
ALG9	-0.615125	2.17914e-19	2.16224e-17	173	173
ALKBH1	-0.0902209	0.23781	0.347766	173	173
ALKBH2	-0.323031	1.459e-05	7.53074e-05	173	173
ALKBH3	-0.27452	0.00025714	0.000969348	173	173
ALKBH4	-0.256773	0.000649149	0.00220942	173	173
ALKBH5	0.121846	0.110271	0.185885	173	173
ALKBH6	0.180887	0.0172363	0.0390508	173	173
ALKBH7	-0.0241824	0.752147	0.82783	173	173
ALKBH8	-0.161897	0.033333	0.0687591	173	173
ALK	0.296304	7.54925e-05	0.000324962	173	157
ALLC	-0.0481013	0.529709	0.643833	173	9
ALMS1P	-0.304192	4.72441e-05	0.000213924	173	157
ALMS1	-0.387517	1.38429e-07	1.15544e-06	173	173
ALOX12B	-0.137986	0.0702281	0.128425	173	130
ALOX12P2	-0.0717233	0.348377	0.469557	173	169
ALOX12	-0.0961351	0.208316	0.312841	173	173
ALOX15B	-0.0923813	0.226715	0.334281	173	131
ALOX15	-0.0201905	0.792037	0.858327	173	137
ALOX5AP	0.596516	4.72304e-18	3.46617e-16	173	173
ALOX5	0.39031	1.10475e-07	9.43989e-07	173	173
ALOXE3	-0.174077	0.0219897	0.048154	173	78
ALPI	-0.00932243	0.903112	0.934854	173	3
ALPK1	-0.00672977	0.929976	0.953503	173	173
ALPK2	0.246632	0.00107131	0.00345006	173	134
ALPK3	-0.194447	0.0103613	0.0253022	173	173
ALPL	0.00706373	0.92651	0.951511	173	160
ALPPL2	0.0111426	0.884316	0.921611	173	14
ALPP	0.0702974	0.358068	0.479429	173	83
ALS2CL	0.0235743	0.758184	0.832778	173	171
ALS2CR11	-0.22276	0.00322111	0.00909601	173	173
ALS2CR12	-0.115836	0.129103	0.211454	173	173
ALS2CR4	-0.411948	1.7905e-08	1.85145e-07	173	173
ALS2CR8	-0.415069	1.36239e-08	1.45262e-07	173	173
ALS2	-0.498195	3.06852e-12	7.13835e-11	173	173
ALX1	-0.0603643	0.430151	0.55222	173	23
ALX3	-0.150984	0.0473819	0.0924297	173	173
ALX4	-0.12575	0.0992425	0.170471	173	109
AMAC1L2	0.0540636	0.479903	0.598779	173	173
AMAC1L3	-0.123629	0.10512	0.178939	173	172
AMAC1	0.0125246	0.870088	0.91234	173	74
AMACR	-0.341637	4.22221e-06	2.49207e-05	173	173
AMBN	0.0252665	0.74142	0.819661	173	47
AMBP	-0.121917	0.110064	0.185599	173	113
AMBRA1	-0.229915	0.00234221	0.00689021	173	173
AMD1	-0.305945	4.24925e-05	0.000194309	173	173
AMDHD1	0.154086	0.0429598	0.0852358	173	170
AMDHD2	0.225288	0.00288127	0.00823318	173	173
AMELX	0.124671	0.102198	0.174669	173	9
AMFR	0.100507	0.188272	0.28772	173	173
AMHR2	-0.00732947	0.923754	0.949834	173	104
AMH	-0.112816	0.139453	0.225293	173	173
AMICA1	0.652749	2.2309e-22	3.74022e-20	173	173
AMIGO1	-0.379088	2.70025e-07	2.11406e-06	173	173
AMIGO2	-0.00290744	0.969716	0.980403	173	173
AMIGO3	-0.235456	0.00181805	0.00551367	173	173
AMMECR1L	-0.42573	5.24341e-09	6.18398e-08	173	173
AMMECR1	-0.0374226	0.624968	0.727271	173	173
AMN1	-0.188801	0.0128571	0.030434	173	173
AMN	-0.0690814	0.366464	0.487854	173	171
AMOTL1	-0.287989	0.00012195	0.000499934	173	173
AMOTL2	-0.131192	0.0853416	0.150994	173	162
AMOT	-0.210808	0.00536934	0.0142518	173	173
AMPD1	-0.0361015	0.637246	0.737205	173	139
AMPD2	0.0963249	0.207415	0.31166	173	173
AMPD3	0.00153176	0.984042	0.989087	173	173
AMPH	0.0751841	0.325551	0.445961	173	172
AMT	0.0636762	0.405238	0.527803	173	173
AMY1A	0.10196	0.181929	0.280073	173	158
AMY2A	0.0781994	0.306467	0.425028	173	136
AMY2B	0.0954507	0.211588	0.31656	173	173
AMZ1	0.0229617	0.764281	0.837724	173	173
AMZ2P1	-0.000350028	0.996353	0.997328	173	173
AMZ2	-0.205733	0.00661788	0.0171036	173	173
ANAPC10	-0.167616	0.0275044	0.058383	173	173
ANAPC11	0.181718	0.0167221	0.0380987	173	173
ANAPC13	-0.115208	0.131203	0.214153	173	173
ANAPC16	0.181254	0.0170075	0.0386719	173	173
ANAPC1	-0.483602	1.58585e-11	3.19602e-10	173	173
ANAPC2	0.12695	0.0960307	0.166098	173	173
ANAPC4	-0.056738	0.458415	0.578697	173	173
ANAPC5	-0.3159	2.29757e-05	0.000112382	173	173
ANAPC7	-0.535733	3.07943e-14	1.08889e-12	173	173
ANGEL1	-0.127163	0.0954699	0.165393	173	173
ANGEL2	-0.239694	0.00149187	0.00463554	173	173
ANGPT1	-0.0204036	0.789893	0.856738	173	173
ANGPT2	-0.170811	0.0246455	0.0531622	173	173
ANGPT4	0.117674	0.123096	0.203604	173	83
ANGPTL1	-0.255936	0.000677066	0.00229474	173	173
ANGPTL2	-0.110592	0.147475	0.235534	173	169
ANGPTL3	-0.17964	0.0180331	0.0406194	173	157
ANGPTL4	-0.234207	0.0019259	0.00580936	173	171
ANGPTL5	0.0248985	0.745056	0.822337	173	35
ANGPTL6	-0.234929	0.00186288	0.00563529	173	173
ANGPTL7	-0.162052	0.033163	0.0684738	173	173
ANG	0.347364	2.83563e-06	1.73202e-05	173	166
ANK1	-0.132981	0.0811299	0.14474	173	173
ANK2	-0.16747	0.0276421	0.0586049	173	137
ANK3	0.0724451	0.343535	0.464502	173	173
ANKAR	-0.292945	9.17943e-05	0.000386578	173	173
ANKDD1A	0.244326	0.00119718	0.00382124	173	173
ANKFN1	-0.015049	0.844208	0.895511	173	50
ANKFY1	-0.164255	0.0308147	0.0642251	173	173
ANKHD1-EIF4EBP3	-0.0763286	0.318219	0.438312	173	173
ANKHD1	-0.116	0.128558	0.210721	173	173
ANKH	-0.183988	0.0153858	0.0355718	173	173
ANKIB1	-0.329499	9.56742e-06	5.14994e-05	173	173
ANKK1	0.0742758	0.331446	0.451841	173	126
ANKLE1	-0.014935	0.845373	0.896209	173	173
ANKLE2	-0.549809	4.71185e-15	2.00956e-13	173	173
ANKMY1	0.173297	0.0226001	0.0493075	173	173
ANKMY2	-0.324791	1.30193e-05	6.81559e-05	173	173
ANKRA2	-0.264355	0.000440471	0.00156319	173	173
ANKRD10	-0.0782601	0.306091	0.424693	173	173
ANKRD11	0.0122792	0.872611	0.913967	173	173
ANKRD12	-0.102931	0.177783	0.274931	173	173
ANKRD13A	0.320075	1.7636e-05	8.89716e-05	173	173
ANKRD13B	-0.273362	0.000273685	0.00102417	173	173
ANKRD13C	-0.106478	0.163222	0.256513	173	173
ANKRD13D	0.363878	8.60482e-07	5.93217e-06	173	173
ANKRD16	-0.281378	0.000176715	0.000696967	173	173
ANKRD17	-0.454362	3.40484e-10	5.25952e-09	173	173
ANKRD19	0.0632801	0.408172	0.530511	173	173
ANKRD1	-0.0139147	0.855817	0.902852	173	92
ANKRD20A3	0.0314068	0.681661	0.772819	173	166
ANKRD20A4	-0.00440128	0.95417	0.969079	173	118
ANKRD20B	-0.0461784	0.546308	0.658441	173	159
ANKRD22	0.217559	0.00403627	0.0110747	173	172
ANKRD23	-0.0708069	0.354586	0.476176	173	173
ANKRD24	0.311884	2.9522e-05	0.000140515	173	172
ANKRD26P1	-0.0595854	0.436136	0.557768	173	38
ANKRD26	-0.375154	3.66474e-07	2.77322e-06	173	173
ANKRD27	-0.520618	2.10269e-13	6.34975e-12	173	173
ANKRD28	-0.373769	4.077e-07	3.04725e-06	173	173
ANKRD29	-0.0427921	0.576149	0.684774	173	104
ANKRD2	0.18739	0.0135577	0.0318289	173	31
ANKRD30B	-0.173926	0.0221069	0.0483779	173	15
ANKRD31	-0.0834452	0.275054	0.390513	173	100
ANKRD32	-0.211477	0.00522151	0.0138992	173	173
ANKRD33	0.145196	0.0566467	0.10727	173	35
ANKRD34A	0.00466052	0.951474	0.967341	173	173
ANKRD34B	0.463828	1.302e-10	2.20378e-09	173	116
ANKRD34C	0.0823125	0.281645	0.397925	173	5
ANKRD35	0.214209	0.00465501	0.0125528	173	158
ANKRD36BP1	-0.115325	0.130812	0.21368	173	173
ANKRD36B	-0.411947	1.79071e-08	1.85145e-07	173	173
ANKRD36	-0.423146	6.62865e-09	7.61453e-08	173	173
ANKRD37	0.396903	6.43308e-08	5.82994e-07	173	172
ANKRD39	0.0503422	0.510689	0.626933	173	173
ANKRD40	0.0876763	0.25136	0.363534	173	173
ANKRD42	-0.161673	0.0335818	0.0691841	173	173
ANKRD43	0.0949709	0.213903	0.319508	173	74
ANKRD44	0.224288	0.00301158	0.00856775	173	173
ANKRD45	-0.0941334	0.217989	0.32434	173	120
ANKRD46	-0.523376	1.49154e-13	4.62641e-12	173	173
ANKRD49	-0.190119	0.0122318	0.0291954	173	173
ANKRD50	-0.198818	0.00873351	0.0217784	173	173
ANKRD52	-0.161892	0.033339	0.0687642	173	173
ANKRD53	-0.0894011	0.242119	0.352555	173	162
ANKRD54	-0.116842	0.125789	0.207124	173	173
ANKRD55	0.140156	0.0658883	0.121668	173	169
ANKRD56	-0.0359235	0.638908	0.738293	173	31
ANKRD57	0.234241	0.00192284	0.00580223	173	150
ANKRD58	0.198834	0.00872798	0.0217673	173	173
ANKRD5	0.0850624	0.265825	0.38013	173	172
ANKRD6	0.0922953	0.22715	0.334794	173	173
ANKRD7	-0.141013	0.0642355	0.119033	173	67
ANKRD9	0.187698	0.0134019	0.0315088	173	173
ANKS1A	-0.0810451	0.289145	0.405838	173	173
ANKS1B	0.133637	0.0796286	0.142501	173	113
ANKS3	-0.126313	0.0977239	0.168383	173	173
ANKS4B	0.0304389	0.690961	0.780406	173	26
ANKS6	0.0267669	0.726658	0.808609	173	173
ANKZF1	0.0619876	0.417832	0.540173	173	173
ANLN	-0.149045	0.0503336	0.0970925	173	173
ANO10	0.0382018	0.617775	0.721148	173	173
ANO1	0.0250603	0.743458	0.821184	173	57
ANO2	-0.00848922	0.911735	0.941108	173	90
ANO3	-0.108421	0.155637	0.246323	173	38
ANO4	-0.0663267	0.38593	0.508196	173	22
ANO5	0.0325157	0.671063	0.764772	173	139
ANO6	0.36724	6.69363e-07	4.74755e-06	173	173
ANO7	-0.0225927	0.767961	0.840573	173	173
ANO8	0.365687	7.51955e-07	5.25681e-06	173	173
ANO9	0.151406	0.0467584	0.0914478	173	173
ANP32A	-0.17405	0.0220104	0.0481938	173	173
ANP32B	-0.181799	0.0166731	0.0380051	173	173
ANP32C	-0.0185602	0.808492	0.869858	173	152
ANP32D	-0.0684853	0.370624	0.492612	173	67
ANP32E	-0.134357	0.0780049	0.140129	173	173
ANPEP	0.0150925	0.843762	0.895421	173	173
ANTXR1	-0.271543	0.00030169	0.00111779	173	161
ANTXR2	0.146944	0.0537028	0.102635	173	173
ANTXRL	-0.0795986	0.297867	0.415442	173	42
ANUBL1	-0.308205	3.70267e-05	0.000172024	173	173
ANXA10	-0.00368352	0.961638	0.974922	173	66
ANXA11	0.512083	5.96996e-13	1.65626e-11	173	173
ANXA1	0.266878	0.000386129	0.00139322	173	173
ANXA2P1	0.43986	1.40392e-09	1.88084e-08	173	172
ANXA2P2	0.453866	3.57757e-10	5.46986e-09	173	173
ANXA2P3	0.319126	1.87353e-05	9.3884e-05	173	125
ANXA2	0.478489	2.76911e-11	5.31625e-10	173	173
ANXA3	0.079114	0.300827	0.41888	173	165
ANXA4	0.57243	1.90564e-16	1.07423e-14	173	173
ANXA5	0.515046	4.16929e-13	1.18199e-11	173	173
ANXA6	0.28356	0.00015651	0.000625783	173	173
ANXA7	-0.0369	0.629813	0.731391	173	173
ANXA8L1	-0.256879	0.000645708	0.00220041	173	18
ANXA8L2	-0.18381	0.0154875	0.0357679	173	113
ANXA8	-0.153573	0.0436668	0.0864114	173	146
ANXA9	0.144743	0.0574306	0.108522	173	173
AOAH	0.513241	5.19037e-13	1.45306e-11	173	173
AOC2	0.10641	0.163493	0.256917	173	173
AOC3	-0.0107606	0.888256	0.924676	173	172
AOX1	0.0575897	0.451685	0.572533	173	157
AOX2P	-0.181843	0.0166463	0.0379572	173	122
AP1AR	-0.347008	2.90737e-06	1.77083e-05	173	173
AP1B1	0.0290015	0.704859	0.791689	173	173
AP1G1	-0.0433665	0.571034	0.680316	173	173
AP1G2	0.23308	0.00202812	0.00606533	173	173
AP1M1	0.285316	0.000141838	0.000573249	173	173
AP1M2	0.0405323	0.596478	0.702921	173	60
AP1S1	0.247062	0.00104922	0.00338509	173	173
AP1S2	0.599936	2.7238e-18	2.08553e-16	173	173
AP1S3	0.339539	4.87547e-06	2.83124e-05	173	173
AP2A1	0.401998	4.20141e-08	3.97465e-07	173	173
AP2A2	0.302163	5.33642e-05	0.000238362	173	173
AP2B1	-0.34785	2.74043e-06	1.6802e-05	173	173
AP2M1	0.199037	0.00865806	0.0216096	173	173
AP2S1	0.291042	0.000102438	0.000426052	173	173
AP3B1	-0.0607618	0.427116	0.549338	173	173
AP3B2	0.0551696	0.470951	0.59045	173	117
AP3D1	0.26022	0.000544994	0.00188595	173	173
AP3M1	0.00155361	0.983815	0.989053	173	173
AP3M2	-0.485719	1.25565e-11	2.58411e-10	173	173
AP3S1	-0.0121156	0.874295	0.914843	173	173
AP3S2	0.38927	1.20188e-07	1.01759e-06	173	173
AP4B1	0.100542	0.188116	0.287526	173	173
AP4E1	-0.184945	0.0148513	0.0344704	173	173
AP4M1	-0.153642	0.043571	0.0862813	173	173
AP4S1	-0.38985	1.14676e-07	9.74749e-07	173	173
APAF1	0.38403	1.82909e-07	1.49212e-06	173	173
APBA1	-0.28703	0.000128767	0.000525113	173	167
APBA2	-0.131301	0.0850815	0.150616	173	173
APBA3	0.126412	0.0974613	0.168049	173	173
APBB1IP	0.387209	1.41895e-07	1.18132e-06	173	173
APBB1	0.0263951	0.730308	0.811155	173	173
APBB2	-0.077969	0.307899	0.426618	173	169
APBB3	0.215906	0.00433172	0.0117757	173	173
APC2	0.0516336	0.499891	0.616636	173	173
APCDD1L	0.0767675	0.315436	0.434985	173	158
APCDD1	0.175315	0.0210501	0.0463469	173	154
APC	-0.105239	0.168203	0.262769	173	173
APEH	0.0706138	0.355903	0.477362	173	173
APEX1	-0.393234	8.7042e-08	7.61833e-07	173	173
APEX2	0.119638	0.116924	0.19512	173	173
APH1A	0.268739	0.00035012	0.00127967	173	173
APH1B	-0.130987	0.085836	0.151679	173	173
API5	-0.228973	0.00244395	0.00714139	173	173
APIP	0.016145	0.833021	0.888385	173	173
APITD1	-0.386873	1.45778e-07	1.21158e-06	173	173
APLF	-0.331323	8.47979e-06	4.63114e-05	173	173
APLNR	-0.0642742	0.400832	0.523497	173	133
APLN	-0.0288674	0.70616	0.792876	173	162
APLP1	0.094405	0.216658	0.322829	173	141
APLP2	0.400299	4.84654e-08	4.51199e-07	173	173
APOA1BP	0.109073	0.153147	0.242937	173	173
APOA1	0.0360618	0.637617	0.737292	173	155
APOA2	0.512494	5.68123e-13	1.58067e-11	173	117
APOA4	-0.0469611	0.539521	0.652568	173	18
APOA5	0.034448	0.652753	0.750191	173	25
APOB48R	0.582151	4.44464e-17	2.7268e-15	173	173
APOBEC1	-0.0105188	0.890751	0.925935	173	7
APOBEC2	-0.150616	0.0479303	0.0933099	173	173
APOBEC3A	0.578022	8.29786e-17	4.89021e-15	173	172
APOBEC3B	-0.00192987	0.979896	0.986235	173	173
APOBEC3C	0.224734	0.00295289	0.0084205	173	173
APOBEC3D	0.0683567	0.371526	0.49357	173	173
APOBEC3F	-0.133753	0.0793655	0.142129	173	173
APOBEC3G	0.06601	0.388207	0.510505	173	173
APOBEC3H	0.171836	0.0237838	0.0515661	173	171
APOBEC4	-0.120252	0.115043	0.192493	173	109
APOB	-0.307672	3.82516e-05	0.000176997	173	105
APOC1	-0.0944588	0.216395	0.322512	173	142
APOC2	0.017046	0.82385	0.882136	173	151
APOC3	0.0515776	0.500357	0.617054	173	17
APOC4	0.0554369	0.468802	0.588476	173	30
APOD	-0.138177	0.0698372	0.12783	173	131
APOE	-0.0923524	0.226861	0.334444	173	171
APOF	-0.0384028	0.615926	0.719647	173	109
APOL1	0.271286	0.000305855	0.00113149	173	173
APOL2	0.26382	0.000452842	0.00160212	173	173
APOL3	0.369102	5.81753e-07	4.20436e-06	173	173
APOL4	-0.119706	0.116712	0.194822	173	173
APOL5	-0.079878	0.296168	0.413649	173	5
APOL6	0.132245	0.0828419	0.147372	173	173
APOLD1	-0.191711	0.011512	0.0277429	173	173
APOM	0.0196388	0.797596	0.862049	173	171
APOOL	-0.458062	2.34661e-10	3.74073e-09	173	173
APOO	-0.227628	0.00259608	0.0075255	173	173
APPBP2	-0.330331	9.05615e-06	4.9071e-05	173	173
APPL1	-0.249774	0.000919247	0.00301476	173	173
APPL2	-0.231049	0.00222492	0.00658503	173	173
APP	-0.250953	0.000867523	0.00286347	173	173
APRT	0.0200859	0.79309	0.859085	173	173
APTX	-0.168017	0.0271309	0.0577225	173	173
AQP10	0.0324773	0.67143	0.765048	173	110
AQP11	-0.366562	7.04328e-07	4.96836e-06	173	173
AQP12A	0.0593772	0.437744	0.559272	173	21
AQP12B	-0.0480296	0.530323	0.644406	173	71
AQP1	-0.0423646	0.57997	0.687898	173	173
AQP2	-0.0643136	0.400543	0.523189	173	15
AQP3	-0.17369	0.0222913	0.0487213	173	173
AQP4	-0.0674275	0.378078	0.5003	173	102
AQP5	0.0209894	0.784007	0.852337	173	10
AQP6	-0.179498	0.0181257	0.0407869	173	148
AQP7P1	-0.0821789	0.28243	0.398657	173	116
AQP7P3	-0.0145317	0.849498	0.898615	173	47
AQP7	0.0900496	0.238706	0.348814	173	101
AQP8	0.0210978	0.782919	0.851716	173	91
AQP9	0.588946	1.5607e-17	1.04547e-15	173	168
AQPEP	-0.137671	0.0708769	0.129382	173	152
AQR	-0.19672	0.00948438	0.0234106	173	173
ARAF	0.269909	0.000329105	0.00120991	173	173
ARAP1	0.730164	4.31211e-30	2.54127e-27	173	173
ARAP2	-0.0963827	0.207142	0.311369	173	173
ARAP3	0.362999	9.18382e-07	6.29784e-06	173	173
ARCN1	-0.0106096	0.889814	0.925365	173	173
ARC	0.0133248	0.861867	0.906515	173	159
AREG	0.152598	0.0450368	0.0887233	173	165
ARF1	0.241326	0.00138126	0.00433339	173	173
ARF3	0.40768	2.59039e-08	2.57304e-07	173	173
ARF4	-0.162831	0.0323152	0.0669863	173	173
ARF5	0.31408	2.5751e-05	0.000124455	173	173
ARF6	0.46	1.92751e-10	3.13955e-09	173	173
ARFGAP1	0.153383	0.0439304	0.0868691	173	173
ARFGAP2	0.0213549	0.78034	0.850039	173	173
ARFGAP3	-0.245028	0.00115748	0.00370363	173	173
ARFGEF1	-0.416647	1.18523e-08	1.28058e-07	173	173
ARFGEF2	-0.262421	0.000486798	0.00170612	173	173
ARFIP1	0.188816	0.0128499	0.0304244	173	173
ARFIP2	-0.0339118	0.657813	0.753735	173	173
ARFRP1	0.0543737	0.477384	0.596548	173	173
ARG1	-0.0219249	0.774633	0.845675	173	173
ARG2	-0.0757817	0.321709	0.442006	173	173
ARGFXP2	0.134801	0.0770176	0.138702	173	173
ARGFX	-0.0339365	0.65758	0.75364	173	50
ARGLU1	-0.217792	0.00399606	0.0109768	173	173
ARHGAP10	-0.205433	0.00669916	0.0172907	173	173
ARHGAP11A	-0.164473	0.0305902	0.0638324	173	173
ARHGAP11B	-0.280641	0.000184067	0.000723326	173	173
ARHGAP12	0.178987	0.0184633	0.0414348	173	173
ARHGAP15	-0.367292	6.66769e-07	4.73087e-06	173	173
ARHGAP17	0.295844	7.75537e-05	0.000332803	173	173
ARHGAP18	0.110828	0.146605	0.234518	173	173
ARHGAP19	0.0784481	0.304927	0.423617	173	173
ARHGAP1	0.268518	0.000354224	0.00129176	173	173
ARHGAP20	-0.0353431	0.644339	0.74283	173	153
ARHGAP21	0.25752	0.000625142	0.00213632	173	173
ARHGAP22	0.239073	0.00153605	0.00475687	173	173
ARHGAP23	-0.452173	4.23462e-10	6.37117e-09	173	173
ARHGAP24	0.390954	1.04843e-07	9.03003e-07	173	173
ARHGAP25	-0.150481	0.0481329	0.093637	173	173
ARHGAP26	0.547071	6.8356e-15	2.81054e-13	173	173
ARHGAP27	0.65153	2.83108e-22	4.70588e-20	173	173
ARHGAP28	-0.169867	0.0254618	0.0546498	173	103
ARHGAP29	0.205359	0.00671927	0.017338	173	161
ARHGAP30	0.660843	4.4551e-23	8.25169e-21	173	173
ARHGAP31	0.269864	0.000329893	0.00121235	173	172
ARHGAP32	-0.0317432	0.678439	0.770107	173	173
ARHGAP33	0.0070908	0.926229	0.95148	173	173
ARHGAP36	-0.0917931	0.229699	0.337937	173	5
ARHGAP39	-0.217469	0.00405177	0.0111062	173	168
ARHGAP42	-0.233918	0.00195163	0.00587726	173	162
ARHGAP4	0.479181	2.56932e-11	4.95716e-10	173	173
ARHGAP5	-0.274757	0.000253862	0.00095869	173	173
ARHGAP6	0.169541	0.0257496	0.0551761	173	166
ARHGAP8	-0.210381	0.00546565	0.0144699	173	137
ARHGAP9	0.545629	8.30418e-15	3.36458e-13	173	173
ARHGDIA	0.376469	3.31067e-07	2.53189e-06	173	173
ARHGDIB	0.200201	0.00826762	0.0207657	173	173
ARHGDIG	-0.00337723	0.964826	0.977135	173	64
ARHGEF10L	0.692808	4.58172e-26	1.41437e-23	173	165
ARHGEF10	-0.216971	0.00413915	0.0113218	173	173
ARHGEF11	0.530428	6.10958e-14	2.03292e-12	173	173
ARHGEF12	-0.0914333	0.231538	0.340154	173	173
ARHGEF15	-0.0814464	0.286756	0.403504	173	145
ARHGEF16	-0.292848	9.23137e-05	0.000388502	173	155
ARHGEF17	-0.295165	8.06898e-05	0.00034474	173	173
ARHGEF18	0.0282025	0.712627	0.798063	173	173
ARHGEF19	-0.0740768	0.332746	0.453296	173	173
ARHGEF1	0.535036	3.3716e-14	1.17721e-12	173	173
ARHGEF2	0.0640178	0.402718	0.525395	173	173
ARHGEF33	-0.123998	0.104078	0.177459	173	171
ARHGEF35	0.163322	0.0317911	0.0660619	173	172
ARHGEF37	-0.199179	0.00860977	0.0215084	173	162
ARHGEF38	0.000926762	0.990345	0.993307	173	5
ARHGEF3	0.399548	5.16113e-08	4.77288e-07	173	173
ARHGEF4	-0.178957	0.018483	0.0414696	173	169
ARHGEF5	0.128895	0.0910061	0.159193	173	172
ARHGEF6	-0.440654	1.30127e-09	1.75379e-08	173	173
ARHGEF7	-0.159648	0.0358972	0.0731102	173	173
ARHGEF9	-0.390819	1.06006e-07	9.10203e-07	173	173
ARID1A	-0.124671	0.102198	0.174669	173	173
ARID1B	-0.390787	1.0628e-07	9.12147e-07	173	173
ARID2	-0.217505	0.00404553	0.0110954	173	173
ARID3A	0.421225	7.88108e-09	8.91112e-08	173	173
ARID3B	0.241794	0.00135094	0.00425268	173	173
ARID3C	-0.0584788	0.44472	0.565955	173	56
ARID4A	-0.205849	0.00658664	0.017041	173	173
ARID4B	-0.25173	0.00083491	0.00276662	173	173
ARID5A	0.0354712	0.643139	0.741904	173	173
ARID5B	0.0705516	0.356328	0.477691	173	173
ARIH1	-0.321541	1.60574e-05	8.18782e-05	173	173
ARIH2	-0.0486053	0.5254	0.640064	173	173
ARL10	-0.261896	0.000500132	0.00174718	173	173
ARL11	0.202623	0.00750515	0.0191097	173	173
ARL13A	-0.268088	0.000362341	0.00131741	173	171
ARL13B	-0.145082	0.0568445	0.107592	173	173
ARL14	0.0341031	0.656006	0.752745	173	18
ARL15	-0.0107228	0.888645	0.924933	173	173
ARL16	-0.0327432	0.668897	0.762975	173	173
ARL17A	-0.169506	0.0257807	0.0552305	173	173
ARL17B	-0.146055	0.0551849	0.104931	173	172
ARL1	-0.441005	1.25833e-09	1.70062e-08	173	173
ARL2BP	0.180104	0.0177329	0.0400313	173	173
ARL2	-0.0881796	0.248639	0.360296	173	173
ARL3	0.122336	0.108838	0.183979	173	173
ARL4A	0.1437	0.0592702	0.111295	173	173
ARL4C	0.0508485	0.506442	0.623135	173	173
ARL4D	0.289018	0.000115015	0.00047363	173	173
ARL5A	-0.0753872	0.324241	0.444669	173	173
ARL5B	-0.387302	1.40843e-07	1.17357e-06	173	173
ARL5C	0.218162	0.00393293	0.0108278	173	163
ARL6IP1	-0.158247	0.0375769	0.0760138	173	173
ARL6IP4	0.141611	0.0631024	0.117347	173	173
ARL6IP5	0.240127	0.00146178	0.00455225	173	173
ARL6IP6	-0.19136	0.0116671	0.0280715	173	173
ARL6	-0.209139	0.00575431	0.0151291	173	173
ARL8A	0.460907	1.75714e-10	2.88622e-09	173	173
ARL8B	0.153782	0.043377	0.0859585	173	173
ARL9	-0.0747598	0.328296	0.448837	173	131
ARMC10	-0.291512	9.97093e-05	0.000416662	173	173
ARMC1	-0.583183	3.79762e-17	2.37479e-15	173	173
ARMC2	-0.0718731	0.347368	0.46849	173	173
ARMC3	-0.0139309	0.855652	0.90283	173	54
ARMC4	-0.242203	0.00132489	0.00417946	173	96
ARMC5	-0.25014	0.00090292	0.00296521	173	173
ARMC6	-0.0704733	0.356863	0.478258	173	173
ARMC7	0.346953	2.91873e-06	1.77719e-05	173	173
ARMC8	-0.240578	0.00143101	0.0044657	173	173
ARMC9	-0.255779	0.000682425	0.00230935	173	172
ARMCX1	-0.179977	0.0178148	0.0401882	173	173
ARMCX2	0.0213165	0.780726	0.850286	173	172
ARMCX3	-0.237646	0.00164216	0.00504688	173	173
ARMCX5	-0.224955	0.00292408	0.00834691	173	173
ARMCX6	-0.308342	3.67177e-05	0.000170711	173	173
ARMS2	0.044879	0.557669	0.668405	173	3
ARNT2	-0.093569	0.220773	0.327556	173	111
ARNTL2	0.0114852	0.880785	0.919508	173	171
ARNTL	0.335867	6.25595e-06	3.52552e-05	173	173
ARNT	0.201668	0.007798	0.0197571	173	173
ARPC1A	0.261053	0.000522242	0.00181627	173	173
ARPC1B	0.613616	2.8175e-19	2.73974e-17	173	173
ARPC2	0.454311	3.42204e-10	5.28189e-09	173	173
ARPC3	0.326965	1.13003e-05	5.98986e-05	173	173
ARPC4	0.510757	7.00198e-13	1.90454e-11	173	173
ARPC5L	0.112168	0.141757	0.228201	173	173
ARPC5	0.35661	1.46651e-06	9.58359e-06	173	173
ARPM1	-0.266402	0.000395889	0.00142526	173	172
ARPP19	-0.334096	7.04711e-06	3.93038e-05	173	173
ARPP21	-0.562171	8.4144e-16	4.09108e-14	173	108
ARR3	0.077062	0.313578	0.432914	173	103
ARRB1	0.225001	0.00291817	0.00833247	173	173
ARRB2	0.596787	4.52263e-18	3.34434e-16	173	173
ARRDC1	0.318107	1.99871e-05	9.94902e-05	173	173
ARRDC2	0.428626	4.02211e-09	4.8619e-08	173	173
ARRDC3	0.102581	0.17927	0.276658	173	173
ARRDC4	0.100243	0.18944	0.289253	173	173
ARRDC5	0.363891	8.59632e-07	5.92841e-06	173	173
ARSA	0.284167	0.000151287	0.000606647	173	173
ARSB	0.161523	0.0337486	0.069469	173	173
ARSD	0.1556	0.0409306	0.0817604	173	173
ARSE	-0.0728851	0.340604	0.461494	173	112
ARSF	0.212062	0.00509519	0.0135946	173	20
ARSG	0.277699	0.000216364	0.000834808	173	173
ARSH	-0.0767838	0.315333	0.434874	173	6
ARSI	-0.00517687	0.946106	0.963899	173	35
ARSJ	-0.0255695	0.738431	0.817593	173	93
ARSK	-0.537105	2.57419e-14	9.34007e-13	173	173
ART1	-0.0520012	0.49684	0.61384	173	98
ART3	0.179391	0.0181962	0.0409157	173	120
ART4	-0.213863	0.00472361	0.0127176	173	137
ART5	0.0747904	0.328098	0.448624	173	54
ARTN	0.156315	0.0400011	0.0802583	173	172
ARV1	-0.300112	6.03061e-05	0.000266371	173	173
ARVCF	-0.24406	0.00121257	0.00386718	173	173
ARX	0.00207425	0.978392	0.985027	173	71
AR	-0.224191	0.00302446	0.00859813	173	143
AS3MT	-0.00491901	0.948786	0.965618	173	171
ASAH1	0.411525	1.85776e-08	1.91661e-07	173	173
ASAH2B	-0.0499315	0.514149	0.62971	173	8
ASAH2	-0.0937057	0.220097	0.326751	173	26
ASAM	-0.217167	0.00410457	0.0112415	173	172
ASAP1IT1	0.213107	0.00487659	0.0130814	173	173
ASAP1	0.291294	0.000100965	0.000421004	173	173
ASAP2	0.013417	0.860922	0.905821	173	173
ASAP3	0.0909804	0.233868	0.343083	173	159
ASB10	0.0363355	0.635064	0.735512	173	3
ASB11	0.0056928	0.940744	0.960499	173	33
ASB12	-0.183284	0.01579	0.03638	173	140
ASB13	0.226876	0.00268476	0.00774791	173	173
ASB14	-0.163603	0.0314936	0.0655066	173	173
ASB15	0.086213	0.259389	0.372763	173	79
ASB16	0.0472662	0.536886	0.650552	173	173
ASB17	0.0446704	0.559503	0.669969	173	10
ASB1	0.157339	0.0386999	0.077961	173	173
ASB2	0.424383	5.92639e-09	6.88509e-08	173	173
ASB3	-0.136341	0.073672	0.133592	173	173
ASB4	-0.00361102	0.962393	0.975601	173	9
ASB5	0.148015	0.0519625	0.0997402	173	20
ASB6	-0.00999797	0.896129	0.930039	173	173
ASB7	-0.120892	0.113107	0.189777	173	173
ASB8	-0.0956795	0.21049	0.315265	173	173
ASB9	-0.140107	0.0659833	0.121808	173	160
ASCC1	-0.14844	0.0512863	0.098627	173	173
ASCC2	0.12576	0.0992149	0.170438	173	173
ASCC3	-0.237299	0.00166894	0.00511625	173	173
ASCL1	-0.0115549	0.880067	0.919103	173	37
ASCL2	0.149213	0.0500724	0.0966655	173	173
ASCL3	-0.315125	2.41212e-05	0.000117219	173	149
ASCL4	-0.130849	0.0861699	0.152109	173	38
ASF1A	-0.44982	5.34413e-10	7.87327e-09	173	173
ASF1B	0.0782869	0.305925	0.424579	173	173
ASFMR1	-0.171202	0.0243132	0.0525672	173	167
ASGR1	0.604277	1.34179e-18	1.11043e-16	173	171
ASGR2	0.593491	7.64382e-18	5.32821e-16	173	160
ASH1L	-0.284324	0.000149965	0.00060209	173	173
ASH2L	-0.328513	1.02097e-05	5.46842e-05	173	173
ASIP	-0.0537042	0.482833	0.601353	173	139
ASL	0.421647	7.58819e-09	8.62005e-08	173	173
ASMTL	-0.0967137	0.205579	0.309435	173	173
ASMT	-0.101219	0.185143	0.283807	173	98
ASNA1	0.0178441	0.815746	0.875241	173	173
ASNSD1	-0.457914	2.38201e-10	3.79094e-09	173	173
ASNS	-0.314176	2.55965e-05	0.000123739	173	173
ASPA	-0.134547	0.0775826	0.139487	173	101
ASPDH	-0.0206684	0.78723	0.854722	173	163
ASPG	-0.374048	3.99065e-07	2.99307e-06	173	39
ASPHD1	-0.0718316	0.347648	0.468769	173	154
ASPHD2	0.399068	5.37222e-08	4.94692e-07	173	173
ASPH	-0.138855	0.0684635	0.125711	173	173
ASPM	-0.32188	1.57109e-05	8.03858e-05	173	173
ASPN	-0.245474	0.00113294	0.00362928	173	171
ASPRV1	-0.171017	0.0244695	0.0528641	173	173
ASPSCR1	0.27359	0.000270359	0.00101309	173	173
ASRGL1	0.320427	1.72437e-05	8.73324e-05	173	173
ASS1	-0.320632	1.70191e-05	8.63747e-05	173	135
ASTE1	-0.184856	0.0149003	0.0345718	173	173
ASTL	0.0540814	0.479759	0.598637	173	125
ASTN1	-0.29969	6.18344e-05	0.00027238	173	45
ASTN2	0.00121637	0.987328	0.991457	173	160
ASXL1	-0.365665	7.53222e-07	5.26362e-06	173	173
ASXL2	-0.0889657	0.244429	0.355361	173	173
ASXL3	-0.119207	0.118256	0.196955	173	46
ATAD1	-0.527064	9.37668e-14	3.04018e-12	173	173
ATAD2B	-0.146201	0.0549385	0.104544	173	173
ATAD2	-0.287769	0.000123485	0.000505798	173	173
ATAD3A	-0.0997971	0.191426	0.291919	173	173
ATAD3B	-0.0602099	0.431335	0.553401	173	173
ATAD3C	0.0976732	0.201096	0.304032	173	170
ATAD5	-0.359708	1.17023e-06	7.84509e-06	173	173
ATCAY	-0.438395	1.61388e-09	2.14097e-08	173	144
ATE1	-0.391107	1.03545e-07	8.93015e-07	173	173
ATF1	-0.104408	0.17161	0.266912	173	173
ATF2	-0.27627	0.000233881	0.000893794	173	173
ATF3	0.0234626	0.759295	0.83348	173	173
ATF4	-0.138422	0.0693387	0.127085	173	173
ATF5	0.287122	0.000128102	0.000522949	173	173
ATF6B	0.188534	0.0129875	0.0306977	173	173
ATF6	-0.104055	0.173068	0.268836	173	173
ATF7IP2	-0.358829	1.24787e-06	8.29697e-06	173	173
ATF7IP	-0.223019	0.00318458	0.00900462	173	173
ATF7	0.0366634	0.632012	0.733114	173	173
ATG10	-0.226582	0.00272019	0.00783853	173	173
ATG12	-0.182705	0.0161292	0.0370038	173	173
ATG16L1	-0.0311855	0.683782	0.774367	173	173
ATG16L2	0.378989	2.72116e-07	2.12876e-06	173	173
ATG2A	0.173504	0.0224369	0.049012	173	173
ATG2B	-0.367131	6.74881e-07	4.78145e-06	173	173
ATG3	0.45217	4.23587e-10	6.37117e-09	173	173
ATG4A	-0.00457209	0.952394	0.968023	173	173
ATG4B	0.0666561	0.383569	0.50574	173	173
ATG4C	-0.279739	0.000193458	0.00075383	173	173
ATG4D	0.0929466	0.223873	0.331169	173	173
ATG5	-0.0740971	0.332614	0.45321	173	173
ATG7	0.433835	2.48051e-09	3.14479e-08	173	173
ATG9A	0.19274	0.0110665	0.0267721	173	173
ATG9B	0.0554267	0.468884	0.588541	173	170
ATHL1	0.130921	0.0859962	0.151882	173	173
ATIC	-0.295827	7.76306e-05	0.000333037	173	173
ATL1	-0.221486	0.00340557	0.00954208	173	173
ATL2	-0.440015	1.38321e-09	1.85649e-08	173	173
ATL3	-0.0273575	0.720874	0.804335	173	173
ATMIN	-0.166627	0.0284449	0.0599801	173	173
ATM	0.0507233	0.50749	0.624007	173	173
ATN1	0.159276	0.036336	0.0738415	173	173
ATOH7	-0.189477	0.0125329	0.0297862	173	88
ATOH8	0.263907	0.000450807	0.00159521	173	163
ATOX1	0.172987	0.0228473	0.0497631	173	173
ATP10A	0.127604	0.0943179	0.163849	173	173
ATP10B	-0.366958	6.83703e-07	4.83515e-06	173	143
ATP10D	-0.0802935	0.293656	0.410983	173	173
ATP11A	0.0720792	0.345984	0.467076	173	173
ATP11B	-0.0261512	0.732704	0.812871	173	173
ATP11C	-0.217537	0.00403993	0.0110816	173	173
ATP12A	-0.479001	2.61979e-11	5.04953e-10	173	73
ATP13A1	0.161738	0.0335097	0.0690869	173	173
ATP13A2	0.332828	7.6714e-06	4.23965e-05	173	173
ATP13A3	-0.0850364	0.265972	0.380228	173	173
ATP13A4	-0.352443	1.97905e-06	1.25452e-05	173	168
ATP13A5	-0.133536	0.0798571	0.142836	173	15
ATP1A1	0.21114	0.0052954	0.0140747	173	173
ATP1A2	0.0089269	0.907204	0.937925	173	77
ATP1A3	0.0109044	0.886772	0.923576	173	173
ATP1A4	0.022013	0.773752	0.845009	173	83
ATP1B1	-0.20992	0.00557131	0.0147116	173	173
ATP1B2	-0.176161	0.0204274	0.045182	173	171
ATP1B3	0.210292	0.00548573	0.0145191	173	173
ATP1B4	0.0218957	0.774925	0.845788	173	14
ATP2A1	-0.170844	0.0246174	0.0531246	173	173
ATP2A2	-0.0945753	0.215827	0.321812	173	173
ATP2A3	-0.072819	0.341044	0.461978	173	173
ATP2B1	0.200428	0.00819334	0.0206031	173	173
ATP2B2	-0.11928	0.118031	0.196648	173	170
ATP2B3	-0.123409	0.105746	0.1798	173	124
ATP2B4	0.0166617	0.827759	0.884665	173	173
ATP2C1	-0.554918	2.33201e-15	1.05472e-13	173	173
ATP2C2	0.170238	0.0251379	0.0540844	173	165
ATP4A	0.0151276	0.843404	0.895138	173	34
ATP4B	-0.16872	0.0264859	0.0565359	173	115
ATP5A1	-0.144991	0.0570014	0.107831	173	173
ATP5B	0.0206583	0.787333	0.854722	173	173
ATP5C1	-0.117242	0.124489	0.205506	173	173
ATP5D	0.216913	0.00414945	0.0113452	173	173
ATP5EP2	0.130981	0.0858511	0.151688	173	173
ATP5E	0.357352	1.38965e-06	9.13348e-06	173	173
ATP5F1	0.0342148	0.654952	0.752097	173	173
ATP5G1	-0.114624	0.133182	0.216911	173	173
ATP5G2	-0.0763229	0.318255	0.438312	173	173
ATP5G3	0.0201366	0.792579	0.858771	173	173
ATP5H	0.18297	0.0159734	0.0367112	173	173
ATP5I	0.252123	0.000818826	0.00272307	173	173
ATP5J2	0.114612	0.133223	0.21694	173	173
ATP5J	-0.147917	0.0521203	0.099974	173	173
ATP5L2	-0.107539	0.159047	0.251046	173	171
ATP5L	-0.0382182	0.617624	0.721112	173	173
ATP5O	-0.0214848	0.779038	0.849018	173	173
ATP5SL	-0.0324527	0.671664	0.765143	173	173
ATP5S	-0.306801	4.03383e-05	0.00018568	173	173
ATP6AP1L	-0.352381	1.98782e-06	1.25885e-05	173	172
ATP6AP1	0.330423	9.00118e-06	4.88026e-05	173	173
ATP6AP2	0.382505	2.06418e-07	1.6616e-06	173	173
ATP6V0A1	0.47933	2.52818e-11	4.89234e-10	173	173
ATP6V0A2	-0.358927	1.23903e-06	8.24664e-06	173	173
ATP6V0A4	-0.169254	0.0260046	0.0556368	173	14
ATP6V0B	0.34082	4.46628e-06	2.61943e-05	173	173
ATP6V0C	0.506898	1.10959e-12	2.90436e-11	173	173
ATP6V0D1	0.588931	1.56434e-17	1.04547e-15	173	173
ATP6V0D2	0.0917378	0.229981	0.338326	173	78
ATP6V0E1	0.345611	3.20582e-06	1.93503e-05	173	173
ATP6V0E2	0.324269	1.34679e-05	7.02516e-05	173	173
ATP6V1A	0.411812	1.81191e-08	1.87237e-07	173	173
ATP6V1B1	-0.0169039	0.825295	0.8831	173	137
ATP6V1B2	0.522659	1.63131e-13	5.02784e-12	173	173
ATP6V1C1	-0.0103933	0.892047	0.926869	173	173
ATP6V1C2	-0.260074	0.000549084	0.00189842	173	173
ATP6V1D	0.000860971	0.99103	0.993569	173	173
ATP6V1E1	0.396404	6.70431e-08	6.03636e-07	173	173
ATP6V1E2	0.104509	0.171191	0.266453	173	173
ATP6V1F	0.360799	1.08019e-06	7.31205e-06	173	173
ATP6V1G1	0.0671007	0.380399	0.502683	173	173
ATP6V1G2	-0.224238	0.00301822	0.00858414	173	173
ATP6V1H	0.0318239	0.677667	0.76962	173	173
ATP7A	-0.202934	0.00741179	0.0189017	173	173
ATP7B	-0.385454	1.63299e-07	1.34684e-06	173	173
ATP8A1	-0.102882	0.177989	0.275118	173	173
ATP8A2	-0.122194	0.109253	0.18452	173	140
ATP8B1	-0.177022	0.0198104	0.0440716	173	173
ATP8B2	-0.27281	0.000281926	0.00105137	173	173
ATP8B3	0.184078	0.015335	0.0354788	173	173
ATP8B4	-0.093537	0.220932	0.32769	173	173
ATP8B5P	-0.00671616	0.930117	0.953503	173	173
ATP9A	-0.449746	5.38317e-10	7.91322e-09	173	172
ATP9B	-0.233994	0.00194484	0.00586134	173	173
ATPAF1	-0.0863578	0.258587	0.371753	173	173
ATPAF2	-0.00382788	0.960136	0.973704	173	173
ATPBD4	-0.230897	0.00224035	0.00662365	173	173
ATPIF1	-2.86173e-05	0.999702	0.999805	173	173
ATRIP	-0.161455	0.0338245	0.0695957	173	173
ATRNL1	0.0169939	0.82438	0.88246	173	63
ATRN	0.0424952	0.578802	0.687155	173	173
ATRX	-0.318365	1.96636e-05	9.80557e-05	173	173
ATR	-0.294544	8.36627e-05	0.000356033	173	173
ATXN10	-0.445527	8.13432e-10	1.14552e-08	173	173
ATXN1L	0.0824966	0.280567	0.396603	173	173
ATXN1	0.268579	0.000353085	0.00128881	173	173
ATXN2L	0.0436572	0.568454	0.678239	173	173
ATXN2	-0.348735	2.57484e-06	1.58768e-05	173	173
ATXN3L	0.0568407	0.4576	0.577884	173	11
ATXN3	-0.282266	0.00016821	0.000667076	173	173
ATXN7L1	-0.0284353	0.710361	0.796167	173	173
ATXN7L2	-0.186899	0.0138092	0.0323335	173	173
ATXN7L3B	-0.33265	7.76263e-06	4.27913e-05	173	173
ATXN7L3	0.277399	0.000219939	0.000846671	173	173
ATXN7	-0.18864	0.0129355	0.0306009	173	173
AUH	-0.418248	1.02837e-08	1.13312e-07	173	173
AUP1	0.208409	0.0059305	0.0155272	173	173
AURKAIP1	0.220021	0.0036296	0.0101014	173	173
AURKAPS1	-0.209346	0.00570544	0.0150189	173	173
AURKA	-0.243788	0.00122846	0.00391079	173	173
AURKB	-0.125537	0.0998189	0.171264	173	173
AURKC	-0.0142048	0.852845	0.900784	173	167
AUTS2	-0.366948	6.84244e-07	4.83721e-06	173	173
AVEN	-0.502981	1.76008e-12	4.32198e-11	173	173
AVIL	0.136613	0.0730924	0.132714	173	173
AVL9	0.0165271	0.829129	0.885692	173	173
AVPI1	0.229671	0.0023682	0.00695513	173	172
AVPR1A	0.0397329	0.603746	0.709337	173	125
AVPR1B	-0.216414	0.00423884	0.0115588	173	158
AVPR2	0.383468	1.91263e-07	1.55375e-06	173	173
AVP	-0.0858924	0.261172	0.374771	173	48
AWAT1	-0.110417	0.148118	0.236347	173	123
AWAT2	-0.0244336	0.749657	0.826012	173	12
AXIN1	0.0285365	0.709376	0.795338	173	173
AXIN2	-0.0190795	0.80324	0.866365	173	168
AXL	-0.292692	9.31501e-05	0.000391609	173	172
AZGP1	-0.409058	2.30052e-08	2.32057e-07	173	46
AZI1	-0.123042	0.106796	0.181157	173	173
AZI2	-0.040014	0.601186	0.707397	173	173
AZIN1	-0.116462	0.127031	0.208834	173	173
AZU1	0.105575	0.166842	0.26102	173	172
B2M	0.177972	0.0191492	0.0427571	173	173
B3GALNT1	-0.329458	9.59384e-06	5.16273e-05	173	173
B3GALNT2	-0.13798	0.0702405	0.128425	173	173
B3GALT1	0.232896	0.00204526	0.00610813	173	106
B3GALT2	-0.182335	0.0163493	0.0374	173	173
B3GALT4	0.474278	4.35226e-11	8.09979e-10	173	173
B3GALT5	0.0255157	0.738963	0.817995	173	21
B3GALT6	-0.302131	5.34671e-05	0.000238712	173	173
B3GALTL	-0.471302	5.96855e-11	1.0828e-09	173	173
B3GAT1	0.0961141	0.208416	0.312921	173	168
B3GAT2	0.0845922	0.268486	0.382894	173	173
B3GAT3	0.166111	0.0289468	0.0608406	173	173
B3GNT1	-0.139655	0.0668689	0.123197	173	173
B3GNT2	-0.394239	8.01555e-08	7.06328e-07	173	173
B3GNT3	-0.145371	0.0563463	0.106774	173	124
B3GNT4	-0.143934	0.0588549	0.110708	173	172
B3GNT5	-0.13911	0.0679522	0.124932	173	173
B3GNT6	0.148942	0.0504947	0.0973647	173	57
B3GNT7	0.00535522	0.944252	0.962868	173	173
B3GNT8	0.546474	7.41031e-15	3.02764e-13	173	173
B3GNT9	-0.203027	0.00738412	0.0188336	173	173
B3GNTL1	-0.0950611	0.213467	0.318979	173	173
B4GALNT1	-0.0224813	0.769072	0.84141	173	67
B4GALNT2	-0.0539016	0.481223	0.599963	173	5
B4GALNT3	0.0124139	0.871225	0.913029	173	156
B4GALNT4	-0.156119	0.0402542	0.0806646	173	109
B4GALT1	0.629745	1.67853e-20	1.97842e-18	173	173
B4GALT2	-0.254796	0.000716905	0.00241259	173	173
B4GALT3	-0.119591	0.117066	0.195308	173	173
B4GALT4	-0.0316551	0.679282	0.770661	173	173
B4GALT5	0.175693	0.0207699	0.0458234	173	173
B4GALT6	-0.372947	4.34235e-07	3.22205e-06	173	173
B4GALT7	-0.0389414	0.610981	0.715588	173	173
B9D1	0.0807675	0.290805	0.407698	173	162
B9D2	0.166618	0.0284537	0.0599922	173	173
BAALC	-0.219573	0.00370079	0.0102804	173	173
BAAT	-0.0328806	0.66759	0.76184	173	106
BACE1	-0.210239	0.00549786	0.0145473	173	173
BACE2	-0.104928	0.169471	0.264401	173	170
BACH1	0.192845	0.0110221	0.0266814	173	173
BACH2	0.058643	0.44344	0.564622	173	173
BAD	0.187921	0.0132902	0.0312877	173	173
BAG1	0.082825	0.27865	0.394377	173	173
BAG2	-0.206797	0.00633653	0.0164792	173	173
BAG3	0.338858	5.10759e-06	2.94668e-05	173	173
BAG4	0.203995	0.00710149	0.0182011	173	173
BAG5	-0.361324	1.03932e-06	7.0501e-06	173	173
BAGE2	-0.0743454	0.330992	0.451412	173	172
BAGE	-0.0449604	0.556954	0.667766	173	65
BAHCC1	-0.165845	0.0292085	0.0613044	173	173
BAHD1	-0.167691	0.027434	0.0582781	173	173
BAI1	0.167394	0.0277136	0.0587118	173	172
BAI2	-0.190194	0.012197	0.0291266	173	153
BAI3	0.119202	0.118273	0.196966	173	69
BAIAP2L1	0.30404	4.76768e-05	0.000215482	173	173
BAIAP2L2	-0.135315	0.0758869	0.13697	173	171
BAIAP2	0.113611	0.13667	0.221497	173	173
BAIAP3	-5.31134e-05	0.999447	0.999601	173	173
BAK1	0.51019	7.49545e-13	2.03308e-11	173	173
BAMBI	-0.115366	0.130674	0.213519	173	157
BANF1	-0.0996159	0.192237	0.292969	173	173
BANK1	-0.140761	0.0647174	0.119778	173	173
BANP	0.0346874	0.650498	0.748264	173	173
BAP1	0.0192267	0.801754	0.865241	173	173
BARD1	-0.190636	0.0119935	0.0287429	173	173
BARHL1	-0.0855903	0.262859	0.376815	173	121
BARX1	0.0869813	0.255152	0.367816	173	26
BARX2	-0.0242291	0.751684	0.827648	173	15
BASP1	0.446936	7.09172e-10	1.01263e-08	173	173
BAT1	0.297524	7.02757e-05	0.00030514	173	173
BAT2L1	-0.231091	0.00222074	0.00657465	173	173
BAT2L2	-0.254152	0.00074033	0.00248412	173	173
BAT2	-0.190595	0.0120125	0.0287754	173	173
BAT3	0.177809	0.0192614	0.0429681	173	173
BAT4	0.0426489	0.577428	0.685963	173	173
BAT5	0.297069	7.21798e-05	0.000311945	173	173
BATF2	0.442318	1.10931e-09	1.52358e-08	173	171
BATF3	0.401681	4.31496e-08	4.06971e-07	173	161
BATF	0.297706	6.95284e-05	0.000302368	173	173
BAX	0.224764	0.00294898	0.00841058	173	173
BAZ1A	0.0755162	0.323412	0.443782	173	173
BAZ1B	-0.192247	0.011278	0.0272162	173	173
BAZ2A	0.000209949	0.997813	0.998227	173	173
BAZ2B	-0.0779293	0.308146	0.4269	173	173
BBC3	0.347926	2.72592e-06	1.67236e-05	173	173
BBOX1	0.0492183	0.520183	0.6353	173	19
BBS10	-0.119413	0.117617	0.196063	173	173
BBS12	0.0619219	0.418327	0.540608	173	173
BBS1	-0.324707	1.3091e-05	6.8476e-05	173	173
BBS2	0.0559311	0.464842	0.584788	173	173
BBS4	0.0175699	0.818528	0.877743	173	173
BBS5	-0.291629	9.90362e-05	0.000414116	173	173
BBS7	0.119065	0.1187	0.197525	173	173
BBS9	-0.183904	0.0154336	0.0356687	173	173
BBX	-0.159334	0.0362676	0.0737409	173	173
BCAM	-0.232555	0.00207745	0.00619571	173	172
BCAN	0.154496	0.0424025	0.0843367	173	125
BCAP29	-0.127138	0.0955355	0.165492	173	173
BCAP31	0.105037	0.169025	0.263821	173	173
BCAR1	-0.0715729	0.349391	0.470728	173	137
BCAR3	-0.0639693	0.403075	0.525719	173	172
BCAR4	-0.165787	0.0292654	0.0613974	173	87
BCAS1	0.0125784	0.869534	0.912071	173	122
BCAS2	-0.233446	0.00199443	0.00598022	173	173
BCAS3	-0.108621	0.15487	0.245233	173	173
BCAS4	0.39464	7.75543e-08	6.87142e-07	173	173
BCAT1	-0.200511	0.00816654	0.020541	173	173
BCAT2	-0.113621	0.136634	0.221456	173	173
BCCIP	-0.362398	9.60127e-07	6.56077e-06	173	173
BCDIN3D	-0.031896	0.676977	0.769303	173	173
BCHE	-0.054608	0.475486	0.594831	173	46
BCKDHA	0.305855	4.27244e-05	0.00019514	173	173
BCKDHB	-0.692306	5.14005e-26	1.5379e-23	173	173
BCKDK	0.518195	2.83596e-13	8.344e-12	173	173
BCL10	0.183079	0.0159094	0.0365944	173	173
BCL11A	-0.408587	2.39582e-08	2.40547e-07	173	173
BCL11B	-0.113699	0.136362	0.221034	173	173
BCL2A1	0.60186	1.99269e-18	1.56265e-16	173	173
BCL2L10	-0.144314	0.058183	0.109635	173	131
BCL2L11	0.414646	1.41397e-08	1.50022e-07	173	173
BCL2L12	-0.127102	0.0956307	0.165597	173	173
BCL2L13	0.174561	0.0216179	0.0474466	173	173
BCL2L14	0.0642852	0.400752	0.523427	173	108
BCL2L15	0.135847	0.0747324	0.135212	173	173
BCL2L1	-0.316881	2.15991e-05	0.000106432	173	173
BCL2L2	0.0384201	0.615767	0.719548	173	173
BCL2	-0.463879	1.29521e-10	2.19609e-09	173	173
BCL3	0.511658	6.28312e-13	1.72104e-11	173	173
BCL6B	-0.26246	0.000485828	0.00170333	173	156
BCL6	0.637986	3.72342e-21	5.06384e-19	173	173
BCL7A	-0.331134	8.58657e-06	4.68026e-05	173	173
BCL7B	0.216449	0.00423254	0.0115448	173	173
BCL7C	0.122638	0.107959	0.182763	173	173
BCL8	-0.0573175	0.45383	0.574503	173	156
BCL9L	0.110883	0.146407	0.23427	173	173
BCL9	-0.0606505	0.427964	0.549981	173	173
BCLAF1	-0.29945	6.27224e-05	0.000275542	173	173
BCMO1	-0.140806	0.0646301	0.119662	173	65
BCO2	-0.137793	0.0706248	0.129005	173	173
BCORL1	-0.174483	0.0216778	0.0475513	173	173
BCORL2	-0.0464249	0.544166	0.656551	173	93
BCOR	-0.0475474	0.534464	0.648021	173	173
BCR	-0.459765	1.97405e-10	3.2073e-09	173	173
BCS1L	-0.142415	0.0616038	0.1151	173	173
BCYRN1	0.0296065	0.698997	0.787014	173	4
BDH1	-0.36595	7.37338e-07	5.1712e-06	173	173
BDH2	-0.389909	1.14123e-07	9.7125e-07	173	173
BDKRB1	0.0024485	0.974495	0.982375	173	15
BDKRB2	0.0163499	0.830933	0.886865	173	47
BDNFOS	-0.265313	0.000419059	0.00149566	173	173
BDNF	-0.211426	0.00523259	0.0139211	173	171
BDP1	-0.392789	9.02762e-08	7.88366e-07	173	173
BEAN	0.348796	2.56384e-06	1.5814e-05	173	172
BECN1	0.230657	0.00226492	0.00668712	173	173
BEGAIN	0.26835	0.000357373	0.00130154	173	172
BEND2	-0.0844385	0.26936	0.383802	173	76
BEND3	-0.561218	9.63318e-16	4.6031e-14	173	173
BEND4	-0.0780849	0.307178	0.425826	173	173
BEND5	-0.354693	1.68422e-06	1.08352e-05	173	173
BEND6	-0.207314	0.00620363	0.0161813	173	162
BEND7	-0.0545486	0.475966	0.595279	173	122
BEST1	0.441746	1.17208e-09	1.60074e-08	173	173
BEST2	-0.0653177	0.393214	0.515833	173	154
BEST3	-0.28493	0.000144952	0.000584256	173	154
BEST4	0.0559136	0.464981	0.584926	173	171
BET1L	-0.050239	0.511557	0.627721	173	173
BET1	-0.166976	0.0281102	0.0594096	173	173
BET3L	0.0242076	0.751897	0.827742	173	44
BEX1	0.137748	0.0707181	0.129114	173	154
BEX2	0.132397	0.0824875	0.146812	173	168
BEX4	-0.0877708	0.250847	0.362885	173	173
BEX5	-0.0361819	0.636497	0.736554	173	122
BEYLA	0.133952	0.0789158	0.141452	173	6
BFAR	-0.363702	8.71784e-07	6.00583e-06	173	173
BFSP1	0.102293	0.180501	0.278293	173	143
BFSP2	0.0547787	0.474105	0.593563	173	89
BGLAP	0.150771	0.0476991	0.0929366	173	173
BGN	-0.148809	0.0507037	0.097671	173	144
BHLHA15	0.0196744	0.797237	0.861801	173	167
BHLHB9	-0.0820746	0.283043	0.399377	173	172
BHLHE22	-0.110748	0.1469	0.234886	173	72
BHLHE23	-0.176896	0.0198998	0.044245	173	56
BHLHE40	0.352024	2.0392e-06	1.28761e-05	173	173
BHLHE41	-0.0316833	0.679012	0.770535	173	171
BHMT2	-0.326467	1.16739e-05	6.16604e-05	173	97
BHMT	-0.226771	0.00269741	0.0077821	173	101
BICC1	-0.0684856	0.370622	0.492612	173	119
BICD1	-0.34179	4.17789e-06	2.46891e-05	173	173
BICD2	0.229275	0.00241096	0.00706363	173	173
BID	0.485071	1.34883e-11	2.76079e-10	173	173
BIK	0.110776	0.146798	0.234761	173	173
BIN1	-0.109741	0.150634	0.239635	173	173
BIN2	0.549916	4.64366e-15	1.98894e-13	173	173
BIN3	0.129469	0.0895626	0.15709	173	173
BIRC2	0.0376414	0.622945	0.725625	173	173
BIRC3	0.246229	0.00109237	0.00351204	173	173
BIRC5	-0.217206	0.00409774	0.0112275	173	173
BIRC6	-0.267903	0.000365898	0.0013286	173	173
BIRC7	-0.0226536	0.767352	0.840144	173	50
BIRC8	-0.136874	0.0725411	0.131898	173	3
BIVM	-0.295893	7.73316e-05	0.000331974	173	173
BLCAP	0.228404	0.0025073	0.00729641	173	173
BLID	-0.28022	0.000188396	0.000737906	173	46
BLK	-0.0315186	0.680589	0.771842	173	173
BLMH	-0.254085	0.000742804	0.00249081	173	173
BLM	-0.336932	5.82135e-06	3.31131e-05	173	173
BLNK	0.263925	0.000450405	0.00159426	173	173
BLOC1S1	0.573542	1.61736e-16	9.1972e-15	173	173
BLOC1S2	0.492123	6.13565e-12	1.33504e-10	173	173
BLOC1S3	0.408177	2.48191e-08	2.47783e-07	173	173
BLVRA	0.18518	0.0147225	0.034196	173	173
BLVRB	0.376688	3.25489e-07	2.49905e-06	173	173
BLZF1	-0.548545	5.59706e-15	2.33087e-13	173	173
BMF	0.351529	2.11232e-06	1.32903e-05	173	173
BMI1	-0.132208	0.0829285	0.147462	173	173
BMP10	-0.171014	0.0244726	0.0528649	173	92
BMP1	-0.181806	0.0166689	0.0379999	173	173
BMP2K	-0.218815	0.00382396	0.0105622	173	173
BMP2	0.170428	0.024974	0.0537749	173	137
BMP3	-0.28222	0.000168643	0.000668659	173	112
BMP4	-0.404524	3.3922e-08	3.2643e-07	173	129
BMP5	-0.172047	0.0236092	0.0512331	173	101
BMP6	-0.200364	0.00821436	0.0206458	173	173
BMP7	-0.0911936	0.232769	0.341755	173	8
BMP8A	0.000888763	0.990741	0.993448	173	173
BMP8B	0.140035	0.0661241	0.12194	173	173
BMPER	-0.18367	0.0155674	0.0359395	173	117
BMPR1A	0.176442	0.0202243	0.0448487	173	171
BMPR1B	-0.0523545	0.493916	0.610992	173	117
BMPR2	0.165687	0.0293648	0.0615859	173	173
BMS1P4	-0.0918788	0.229262	0.337464	173	173
BMS1P5	-0.368005	6.31956e-07	4.50854e-06	173	173
BMS1	-0.509645	8.00001e-13	2.15491e-11	173	173
BMX	-0.129718	0.0889433	0.156201	173	134
BNC1	-0.23729	0.00166964	0.00511758	173	52
BNC2	-0.181973	0.0165675	0.037813	173	168
BNIP1	0.00771564	0.91975	0.947119	173	173
BNIP2	-0.154688	0.042144	0.0838826	173	173
BNIP3L	0.0341005	0.656031	0.752745	173	173
BNIP3	-0.258322	0.000600275	0.00206002	173	173
BNIPL	-0.193332	0.0108176	0.026255	173	173
BOC	-0.0871776	0.254077	0.366692	173	172
BOD1L	-0.0915309	0.231038	0.339522	173	173
BOD1	-0.37414	3.96255e-07	2.97658e-06	173	173
BOK	-0.190112	0.012235	0.0291995	173	172
BOLA1	-0.151544	0.0465569	0.0911241	173	173
BOLA2	0.0468551	0.540438	0.653228	173	173
BOLA3	-0.271528	0.000301936	0.00111848	173	173
BOLL	-0.111891	0.142747	0.229509	173	156
BOP1	-0.103258	0.176403	0.273143	173	173
BPESC1	-0.181122	0.0170898	0.0388182	173	24
BPGM	-0.137667	0.0708852	0.129383	173	173
BPHL	-0.31264	2.81676e-05	0.000134761	173	173
BPIL2	-0.123086	0.10667	0.181007	173	9
BPI	0.321558	1.60391e-05	8.18068e-05	173	160
BPNT1	-0.183206	0.0158355	0.0364589	173	173
BPTF	-0.394687	7.72572e-08	6.84821e-07	173	173
BRAF	-0.282713	0.000164082	0.000652705	173	173
BRAP	-0.198353	0.00889515	0.0221305	173	173
BRCA1	-0.277301	0.000221111	0.000851014	173	173
BRCA2	-0.219708	0.00367917	0.0102218	173	173
BRCC3	-0.0264419	0.729848	0.810813	173	173
BRD1	-0.158182	0.0376557	0.0761176	173	173
BRD2	-0.00400278	0.958316	0.972163	173	173
BRD3	-0.237117	0.0016832	0.0051559	173	173
BRD4	0.0188951	0.805105	0.867834	173	173
BRD7P3	0.261347	0.000514442	0.00179202	173	173
BRD7	-0.312823	2.78504e-05	0.00013344	173	173
BRD8	-0.327141	1.11711e-05	5.93108e-05	173	173
BRD9	-0.0216819	0.777064	0.847646	173	173
BRDT	0.0379525	0.620073	0.722972	173	16
BREA2	-0.0375299	0.623976	0.726434	173	172
BRE	0.209098	0.00576415	0.0151508	173	173
BRF1	0.125952	0.0986948	0.16968	173	173
BRF2	-0.0740359	0.333014	0.453566	173	173
BRI3BP	-0.0726855	0.341932	0.462892	173	173
BRI3	0.607774	7.52482e-19	6.59202e-17	173	173
BRIP1	-0.316413	2.22449e-05	0.000109275	173	173
BRIX1	-0.518614	2.69372e-13	7.94954e-12	173	173
BRMS1L	-0.443923	9.50305e-10	1.31823e-08	173	173
BRMS1	0.303857	4.82053e-05	0.000217517	173	173
BRP44L	-0.00131894	0.986259	0.990794	173	173
BRP44	-0.322778	1.48296e-05	7.63788e-05	173	173
BRPF1	-0.281726	0.000173331	0.000685013	173	173
BRPF3	-0.242103	0.00133122	0.00419671	173	173
BRS3	0.0429629	0.574626	0.683409	173	33
BRSK1	-0.229004	0.00244051	0.00713408	173	172
BRSK2	-0.0370203	0.628697	0.730444	173	173
BRWD1	-0.3819	2.16517e-07	1.73213e-06	173	173
BRWD3	-0.100692	0.187455	0.286764	173	173
BSCL2	-0.191149	0.0117616	0.0282674	173	173
BSDC1	-0.41686	1.16314e-08	1.25881e-07	173	173
BSG	0.0226988	0.766902	0.839779	173	173
BSND	0.239513	0.00150465	0.0046693	173	34
BSN	0.00604411	0.937094	0.958131	173	173
BSPRY	-0.285894	0.0001373	0.000556989	173	173
BST1	0.522244	1.71798e-13	5.25334e-12	173	172
BST2	0.314363	2.52996e-05	0.000122395	173	173
BTAF1	-0.0184818	0.809285	0.870481	173	173
BTBD10	0.0800977	0.294838	0.412222	173	173
BTBD11	-0.20505	0.00680419	0.0175292	173	173
BTBD12	-0.0620858	0.417093	0.539533	173	173
BTBD17	0.100562	0.188029	0.287438	173	39
BTBD18	-0.320193	1.75038e-05	8.8419e-05	173	173
BTBD19	0.311936	2.94257e-05	0.00014016	173	173
BTBD1	-0.149713	0.0492996	0.0955375	173	173
BTBD2	-0.00913676	0.905032	0.936177	173	173
BTBD3	-0.341964	4.12829e-06	2.4433e-05	173	173
BTBD6	0.0880512	0.249331	0.36103	173	173
BTBD7	-0.231912	0.00213931	0.00636069	173	173
BTBD8	-0.215957	0.00432232	0.0117534	173	171
BTBD9	0.15964	0.035906	0.0731203	173	173
BTC	-0.0810292	0.28924	0.405942	173	49
BTD	-0.0972709	0.202966	0.306348	173	173
BTF3L1	-0.0896659	0.240721	0.351125	173	49
BTF3L4	-0.466256	1.01267e-10	1.75685e-09	173	173
BTF3	-0.292844	9.23312e-05	0.000388502	173	173
BTG1	0.330755	8.80533e-06	4.78485e-05	173	173
BTG2	0.375848	3.47363e-07	2.64404e-06	173	173
BTG3	-0.104997	0.169191	0.264036	173	173
BTG4	-0.0261707	0.732512	0.812705	173	6
BTK	-0.0584224	0.44516	0.56633	173	173
BTLA	-0.0662982	0.386134	0.508397	173	173
BTN1A1	0.0826869	0.279455	0.395289	173	140
BTN2A1	0.445457	8.1899e-10	1.15085e-08	173	173
BTN2A2	0.215893	0.00433416	0.0117807	173	173
BTN2A3	0.159539	0.0360251	0.0733398	173	173
BTN3A1	-0.0363829	0.634623	0.735045	173	173
BTN3A2	-0.0286012	0.708747	0.794771	173	173
BTN3A3	-0.0188916	0.80514	0.867834	173	173
BTNL2	-0.0947851	0.214805	0.320584	173	50
BTNL3	-0.0576321	0.451352	0.572223	173	71
BTNL8	-0.082897	0.27823	0.393888	173	134
BTNL9	-0.121059	0.112607	0.188987	173	161
BTRC	-0.378934	2.73292e-07	2.13625e-06	173	173
BUB1B	-0.299487	6.25838e-05	0.000275058	173	173
BUB1	-0.382748	2.02482e-07	1.6333e-06	173	173
BUB3	-0.347616	2.78603e-06	1.70493e-05	173	173
BUD13	-0.127239	0.0952718	0.165197	173	173
BUD31	0.023519	0.758734	0.833193	173	173
BVES	0.122784	0.107538	0.1822	173	124
BYSL	-0.333981	7.10183e-06	3.95749e-05	173	173
BZRAP1	-0.274645	0.000255406	0.000963558	173	173
BZW1	-0.210625	0.00541026	0.0143428	173	173
BZW2	-0.380609	2.39677e-07	1.89259e-06	173	173
C10orf105	0.623121	5.45261e-20	6.02513e-18	173	173
C10orf107	-0.0809911	0.289468	0.406233	173	32
C10orf108	-0.0947865	0.214798	0.320584	173	61
C10orf10	0.395267	7.36493e-08	6.5583e-07	173	173
C10orf110	-0.066384	0.385519	0.507862	173	173
C10orf111	-0.168463	0.0267202	0.0569735	173	172
C10orf113	0.0409157	0.593006	0.699763	173	7
C10orf114	0.120872	0.113168	0.189863	173	162
C10orf116	0.10378	0.174213	0.270312	173	160
C10orf118	-0.0569335	0.456866	0.577248	173	173
C10orf119	0.343167	3.79927e-06	2.26443e-05	173	173
C10orf11	0.135606	0.0752538	0.136004	173	171
C10orf125	0.0795587	0.298109	0.41569	173	173
C10orf128	0.17924	0.0182951	0.0411144	173	170
C10orf129	-0.102615	0.179124	0.276476	173	93
C10orf12	-0.115707	0.129532	0.211978	173	173
C10orf131	-0.102305	0.180448	0.278252	173	165
C10orf137	-0.326924	1.13306e-05	6.00263e-05	173	173
C10orf140	0.256465	0.000659321	0.00224091	173	169
C10orf18	-0.35707	1.41832e-06	9.29047e-06	173	173
C10orf25	-0.0767539	0.315522	0.435042	173	173
C10orf26	0.252256	0.000813474	0.00270666	173	173
C10orf27	-0.106041	0.164966	0.258709	173	84
C10orf28	0.25915	0.000575549	0.00198086	173	173
C10orf2	-0.469515	7.20473e-11	1.28195e-09	173	173
C10orf32	0.0545602	0.475873	0.595201	173	173
C10orf35	-0.0439329	0.566011	0.675698	173	140
C10orf41	0.306191	4.18607e-05	0.00019178	173	156
C10orf46	-0.121326	0.111812	0.187961	173	173
C10orf47	-0.292832	9.23986e-05	0.000388618	173	173
C10orf4	-0.396653	6.56751e-08	5.93241e-07	173	173
C10orf50	0.188442	0.0130326	0.0307892	173	173
C10orf53	-0.226068	0.00278325	0.00799066	173	11
C10orf54	0.838494	5.9156e-47	3.83489e-43	173	173
C10orf55	-0.195347	0.0100058	0.0245511	173	166
C10orf57	-0.180681	0.0173656	0.039307	173	173
C10orf58	-0.0936483	0.220381	0.327123	173	168
C10orf62	-0.0196384	0.7976	0.862049	173	28
C10orf67	0.0122856	0.872545	0.913947	173	17
C10orf68	-0.415921	1.26376e-08	1.35788e-07	173	171
C10orf71	-0.159868	0.0356394	0.0726688	173	16
C10orf72	0.143956	0.058815	0.110644	173	166
C10orf75	-0.153912	0.0431988	0.0856664	173	173
C10orf76	0.31962	1.8155e-05	9.12114e-05	173	173
C10orf78	-0.194373	0.0103913	0.0253594	173	173
C10orf79	-0.0444205	0.561705	0.672	173	171
C10orf81	-0.129989	0.0882712	0.155245	173	142
C10orf82	-0.0578935	0.449299	0.570475	173	19
C10orf84	-0.0686088	0.36976	0.491699	173	173
C10orf88	-0.309306	3.46102e-05	0.000161959	173	173
C10orf90	0.0476974	0.533174	0.646861	173	19
C10orf91	0.407976	2.52516e-08	2.51713e-07	173	170
C10orf93	-0.0339147	0.657786	0.753735	173	37
C10orf95	-0.138324	0.0695377	0.127378	173	172
C11orf10	-0.0798287	0.296468	0.413953	173	173
C11orf16	-0.19143	0.0116359	0.0280068	173	138
C11orf17	-0.108764	0.154324	0.244525	173	173
C11orf1	-0.304811	4.55117e-05	0.000206609	173	173
C11orf20	-0.0741751	0.332104	0.452686	173	40
C11orf21	0.437407	1.77242e-09	2.33063e-08	173	173
C11orf24	0.174769	0.0214604	0.0471489	173	173
C11orf2	-0.0335109	0.661607	0.756834	173	173
C11orf30	-0.260983	0.000524123	0.00182216	173	173
C11orf31	0.0366106	0.632503	0.733508	173	173
C11orf34	-0.202831	0.00744256	0.0189702	173	171
C11orf35	0.498199	3.06737e-12	7.13835e-11	173	169
C11orf36	-0.073333	0.337637	0.458353	173	5
C11orf41	-0.148916	0.050535	0.0974232	173	86
C11orf42	0.0800557	0.295092	0.412429	173	151
C11orf45	0.125069	0.101099	0.173125	173	172
C11orf46	-0.0914605	0.231398	0.339974	173	173
C11orf48	0.0527191	0.490909	0.608322	173	173
C11orf49	-0.313456	2.67735e-05	0.000128693	173	173
C11orf51	0.21994	0.00364238	0.0101297	173	173
C11orf52	-0.000310148	0.996769	0.997589	173	36
C11orf53	-0.13937	0.0674333	0.124107	173	16
C11orf54	-0.493285	5.37958e-12	1.1916e-10	173	173
C11orf57	-0.454195	3.46202e-10	5.33513e-09	173	173
C11orf58	-0.278504	0.000207039	0.000801613	173	173
C11orf59	0.178872	0.0185399	0.0415779	173	173
C11orf61	0.0110585	0.885183	0.922267	173	173
C11orf63	0.231727	0.00215739	0.00640857	173	172
C11orf65	0.0721998	0.345176	0.466223	173	173
C11orf66	0.0212847	0.781044	0.850394	173	172
C11orf67	0.028261	0.712058	0.797557	173	173
C11orf68	0.0440653	0.56484	0.674667	173	173
C11orf70	-0.0801322	0.294629	0.412019	173	16
C11orf71	-0.0336559	0.660234	0.755708	173	173
C11orf73	-0.242263	0.00132112	0.00416893	173	173
C11orf74	-0.168882	0.0263392	0.0562557	173	173
C11orf75	0.578779	7.4047e-17	4.43097e-15	173	173
C11orf80	-0.258814	0.000585477	0.00201315	173	173
C11orf82	-0.0520013	0.496839	0.61384	173	173
C11orf83	0.0463929	0.544444	0.656805	173	173
C11orf84	0.034535	0.651933	0.749487	173	173
C11orf85	0.0872658	0.253595	0.366138	173	24
C11orf86	0.0736963	0.335243	0.455773	173	4
C11orf87	-0.0838148	0.272926	0.387896	173	87
C11orf88	-0.178118	0.0190492	0.0425679	173	40
C11orf90	-0.116255	0.127715	0.209692	173	34
C11orf92	-0.0946825	0.215304	0.321156	173	138
C11orf93	-0.0179397	0.814777	0.874491	173	66
C11orf94	0.000239665	0.997503	0.998119	173	21
C11orf95	-0.473309	4.82519e-11	8.89481e-10	173	173
C11orf9	-0.2458	0.00111525	0.00357968	173	173
C12orf10	0.0752644	0.325032	0.445471	173	173
C12orf11	-0.631323	1.2625e-20	1.54423e-18	173	173
C12orf12	-0.0330675	0.665814	0.76035	173	4
C12orf23	-0.506632	1.14512e-12	2.97334e-11	173	173
C12orf24	-0.525051	1.20889e-13	3.84159e-12	173	173
C12orf26	-0.111453	0.144328	0.231459	173	173
C12orf27	0.0573468	0.453599	0.574275	173	54
C12orf29	-0.436717	1.89187e-09	2.47024e-08	173	173
C12orf32	-0.119313	0.117927	0.196524	173	173
C12orf34	-0.101551	0.183698	0.282214	173	173
C12orf35	0.0395363	0.60554	0.710843	173	173
C12orf36	-0.0252605	0.74148	0.819661	173	4
C12orf39	0.063095	0.409547	0.53202	173	42
C12orf40	-0.0690103	0.366959	0.488241	173	111
C12orf41	-0.268793	0.000349115	0.00127672	173	173
C12orf42	-0.199462	0.00851368	0.0213039	173	146
C12orf43	-0.187272	0.0136178	0.0319507	173	173
C12orf44	0.265731	0.000410016	0.0014677	173	173
C12orf45	-0.0825712	0.28013	0.396044	173	173
C12orf47	-0.0517389	0.499016	0.615869	173	173
C12orf48	-0.311265	3.06744e-05	0.000145395	173	173
C12orf49	-0.078586	0.304075	0.422826	173	173
C12orf4	-0.0429525	0.574719	0.68345	173	173
C12orf50	-0.0753654	0.324382	0.444798	173	134
C12orf51	-0.255111	0.000705668	0.00237807	173	173
C12orf52	-0.110558	0.147598	0.235692	173	173
C12orf53	-0.0215287	0.778599	0.848635	173	170
C12orf54	-0.0440246	0.5652	0.674978	173	15
C12orf56	-0.0276689	0.717832	0.801861	173	26
C12orf57	-0.193899	0.0105833	0.025757	173	173
C12orf59	0.0443432	0.562386	0.672567	173	169
C12orf5	0.48892	8.79491e-12	1.85513e-10	173	173
C12orf60	-0.188096	0.0132032	0.0311168	173	172
C12orf61	-0.0395568	0.605352	0.710722	173	173
C12orf62	0.251874	0.00082901	0.00275082	173	173
C12orf63	-0.0919064	0.229122	0.337292	173	86
C12orf65	-0.395574	7.18074e-08	6.4119e-07	173	173
C12orf66	-0.353356	1.85395e-06	1.18293e-05	173	173
C12orf68	-0.106071	0.164846	0.258583	173	95
C12orf69	-0.0670054	0.381077	0.503306	173	158
C12orf70	0.144662	0.0575733	0.108697	173	114
C12orf71	-0.281925	0.000171433	0.00067806	173	170
C12orf72	-0.166906	0.028177	0.0595185	173	173
C12orf73	-0.553357	2.89455e-15	1.28817e-13	173	173
C12orf74	-0.0104594	0.891364	0.926436	173	60
C12orf75	-0.370342	5.29628e-07	3.85776e-06	173	173
C12orf76	-0.105673	0.166445	0.260609	173	173
C12orf77	0.0187285	0.806789	0.868739	173	24
C13orf15	-0.0457458	0.550079	0.661387	173	173
C13orf16	0.0149389	0.845332	0.896209	173	99
C13orf18	0.180243	0.017644	0.0398622	173	173
C13orf1	-0.357337	1.39113e-06	9.14013e-06	173	173
C13orf23	-0.10453	0.171104	0.266339	173	173
C13orf27	-0.496121	3.89407e-12	8.85752e-11	173	173
C13orf29	0.0216477	0.777407	0.847859	173	145
C13orf30	-0.252091	0.000820129	0.00272554	173	23
C13orf31	0.297799	6.91466e-05	0.000300775	173	173
C13orf33	-0.060964	0.425576	0.547793	173	50
C13orf34	-0.310337	3.24841e-05	0.000153115	173	173
C13orf35	0.176062	0.0204999	0.0453099	173	120
C13orf36	0.0554158	0.468971	0.588575	173	102
C13orf37	-0.242616	0.00129914	0.00410691	173	173
C13orf38	-0.340446	4.58229e-06	2.68181e-05	173	171
C13orf39	-0.167646	0.0274766	0.0583369	173	113
C14orf101	-0.408545	2.40441e-08	2.41285e-07	173	173
C14orf102	-0.256477	0.000658914	0.00223992	173	173
C14orf104	-0.489769	7.99658e-12	1.69409e-10	173	173
C14orf105	0.0398739	0.602462	0.708341	173	123
C14orf106	-0.316363	2.23147e-05	0.000109563	173	173
C14orf109	0.116884	0.125653	0.206953	173	173
C14orf115	-0.0285171	0.709565	0.795505	173	11
C14orf118	-0.27081	0.000313723	0.00115862	173	173
C14orf119	0.0069294	0.927904	0.95244	173	173
C14orf126	-0.517954	2.92143e-13	8.55662e-12	173	173
C14orf128	-0.262529	0.000484088	0.00169968	173	155
C14orf129	0.0895495	0.241335	0.351776	173	173
C14orf132	-0.0536913	0.482938	0.601446	173	158
C14orf135	-0.549751	4.74905e-15	2.02099e-13	173	173
C14orf138	-0.0364778	0.633739	0.734396	173	173
C14orf139	0.146779	0.0539755	0.103014	173	173
C14orf142	-0.0123399	0.871987	0.913559	173	173
C14orf143	-0.171662	0.0239277	0.0518202	173	173
C14orf145	-0.244541	0.0011849	0.00378577	173	173
C14orf147	0.171073	0.0244226	0.0527804	173	173
C14orf148	-0.272933	0.000280064	0.00104543	173	173
C14orf149	-0.176944	0.0198663	0.0441857	173	173
C14orf153	-0.136013	0.074374	0.134639	173	173
C14orf156	0.0353397	0.644371	0.74283	173	173
C14orf159	-0.0544586	0.476696	0.595923	173	173
C14orf162	-0.00137176	0.985709	0.990394	173	13
C14orf165	0.0874178	0.252766	0.365188	173	47
C14orf166B	0.454686	3.29618e-10	5.11197e-09	173	84
C14orf166	-0.217481	0.00404968	0.0111037	173	173
C14orf167	0.0163269	0.831168	0.886993	173	173
C14orf169	-0.283864	0.000153875	0.000616133	173	173
C14orf174	-0.274957	0.000251133	0.000950017	173	173
C14orf176	-0.0221371	0.77251	0.844076	173	167
C14orf178	-0.167324	0.0277792	0.0588252	173	171
C14orf179	-0.0931295	0.222959	0.330043	173	173
C14orf180	-0.00284081	0.97041	0.980733	173	19
C14orf181	0.000209586	0.997816	0.998227	173	172
C14orf182	0.079448	0.298785	0.416423	173	173
C14orf183	0.180959	0.017191	0.0389754	173	160
C14orf184	-0.0517221	0.499156	0.616003	173	98
C14orf19	-0.208623	0.00587846	0.0154128	173	173
C14orf1	-0.300385	5.93373e-05	0.000262271	173	173
C14orf21	0.175568	0.0208623	0.0460063	173	173
C14orf23	-0.122136	0.109421	0.184757	173	6
C14orf28	-0.226447	0.00273663	0.00787773	173	173
C14orf2	0.0495535	0.517343	0.632546	173	173
C14orf33	-0.488224	9.50513e-12	1.99844e-10	173	173
C14orf34	-0.0628018	0.411731	0.534144	173	101
C14orf37	-0.258568	0.000592816	0.00203586	173	166
C14orf39	-0.144228	0.058334	0.109898	173	31
C14orf43	0.0239631	0.754322	0.82966	173	173
C14orf45	-0.549323	5.03451e-15	2.11929e-13	173	173
C14orf48	0.0505577	0.508879	0.625264	173	22
C14orf49	0.145222	0.0566031	0.107208	173	173
C14orf4	0.433136	2.64803e-09	3.33542e-08	173	173
C14orf50	-0.251449	0.000846579	0.00280052	173	130
C14orf53	-0.0212321	0.781572	0.85081	173	39
C14orf64	-0.243368	0.00125334	0.0039822	173	172
C14orf68	0.285254	0.000142334	0.000574653	173	124
C14orf70	-0.0743278	0.331107	0.451537	173	26
C14orf72	0.103892	0.173747	0.269697	173	71
C14orf73	0.249842	0.00091619	0.00300575	173	117
C14orf79	-0.386228	1.5351e-07	1.27149e-06	173	173
C14orf80	0.45542	3.06237e-10	4.77219e-09	173	173
C14orf86	0.0152571	0.842081	0.894574	173	12
C14orf93	0.00787504	0.918097	0.945618	173	173
C15orf17	-0.1597	0.0358354	0.0729997	173	173
C15orf21	0.0536317	0.483424	0.601859	173	173
C15orf23	-0.156193	0.0401586	0.0804993	173	173
C15orf24	0.0692258	0.365461	0.486781	173	173
C15orf26	-0.0643343	0.400391	0.523026	173	139
C15orf27	-0.144794	0.057342	0.1084	173	173
C15orf28	0.0247564	0.746461	0.823309	173	173
C15orf29	-0.362847	9.28808e-07	6.36118e-06	173	173
C15orf2	-0.0419281	0.583884	0.691726	173	20
C15orf33	-0.45515	3.14648e-10	4.8915e-09	173	171
C15orf34	0.375001	3.70834e-07	2.80185e-06	173	173
C15orf37	0.31318	2.72379e-05	0.000130763	173	173
C15orf38	0.221945	0.00333804	0.00938168	173	158
C15orf39	0.310713	3.17386e-05	0.000150037	173	173
C15orf40	-0.0696559	0.362483	0.483874	173	173
C15orf41	-0.262973	0.000473144	0.00166517	173	173
C15orf42	-0.239078	0.00153569	0.00475652	173	173
C15orf43	-0.32047	1.71966e-05	8.71165e-05	173	26
C15orf44	-0.548976	5.27815e-15	2.20752e-13	173	173
C15orf48	0.299381	6.29788e-05	0.000276544	173	122
C15orf50	0.18111	0.0170971	0.0388265	173	24
C15orf51	-0.3622	9.74272e-07	6.65063e-06	173	173
C15orf52	0.0884522	0.247173	0.358519	173	173
C15orf53	-0.0947139	0.215152	0.321027	173	106
C15orf54	0.0147901	0.846854	0.897282	173	71
C15orf55	-0.182429	0.0162933	0.0373053	173	164
C15orf56	-0.018799	0.806076	0.868294	173	156
C15orf57	0.222322	0.00328353	0.00924407	173	173
C15orf58	0.145386	0.0563212	0.106749	173	173
C15orf59	-0.0928597	0.224308	0.331586	173	32
C15orf5	-0.195724	0.00986025	0.0242277	173	173
C15orf60	0.109824	0.150321	0.239234	173	78
C15orf61	-0.027329	0.721153	0.804483	173	173
C15orf62	0.0895747	0.241202	0.351641	173	173
C15orf63	-0.0674566	0.377871	0.500159	173	173
C16orf11	-0.242796	0.00128803	0.00407644	173	94
C16orf13	0.144665	0.0575674	0.108697	173	173
C16orf3	-0.304168	4.73121e-05	0.000214182	173	168
C16orf42	0.15221	0.0455914	0.0895528	173	173
C16orf45	0.329803	9.37756e-06	5.05474e-05	173	173
C16orf46	-0.412547	1.69941e-08	1.76928e-07	173	173
C16orf48	0.00563877	0.941305	0.960936	173	173
C16orf52	-0.0849307	0.266568	0.380969	173	173
C16orf53	0.0529944	0.488645	0.606224	173	173
C16orf54	0.327683	1.07816e-05	5.73838e-05	173	173
C16orf55	-0.149112	0.0502296	0.0969112	173	173
C16orf57	0.48259	1.77215e-11	3.524e-10	173	173
C16orf58	-0.222846	0.00320894	0.0090669	173	173
C16orf59	-0.0557778	0.466068	0.585839	173	173
C16orf5	-0.216289	0.00426159	0.0116104	173	173
C16orf61	-0.0151999	0.842665	0.894892	173	173
C16orf62	0.0956077	0.210834	0.315675	173	173
C16orf63	-0.402141	4.15103e-08	3.93226e-07	173	173
C16orf68	-0.00798339	0.916975	0.944662	173	173
C16orf70	0.169947	0.0253916	0.0545473	173	173
C16orf71	-0.0624912	0.414053	0.53644	173	173
C16orf72	0.318578	1.93986e-05	9.68338e-05	173	173
C16orf73	-0.0358052	0.640013	0.739176	173	118
C16orf74	0.202187	0.00763756	0.0194037	173	173
C16orf75	-0.0382468	0.617361	0.720934	173	173
C16orf79	0.238569	0.00157278	0.00485283	173	173
C16orf7	0.426046	5.09421e-09	6.02628e-08	173	173
C16orf80	-0.313548	2.66211e-05	0.00012815	173	173
C16orf81	-0.0838788	0.272558	0.387536	173	165
C16orf86	0.226588	0.00271956	0.00783787	173	173
C16orf87	-0.152516	0.0451536	0.0888993	173	173
C16orf88	-0.339142	5.00946e-06	2.89866e-05	173	173
C16orf89	-0.0502399	0.511549	0.627721	173	157
C16orf90	-0.131507	0.0845875	0.149891	173	126
C16orf91	-0.045267	0.554265	0.665145	173	173
C16orf92	-0.0935289	0.220972	0.327695	173	28
C16orf93	-0.133981	0.0788491	0.141346	173	173
C17orf100	-0.102661	0.178931	0.276266	173	173
C17orf101	-0.137976	0.0702483	0.128425	173	173
C17orf102	0.0273155	0.721286	0.804483	173	5
C17orf103	0.0382378	0.617444	0.720978	173	173
C17orf104	-0.170017	0.0253311	0.0544353	173	173
C17orf105	0.10862	0.154872	0.245233	173	59
C17orf106	0.0506063	0.508471	0.625119	173	173
C17orf107	0.0754589	0.323781	0.444135	173	173
C17orf108	0.0756483	0.322564	0.442992	173	173
C17orf28	0.0250175	0.74388	0.821521	173	169
C17orf37	0.357077	1.41762e-06	9.28903e-06	173	173
C17orf39	-0.321098	1.65192e-05	8.39692e-05	173	173
C17orf42	-0.277592	0.000217623	0.000839083	173	173
C17orf44	0.252656	0.00079749	0.00265985	173	173
C17orf46	-0.283689	0.000155388	0.000621681	173	173
C17orf47	-0.150529	0.0480607	0.0935152	173	152
C17orf48	-0.383995	1.8343e-07	1.49574e-06	173	173
C17orf49	0.077599	0.310207	0.429266	173	173
C17orf50	-0.143962	0.0588037	0.110633	173	144
C17orf51	-0.0177795	0.816402	0.875816	173	173
C17orf53	-0.131898	0.0836599	0.148478	173	173
C17orf54	-0.0683293	0.371718	0.493762	173	101
C17orf55	0.634122	7.58665e-21	9.96926e-19	173	153
C17orf56	0.289017	0.000115022	0.00047363	173	173
C17orf57	-0.411115	1.92519e-08	1.97578e-07	173	173
C17orf58	-0.030063	0.694586	0.783362	173	173
C17orf59	0.330755	8.80553e-06	4.78485e-05	173	173
C17orf60	0.350697	2.24114e-06	1.40327e-05	173	173
C17orf61	-0.00452685	0.952864	0.968198	173	173
C17orf62	0.404893	3.28738e-08	3.18392e-07	173	173
C17orf63	-0.242538	0.00130394	0.00411939	173	173
C17orf64	-0.020247	0.791468	0.857854	173	103
C17orf65	0.123604	0.105192	0.179043	173	173
C17orf66	0.0324697	0.671502	0.765048	173	149
C17orf67	0.0761678	0.319243	0.439207	173	172
C17orf68	-0.0173718	0.820539	0.879317	173	173
C17orf69	-0.0626136	0.413136	0.535574	173	173
C17orf70	0.213827	0.00473084	0.0127343	173	173
C17orf71	-0.126918	0.0961163	0.166224	173	173
C17orf72	0.332227	7.98475e-06	4.39037e-05	173	173
C17orf73	-0.0984016	0.19774	0.29976	173	94
C17orf74	-0.0450454	0.556208	0.667128	173	20
C17orf75	-0.229733	0.00236158	0.00693986	173	173
C17orf76	-0.339868	4.76724e-06	2.77585e-05	173	173
C17orf77	0.524236	1.33923e-13	4.21446e-12	173	85
C17orf78	-0.306422	4.12771e-05	0.000189374	173	170
C17orf79	0.0147293	0.847476	0.89755	173	173
C17orf80	-0.417433	1.10558e-08	1.20321e-07	173	173
C17orf81	-0.0851926	0.265091	0.379276	173	173
C17orf82	-0.0842165	0.270626	0.385436	173	52
C17orf85	-0.104504	0.17121	0.26646	173	173
C17orf86	-0.113194	0.138123	0.223572	173	173
C17orf87	0.679098	9.7468e-25	2.2838e-22	173	173
C17orf88	0.0329753	0.66669	0.761126	173	115
C17orf89	0.0146492	0.848295	0.897998	173	173
C17orf90	0.104851	0.169789	0.264715	173	173
C17orf91	0.488032	9.71154e-12	2.03963e-10	173	173
C17orf95	-0.108661	0.154718	0.245039	173	173
C17orf96	0.108245	0.15631	0.247248	173	172
C17orf97	-0.289271	0.000113367	0.00046731	173	173
C17orf98	-0.0238076	0.755866	0.830841	173	44
C17orf99	-0.212289	0.00504695	0.0134826	173	163
C18orf10	-0.400399	4.80602e-08	4.47855e-07	173	173
C18orf16	-0.0100712	0.895373	0.929671	173	82
C18orf18	-0.145056	0.0568889	0.107666	173	173
C18orf19	-0.49326	5.3943e-12	1.1935e-10	173	173
C18orf1	-0.25955	0.000563943	0.00194538	173	173
C18orf20	-0.0470218	0.538996	0.652174	173	15
C18orf21	-0.0528159	0.490112	0.607579	173	173
C18orf22	-0.424721	5.74743e-09	6.70925e-08	173	173
C18orf25	-0.18952	0.0125125	0.0297486	173	173
C18orf26	-0.152572	0.0450737	0.0887869	173	53
C18orf2	-0.00272307	0.971636	0.981276	173	31
C18orf32	0.0139296	0.855665	0.90283	173	173
C18orf34	-0.146584	0.0542988	0.103509	173	6
[truncated: 17,450 more rows]

## Sheet: Table S4
The differentially expressed genes between the TNFAIP2 high and TNFAIP2 low group of AML patients
gene_name	gene_id	gene_biotype	baseMean	log2FoldChange	lfcSE	stat	pvalue	padj
TSPAN6	ENSG00000000003	protein_coding	20.5527	0.266147	0.300911	0.88447	0.376443	0.5455
TNMD	ENSG00000000005	protein_coding	0.299171	-0.57083	0.505498	-1.12924	0.258796
DPM1	ENSG00000000419	protein_coding	739.876	-0.059076	0.0597207	-0.989204	0.322563	0.491658
SCYL3	ENSG00000000457	protein_coding	852.037	-0.0211154	0.0546256	-0.386548	0.699091	0.813165
C1orf112	ENSG00000000460	protein_coding	706.965	-0.212519	0.0838767	-2.53371	0.0112864	0.0420326
FGR	ENSG00000000938	protein_coding	6258.52	2.55753	0.214334	11.9325	8.01572e-33	1.7756e-29
CFH	ENSG00000000971	protein_coding	633.654	-1.02857	0.325607	-3.15894	0.00158345	0.00904363
FUCA2	ENSG00000001036	protein_coding	1200.05	0.248326	0.107867	2.30214	0.0213271	0.0683389
GCLC	ENSG00000001084	protein_coding	1925.75	0.0770506	0.0910041	0.846672	0.397178	0.565612
NFYA	ENSG00000001167	protein_coding	2449.62	-0.312048	0.0626712	-4.97913	6.38719e-07	1.35913e-05
STPG1	ENSG00000001460	protein_coding	217.104	-0.453847	0.0937649	-4.84027	1.29662e-06	2.48139e-05
NIPAL3	ENSG00000001461	protein_coding	2112.41	-0.228002	0.063937	-3.56605	0.000362403	0.00275253
LAS1L	ENSG00000001497	protein_coding	1872.29	-0.0954483	0.0596509	-1.60011	0.109573	0.230319
ENPP4	ENSG00000001561	protein_coding	613.145	-0.27708	0.176437	-1.57042	0.116318	0.240547
SEMA3F	ENSG00000001617	protein_coding	57.473	-0.314229	0.247119	-1.27157	0.203525	0.357798
CFTR	ENSG00000001626	protein_coding	1.49533	-0.923008	0.382333	-2.41415	0.0157721	0.0542402
ANKIB1	ENSG00000001629	protein_coding	2245.2	-0.171917	0.0625453	-2.74868	0.00598362	0.0256773
CYP51A1	ENSG00000001630	protein_coding	73.1871	0.189674	0.105037	1.80577	0.0709541	0.166958
KRIT1	ENSG00000001631	protein_coding	2026.94	-0.182004	0.0608624	-2.99042	0.0027859	0.0141581
RAD52	ENSG00000002016	protein_coding	1467.47	0.0610061	0.0539384	1.13103	0.258042	0.421687
MYH16	ENSG00000002079	transcribed_unitary_pseudogene	25.9951	-0.589511	0.14499	-4.06587	4.78542e-05	0.000526076
BAD	ENSG00000002330	protein_coding	345.246	0.136657	0.0953471	1.43325	0.151785	0.291383
LAP3	ENSG00000002549	protein_coding	1938.31	0.516593	0.10742	4.8091	1.51609e-06	2.83646e-05
CD99	ENSG00000002586	protein_coding	8978.39	-0.317354	0.138326	-2.29425	0.0217763	0.0694419
HS3ST1	ENSG00000002587	protein_coding	83.8678	0.258477	0.336677	0.76773	0.442648	0.60778
AOC1	ENSG00000002726	protein_coding	107.451	0.198168	0.306449	0.64666	0.517852	0.672778
WNT16	ENSG00000002745	protein_coding	26.7369	0.0157406	0.150516	0.104578	0.916711	0.953953
HECW1	ENSG00000002746	protein_coding	4.25218	-0.0503337	0.186893	-0.269317	0.787685	0.873163
MAD1L1	ENSG00000002822	protein_coding	943.029	0.182161	0.0756371	2.40835	0.0160246	0.0548993
LASP1	ENSG00000002834	protein_coding	7758.51	0.216208	0.0730544	2.95955	0.0030809	0.0153337
SNX11	ENSG00000002919	protein_coding	934.348	0.557309	0.0799778	6.96829	3.20809e-12	2.33379e-10
TMEM176A	ENSG00000002933	protein_coding	400.837	2.01233	0.336543	5.97943	2.23926e-09	9.12657e-08
M6PR	ENSG00000003056	protein_coding	3768.44	0.183799	0.0601166	3.05738	0.00223285	0.0118725
KLHL13	ENSG00000003096	protein_coding	323.54	-0.741253	0.258774	-2.86448	0.00417691	0.0194298
CYP26B1	ENSG00000003137	protein_coding	4.83515	0.779347	0.335914	2.32008	0.0203365	0.0658843
ICA1	ENSG00000003147	protein_coding	446.387	-0.0480304	0.224515	-0.21393	0.830602	0.901783
DBNDD1	ENSG00000003249	protein_coding	49.2645	-0.998443	0.224932	-4.43886	9.04375e-06	0.000127641
ALS2	ENSG00000003393	protein_coding	2955.95	-0.79303	0.15103	-5.25079	1.51445e-07	3.84495e-06
CASP10	ENSG00000003400	protein_coding	2356.95	0.384617	0.0822632	4.67544	2.93325e-06	4.93926e-05
CFLAR	ENSG00000003402	protein_coding	10297.8	0.361469	0.0715722	5.0504	4.40875e-07	9.87966e-06
TFPI	ENSG00000003436	protein_coding	1814.76	-0.363324	0.228838	-1.58769	0.112356	0.234743
NDUFAF7	ENSG00000003509	protein_coding	609.834	0.0867681	0.0487731	1.77902	0.0752371	0.174469
RBM5	ENSG00000003756	protein_coding	9462.17	0.030121	0.0524789	0.573963	0.565993	0.712181
MTMR7	ENSG00000003987	protein_coding	436.083	-0.342651	0.108752	-3.15074	0.00162855	0.0092497
SLC7A2	ENSG00000003989	protein_coding	75.6562	-1.19795	0.332928	-3.59822	0.000320407	0.00249341
ARF5	ENSG00000004059	protein_coding	1652	0.259454	0.106626	2.43331	0.0149617	0.0520819
SARM1	ENSG00000004139	protein_coding	460.663	0.185659	0.148524	1.25002	0.211292	0.367078
POLDIP2	ENSG00000004142	protein_coding	1854.99	0.0630481	0.0614701	1.02567	0.305047	0.473131
PLXND1	ENSG00000004399	protein_coding	12568.7	-0.0278866	0.110038	-0.253428	0.799938	0.881685
AK2	ENSG00000004455	protein_coding	6627.44	0.202317	0.122856	1.64678	0.0996024	0.214834
CD38	ENSG00000004468	protein_coding	7439.6	-0.756773	0.172521	-4.38657	1.15155e-05	0.00015692
FKBP4	ENSG00000004478	protein_coding	3036.49	-0.390931	0.117849	-3.31721	0.000909204	0.00582509
KDM1A	ENSG00000004487	protein_coding	3796.71	-0.189437	0.0503501	-3.76241	0.000168286	0.00148163
RBM6	ENSG00000004534	protein_coding	5372.01	-0.030838	0.0506166	-0.609248	0.54236	0.693294
CAMKK1	ENSG00000004660	protein_coding	608.988	0.357759	0.12901	2.77312	0.00555222	0.0242269
RECQL	ENSG00000004700	protein_coding	979.454	0.231582	0.0813665	2.84616	0.00442497	0.0203191
VPS50	ENSG00000004766	protein_coding	822.39	-0.0786607	0.0832029	-0.945409	0.34445	0.513908
HSPB6	ENSG00000004776	protein_coding	18.2068	-0.377693	0.250128	-1.51	0.131044	0.262345
ARHGAP33	ENSG00000004777	protein_coding	1964.5	0.0782126	0.13358	0.585509	0.558206	0.705911
NDUFAB1	ENSG00000004779	protein_coding	706.727	-0.0473916	0.0728545	-0.650497	0.515371	0.67091
PDK4	ENSG00000004799	protein_coding	472.886	2.5055	0.314542	7.96556	1.64478e-15	2.256e-13
SLC22A16	ENSG00000004809	protein_coding	1123.84	-0.604014	0.118894	-5.08028	3.76871e-07	8.55793e-06
ZMYND10	ENSG00000004838	protein_coding	111.956	0.273745	0.13022	2.10217	0.0355383	0.100202
ABCB5	ENSG00000004846	protein_coding	4.80787	-0.817559	0.263476	-3.10297	0.00191588	0.0105049
ARX	ENSG00000004848	protein_coding	1.96517	-0.711714	0.241339	-2.94903	0.00318777	0.0157488
SLC25A13	ENSG00000004864	protein_coding	726.64	0.00133676	0.071087	0.0188046	0.984997	0.99226
ST7	ENSG00000004866	protein_coding	676.889	-0.204844	0.182646	-1.12154	0.262059	0.426306
CDC27	ENSG00000004897	protein_coding	2594.07	-0.185025	0.0684109	-2.70461	0.00683846	0.0284714
SLC4A1	ENSG00000004939	protein_coding	3884.33	-0.744716	0.338814	-2.19801	0.0279484	0.0836487
CALCR	ENSG00000004948	protein_coding	0.541743	-0.237516	0.371224	-0.639819	0.52229	0.676244
HCCS	ENSG00000004961	protein_coding	402.714	0.209043	0.0768432	2.72039	0.00652057	0.0274419
DVL2	ENSG00000004975	protein_coding	1173.96	-0.0606764	0.0839857	-0.722461	0.470011	0.63255
PRSS22	ENSG00000005001	protein_coding	1.60041	0.160884	0.262691	0.612447	0.540242	0.691364
UPF1	ENSG00000005007	protein_coding	3423.14	0.318502	0.0745481	4.27243	1.9335e-05	0.000243352
SKAP2	ENSG00000005020	protein_coding	3706.95	0.421032	0.18536	2.27143	0.0231209	0.0725597
SLC25A5	ENSG00000005022	protein_coding	6158.35	0.103535	0.0813291	1.27304	0.203005	0.357121
MCUB	ENSG00000005059	protein_coding	743.068	0.379947	0.120684	3.14828	0.00164236	0.00930812
HOXA11	ENSG00000005073	protein_coding	68.3022	1.36401	0.516319	2.6418	0.00824671	0.032897
POLR2J	ENSG00000005075	protein_coding	465.535	0.159062	0.100625	1.58073	0.113939	0.237277
DHX33	ENSG00000005100	protein_coding	1442.08	-0.316947	0.06474	-4.89568	9.79652e-07	1.94888e-05
MEOX1	ENSG00000005102	protein_coding	6.77147	0.328677	0.249982	1.3148	0.188577	0.33947
THSD7A	ENSG00000005108	protein_coding	645.831	-2.18293	0.44757	-4.87729	1.07553e-06	2.10093e-05
LIG3	ENSG00000005156	protein_coding	2226.66	-0.186611	0.0589703	-3.16449	0.00155357	0.00889835
RPAP3	ENSG00000005175	protein_coding	1235.04	-0.0879781	0.0641735	-1.37094	0.170393	0.315604
ACSM3	ENSG00000005187	protein_coding	2910.7	-1.26995	0.231843	-5.47764	4.31032e-08	1.26213e-06
REXO5	ENSG00000005189	protein_coding	932.482	-0.49901	0.106587	-4.68171	2.84488e-06	4.81057e-05
CIAPIN1	ENSG00000005194	protein_coding	1031.99	0.0928293	0.0599009	1.54971	0.12121	0.248242
SPPL2B	ENSG00000005206	protein_coding	3868.5	-0.0528279	0.126764	-0.416741	0.676868	0.796951
FAM214B	ENSG00000005238	protein_coding	1411.6	0.567098	0.110817	5.11741	3.09758e-07	7.24945e-06
COPZ2	ENSG00000005243	protein_coding	45.9179	0.774154	0.262709	2.94681	0.00321067	0.0158328
PRKAR2B	ENSG00000005249	protein_coding	1557.61	0.351007	0.223903	1.56768	0.116957	0.241576
MSL3	ENSG00000005302	protein_coding	2288.24	0.48705	0.0628415	7.75045	9.15665e-15	1.10236e-12
CREBBP	ENSG00000005339	protein_coding	8638.71	0.265783	0.0598328	4.44209	8.90898e-06	0.000126221
TSPOAP1	ENSG00000005379	protein_coding	10429.2	-0.473008	0.200858	-2.35494	0.0185258	0.06133
MPO	ENSG00000005381	protein_coding	220839	-1.69709	0.327544	-5.18126	2.20387e-07	5.34709e-06
PON1	ENSG00000005421	protein_coding	5.10679	0.274303	0.517034	0.530532	0.595743	0.735864
GCFC2	ENSG00000005436	protein_coding	782.477	-0.13849	0.081334	-1.70273	0.0886179	0.197061
WDR54	ENSG00000005448	protein_coding	322.303	0.140392	0.122048	1.1503	0.250021	0.412975
CROT	ENSG00000005469	protein_coding	280.377	-0.223514	0.0965994	-2.31382	0.0206776	0.0667697
ABCB4	ENSG00000005471	protein_coding	40.0127	-0.347532	0.202537	-1.7159	0.0861808	0.192998
KMT2E	ENSG00000005483	protein_coding	7329.18	-0.137809	0.0616195	-2.23645	0.0253221	0.0777438
RHBDD2	ENSG00000005486	protein_coding	996.037	0.159054	0.133733	1.18935	0.234304	0.394705
SOX8	ENSG00000005513	protein_coding	14.4621	0.286039	0.256874	1.11354	0.265478	0.430193
IBTK	ENSG00000005700	protein_coding	2768.94	-0.133849	0.0660407	-2.02677	0.0426864	0.114907
ZNF195	ENSG00000005801	protein_coding	1689.17	-0.354389	0.0763943	-4.63894	3.50196e-06	5.7462e-05
MYCBP2	ENSG00000005810	protein_coding	11496.4	-0.0491367	0.0862766	-0.569525	0.569	0.71472
FBXL3	ENSG00000005812	protein_coding	1900.55	-0.0799909	0.0610422	-1.31042	0.190054	0.341138
ITGAL	ENSG00000005844	protein_coding	10387	1.15883	0.147332	7.86545	3.67759e-15	4.66843e-13
PDK2	ENSG00000005882	protein_coding	575.282	0.103001	0.113169	0.910154	0.362741	0.532644
ITGA3	ENSG00000005884	protein_coding	120.627	0.138542	0.236924	0.584754	0.558713	0.706332
ZFX	ENSG00000005889	protein_coding	2688.3	-0.0407616	0.0741055	-0.550049	0.582286	0.72547
LAMP2	ENSG00000005893	protein_coding	7509.49	0.00109645	0.0723201	0.0151611	0.987904	0.994006
ITGA2B	ENSG00000005961	protein_coding	1337.13	-0.161069	0.262463	-0.613682	0.539426	0.69069
ASB4	ENSG00000005981	protein_coding	0.495006	0.11641	0.399191	0.291616	0.77058	0.862554
GDE1	ENSG00000006007	protein_coding	1930.16	0.0789727	0.0707833	1.1157	0.264551	0.429209
REX1BD	ENSG00000006015	protein_coding	805.871	0.328714	0.106245	3.09393	0.00197527	0.0107577
CRLF1	ENSG00000006016	protein_coding	89.731	0.0425111	0.0862743	0.492743	0.622194	0.755911
OSBPL7	ENSG00000006025	protein_coding	1450.11	0.200078	0.0861219	2.32319	0.020169	0.0654708
TMEM98	ENSG00000006042	protein_coding	24.1066	-0.106096	0.351946	-0.301456	0.763067	0.857458
YBX2	ENSG00000006047	protein_coding	19.3358	-0.465893	0.290366	-1.6045	0.108603	0.22892
KRT33A	ENSG00000006059	protein_coding	0.0636387	0.0105791	1.59298	0.0066411	0.994701
MAP3K14	ENSG00000006062	protein_coding	1032.27	0.750258	0.0976072	7.6865	1.51211e-14	1.72657e-12
ABCC8	ENSG00000006071	protein_coding	9.59106	-1.75276	0.356296	-4.91939	8.68129e-07	1.76183e-05
CACNG3	ENSG00000006116	protein_coding	1.21034	-0.0814614	0.2754	-0.295793	0.767388	0.860241
TMEM132A	ENSG00000006118	protein_coding	44.0651	1.82739	0.217322	8.40867	4.1469e-17	7.68704e-15
AP2B1	ENSG00000006125	protein_coding	8426.26	-0.077942	0.0628169	-1.24078	0.214687	0.371447
TAC1	ENSG00000006128	protein_coding	0.407818	-0.747153	0.472883	-1.58	0.114108	0.237417
ZNF263	ENSG00000006194	protein_coding	1018.99	-0.0715743	0.0402233	-1.77943	0.07517	0.17435
CX3CL1	ENSG00000006210	protein_coding	4.41995	0.393429	0.278339	1.41349	0.157513	0.298989
SPATA20	ENSG00000006282	protein_coding	1602.9	0.619584	0.148884	4.16152	3.1613e-05	0.000369344
CACNA1G	ENSG00000006283	protein_coding	5.73927	-0.071665	0.211088	-0.339503	0.734231	0.837935
TNFRSF12A	ENSG00000006327	protein_coding	52.0576	-0.248773	0.209434	-1.18783	0.2349	0.395408
DLX6	ENSG00000006377	protein_coding	1.29304	-0.277152	0.287284	-0.964731	0.33468	0.503744
MAP3K9	ENSG00000006432	protein_coding	105.02	-0.0448025	0.198221	-0.226023	0.821184	0.895155
RALA	ENSG00000006451	protein_coding	1356.52	-0.201208	0.0905645	-2.22171	0.0263027	0.0799677
BAIAP2L1	ENSG00000006453	protein_coding	152.355	0.513721	0.128003	4.01335	5.9862e-05	0.000633405
KDM7A	ENSG00000006459	protein_coding	1707.3	0.84975	0.161542	5.26024	1.4387e-07	3.67581e-06
ETV1	ENSG00000006468	protein_coding	7.19908	0.00569871	0.311247	0.0183093	0.985392	0.992426
AGK	ENSG00000006530	protein_coding	1317.46	-0.193639	0.0577425	-3.35349	0.000797989	0.00525934
ALDH3B1	ENSG00000006534	protein_coding	3092.32	0.749652	0.155116	4.83284	1.34599e-06	2.56039e-05
TTC22	ENSG00000006555	protein_coding	70.1735	0.460697	0.223835	2.0582	0.0395709	0.108646
PHTF2	ENSG00000006576	protein_coding	1546.75	0.221152	0.0822633	2.68835	0.00718065	0.0295355
CCL26	ENSG00000006606	protein_coding	1.00788	-0.380111	0.356801	-1.06533	0.286726	0.453818
FARP2	ENSG00000006607	protein_coding	1039.03	0.169457	0.101275	1.67323	0.0942813	0.20634
USH1C	ENSG00000006611	protein_coding	0.754962	-1.14352	0.355036	-3.22086	0.00127806	0.00762994
GGCT	ENSG00000006625	protein_coding	508.825	-0.230787	0.101595	-2.27164	0.0231081	0.0725297
DBF4	ENSG00000006634	protein_coding	680.454	-0.406309	0.0748898	-5.42542	5.78194e-08	1.6452e-06
TBXA2R	ENSG00000006638	protein_coding	263.45	0.127358	0.2622	0.485728	0.62716	0.759528
IFRD1	ENSG00000006652	protein_coding	1753.31	-0.00235667	0.0985827	-0.0239055	0.980928	0.98946
LGALS14	ENSG00000006659	protein_coding	1.44933	-1.05894	0.452578	-2.33979	0.0192945	0.0632299
COX10	ENSG00000006695	protein_coding	578.021	0.0116483	0.0600765	0.193891	0.846261	0.912079
GTF2IRD1	ENSG00000006704	protein_coding	115.878	-0.690353	0.242644	-2.84512	0.00443946	0.0203633
PAF1	ENSG00000006712	protein_coding	1246.84	0.0699046	0.0538493	1.29815	0.194235	0.346236
VPS41	ENSG00000006715	protein_coding	2369.57	0.0572395	0.0670453	0.853744	0.393247	0.56153
ARHGAP44	ENSG00000006740	protein_coding	75.509	0.128855	0.168525	0.764605	0.444507	0.609558
ELAC2	ENSG00000006744	protein_coding	2563.99	0.0947969	0.0642838	1.47466	0.140303	0.275416
SCIN	ENSG00000006747	protein_coding	9.97839	-0.235947	0.276913	-0.852062	0.39418	0.562535
ARSD	ENSG00000006756	protein_coding	2501.8	0.143385	0.134362	1.06715	0.285902	0.453032
PNPLA4	ENSG00000006757	protein_coding	239.721	-0.0574669	0.106454	-0.539831	0.589314	0.730549
MYH13	ENSG00000006788	protein_coding	1.85685	0.0675473	0.295024	0.228955	0.818904	0.893893
ADIPOR2	ENSG00000006831	protein_coding	2697.28	0.0921909	0.0562987	1.63753	0.101519	0.217771
CDKL3	ENSG00000006837	protein_coding	42.5746	-0.323278	0.0920444	-3.5122	0.000444417	0.00326355
UPP2	ENSG00000007001	protein_coding	22.3705	-0.656097	0.314319	-2.08736	0.0368554	0.102958
PRSS21	ENSG00000007038	protein_coding	816.872	-0.273781	0.459854	-0.595365	0.551599	0.700677
MARK4	ENSG00000007047	protein_coding	1437.45	0.130884	0.0708634	1.84698	0.0647493	0.156182
PROM1	ENSG00000007062	protein_coding	4430.83	-0.150457	0.379343	-0.396626	0.691644	0.807416
CCDC124	ENSG00000007080	protein_coding	585.025	0.288048	0.115487	2.4942	0.012624	0.0458053
CEACAM21	ENSG00000007129	protein_coding	260.235	0.184206	0.15515	1.18727	0.235119	0.395643
PAFAH1B1	ENSG00000007168	protein_coding	4985.42	-0.00156549	0.0463598	-0.0337683	0.973062	0.985239
NOS2	ENSG00000007171	protein_coding	4.64039	0.10575	0.341611	0.309561	0.756895	0.853293
DNAH9	ENSG00000007174	protein_coding	10.9583	-0.00812875	0.11175	-0.0727406	0.942013	0.96761
KIAA0100	ENSG00000007202	protein_coding	11700.8	0.0472014	0.0650158	0.725999	0.467839	0.630487
SLC13A2	ENSG00000007216	protein_coding	0.785296	-0.0157944	0.31042	-0.0508809	0.95942	0.977167
GAS7	ENSG00000007237	protein_coding	6226.97	0.880614	0.16625	5.29693	1.17768e-07	3.08908e-06
TRAPPC6A	ENSG00000007255	protein_coding	424.05	-0.000272918	0.110044	-0.00248007	0.998021	0.999522
MATK	ENSG00000007264	protein_coding	998.751	-0.433696	0.143659	-3.01892	0.00253678	0.0131432
CEACAM7	ENSG00000007306	protein_coding	0.425171	-0.146842	0.394931	-0.371817	0.710029	0.820176
CD79B	ENSG00000007312	protein_coding	683.086	0.627428	0.15256	4.11266	3.91133e-05	0.000443067
SCN4A	ENSG00000007314	protein_coding	63.1762	0.983135	0.235638	4.17223	3.01636e-05	0.000355125
ST7L	ENSG00000007341	protein_coding	755.142	-0.0939331	0.0533307	-1.76133	0.078182	0.179568
TKTL1	ENSG00000007350	protein_coding	31.1834	-0.106348	0.237357	-0.448053	0.654115	0.779725
PAX6	ENSG00000007372	protein_coding	131.77	-0.232816	0.0802074	-2.90267	0.00369993	0.0176199
RPUSD1	ENSG00000007376	protein_coding	829.812	0.355665	0.108775	3.26975	0.00107643	0.00666075
RHBDF1	ENSG00000007384	protein_coding	330.894	1.29648	0.26019	4.98283	6.26625e-07	1.33532e-05
LUC7L	ENSG00000007392	protein_coding	3067.97	-0.147726	0.0537468	-2.74855	0.00598594	0.0256847
CACNA2D2	ENSG00000007402	protein_coding	242.39	-1.11063	0.260205	-4.2683	1.96971e-05	0.000247535
BAIAP3	ENSG00000007516	protein_coding	261.548	-0.302242	0.265459	-1.13857	0.254885	0.418429
TSR3	ENSG00000007520	protein_coding	490.407	0.230444	0.096503	2.38795	0.0169428	0.0572465
PIGQ	ENSG00000007541	protein_coding	1695.01	-0.133626	0.124881	-1.07003	0.284606	0.451608
CRAMP1	ENSG00000007545	protein_coding	1683.31	-0.0479084	0.0683763	-0.700658	0.483517	0.644093
TEAD3	ENSG00000007866	protein_coding	42.959	0.0318323	0.2095	0.151944	0.879231	0.931145
SELE	ENSG00000007908	protein_coding	16.6914	-1.68379	0.364005	-4.62573	3.73275e-06	6.07316e-05
DNAJC11	ENSG00000007923	protein_coding	1306.58	-0.0259067	0.049139	-0.527212	0.598046	0.737492
FMO3	ENSG00000007933	protein_coding	32.667	-0.11088	0.353272	-0.313866	0.753623	0.851219
MYLIP	ENSG00000007944	protein_coding	1772.01	0.221166	0.107892	2.04989	0.0403755	0.110274
NOX1	ENSG00000007952	protein_coding	11.7221	-0.451252	0.127009	-3.55291	0.000380988	0.0028691
E2F2	ENSG00000007968	protein_coding	974.731	0.248256	0.148856	1.66776	0.0953637	0.208072
PSMB1	ENSG00000008018	protein_coding	2456.1	0.0861395	0.0597038	1.44278	0.149082	0.287858
SYN1	ENSG00000008056	protein_coding	54.9955	-0.0198261	0.229074	-0.0865488	0.93103	0.962084
JARID2	ENSG00000008083	protein_coding	6286.75	-0.304115	0.0583942	-5.20796	1.90926e-07	4.70445e-06
CDKL5	ENSG00000008086	protein_coding	307.398	0.324199	0.222621	1.45628	0.145314	0.28256
CAMK1G	ENSG00000008118	protein_coding	0.978415	0.0432329	0.406512	0.106351	0.915304	0.953148
CDK11A	ENSG00000008128	protein_coding	509.661	0.222732	0.109852	2.02756	0.0426053	0.114758
NADK	ENSG00000008130	protein_coding	3352.31	1.09578	0.102987	10.64	1.94093e-26	1.82956e-23
TFAP2B	ENSG00000008196	protein_coding	0.52985	0.391016	0.430543	0.908192	0.363777	0.533708
TFAP2D	ENSG00000008197	protein_coding	0.202369	-0.070918	0.712924	-0.0994749	0.920761
DLEC1	ENSG00000008226	protein_coding	191.902	0.412613	0.112093	3.681	0.00023232	0.00192311
CYTH3	ENSG00000008256	protein_coding	623.093	-0.154326	0.106349	-1.45113	0.146744	0.284466
ADAM22	ENSG00000008277	protein_coding	340.818	-1.08666	0.181219	-5.99637	2.01781e-09	8.30038e-08
SYPL1	ENSG00000008282	protein_coding	3406.58	-0.273329	0.0862267	-3.16989	0.00152497	0.00876162
CYB561	ENSG00000008283	protein_coding	710.973	0.435237	0.128498	3.38712	0.000706294	0.00476342
SPAG9	ENSG00000008294	protein_coding	3432.08	0.0686874	0.0611995	1.12235	0.261713	0.425899
CELSR3	ENSG00000008300	protein_coding	469.169	-0.398508	0.208072	-1.91524	0.0554624	0.139452
AASS	ENSG00000008311	protein_coding	110.802	-0.767199	0.353032	-2.17317	0.0297677	0.0877374
PLEKHG6	ENSG00000008323	protein_coding	242.38	-0.290531	0.143423	-2.02569	0.0427966	0.115127
SS18L2	ENSG00000008324	protein_coding	431.143	0.0168084	0.078218	0.214892	0.829852	0.901255
MPND	ENSG00000008382	protein_coding	461.446	-0.116887	0.118218	-0.988738	0.322792	0.491849
MGST1	ENSG00000008394	protein_coding	5301.91	-0.665174	0.205018	-3.24446	0.00117673	0.00715026
CRY1	ENSG00000008405	protein_coding	512.42	-0.215277	0.122999	-1.75024	0.0800775	0.182936
PGLYRP1	ENSG00000008438	protein_coding	82.1883	0.362635	0.265856	1.36402	0.17256	0.318538
NFIX	ENSG00000008441	protein_coding	2614.02	0.0279322	0.169791	0.164509	0.86933	0.925371
ST3GAL1	ENSG00000008513	protein_coding	4888.54	0.0367577	0.0817936	0.449396	0.653146	0.778905
MMP25	ENSG00000008516	protein_coding	491.376	0.833325	0.212142	3.92816	8.55999e-05	0.000846503
IL32	ENSG00000008517	protein_coding	290.298	0.34094	0.194977	1.74862	0.080357	0.183357
PKD1	ENSG00000008710	protein_coding	5257.49	0.0483594	0.109277	0.442539	0.658099	0.782831
MAPK8IP2	ENSG00000008735	protein_coding	20.3856	-0.0784397	0.13658	-0.574315	0.565754	0.712063
MED24	ENSG00000008838	protein_coding	3208.06	0.0656456	0.0682175	0.962298	0.3359	0.504932
RHOBTB2	ENSG00000008853	protein_coding	731.529	0.565659	0.109127	5.18349	2.1777e-07	5.2894e-06
HEATR5B	ENSG00000008869	protein_coding	5370.61	-0.0368866	0.0767376	-0.480685	0.63074	0.762188
SEC62	ENSG00000008952	protein_coding	5379.49	-0.204667	0.0816	-2.50818	0.0121356	0.0444333
RPS20	ENSG00000008988	protein_coding	20631.1	-0.101017	0.105071	-0.961419	0.336342	0.505511
CSDE1	ENSG00000009307	protein_coding	17567.3	-0.0985382	0.0579098	-1.70158	0.088834	0.197363
UBE3C	ENSG00000009335	protein_coding	3319.07	0.0405635	0.0551067	0.73609	0.461676	0.625015
REV3L	ENSG00000009413	protein_coding	3570.22	-0.372446	0.0761466	-4.89117	1.00239e-06	1.98786e-05
TENM1	ENSG00000009694	protein_coding	342.221	-0.208068	0.212674	-0.978342	0.327905	0.496851
PAX7	ENSG00000009709	protein_coding	0.805097	-0.221	0.35035	-0.630797	0.528174	0.681043
MASP2	ENSG00000009724	protein_coding	503.23	0.0110449	0.0815945	0.135363	0.892325	0.938884
IYD	ENSG00000009765	protein_coding	1.60485	-0.389506	0.226398	-1.72045	0.0853507	0.191594
FAM76A	ENSG00000009780	protein_coding	430.906	0.0299953	0.0577707	0.519213	0.603612	0.741675
TRAF3IP3	ENSG00000009790	protein_coding	3613.56	0.504869	0.0886926	5.69235	1.25301e-08	4.26361e-07
POMT2	ENSG00000009830	protein_coding	852.625	-0.397437	0.0912909	-4.35352	1.33968e-05	0.000177826
VTA1	ENSG00000009844	protein_coding	1691.5	-0.125433	0.0673259	-1.86307	0.0624521	0.152173
MLXIPL	ENSG00000009950	protein_coding	19.4534	0.694308	0.250559	2.77103	0.00558792	0.0243397
BAZ1B	ENSG00000009954	protein_coding	4437.7	-0.0978398	0.0614907	-1.59113	0.11158	0.233473
RANBP9	ENSG00000010017	protein_coding	2743.93	-0.23424	0.048752	-4.80473	1.54959e-06	2.88937e-05
ETV7	ENSG00000010030	protein_coding	19.6379	1.16961	0.288969	4.04753	5.17617e-05	0.000560137
SPRTN	ENSG00000010072	protein_coding	478.39	-0.0179163	0.0598054	-0.299577	0.7645	0.858502
EEF1AKNMT	ENSG00000010165	protein_coding	1243.74	-0.0756674	0.0736335	-1.02762	0.304128	0.472433
DYRK4	ENSG00000010219	protein_coding	362.511	0.0285862	0.0752077	0.380097	0.703874	0.816392
ZNF207	ENSG00000010244	protein_coding	14354.9	-0.0325367	0.0426189	-0.763434	0.445205	0.610156
UQCRC1	ENSG00000010256	protein_coding	2862.85	0.461139	0.0985193	4.68069	2.85906e-06	4.83269e-05
STARD3NL	ENSG00000010270	protein_coding	1551.77	-0.152517	0.067891	-2.2465	0.0246721	0.0761654
CD9	ENSG00000010278	protein_coding	963.916	0.143199	0.261135	0.548372	0.583436	0.726194
HHATL	ENSG00000010282	protein_coding	0.852022	0.915344	0.367558	2.49034	0.0127621	0.0461754
NCAPD2	ENSG00000010292	protein_coding	4691.06	-0.015104	0.0892351	-0.169261	0.865591	0.923429
IFFO1	ENSG00000010295	protein_coding	1883.27	0.607824	0.0950175	6.39697	1.58492e-10	8.41926e-09
GIPR	ENSG00000010310	protein_coding	76.5731	0.735328	0.253107	2.90521	0.00367009	0.0175192
PHF7	ENSG00000010318	protein_coding	605.952	-0.291749	0.0764039	-3.81851	0.000134259	0.00122087
SEMA3G	ENSG00000010319	protein_coding	57.8047	-1.03866	0.244989	-4.23963	2.23888e-05	0.000275755
NISCH	ENSG00000010322	protein_coding	6152.06	0.187503	0.0975013	1.92309	0.0544691	0.137674
STAB1	ENSG00000010327	protein_coding	30042.3	-0.518351	0.322938	-1.60511	0.10847	0.22877
FUZ	ENSG00000010361	protein_coding	535.361	-0.184976	0.0808266	-2.28856	0.0221051	0.0702023
SLC6A13	ENSG00000010379	protein_coding	8.69489	0.572631	0.204515	2.79994	0.00511122	0.0227443
IDS	ENSG00000010404	protein_coding	5105.8	0.151336	0.0942788	1.6052	0.10845	0.22875
PRSS3	ENSG00000010438	protein_coding	12.5546	-1.14737	0.233626	-4.91113	9.05544e-07	1.82808e-05
ZNF200	ENSG00000010539	protein_coding	353.081	-0.158104	0.0838814	-1.88485	0.0594496	0.146757
CD4	ENSG00000010610	protein_coding	4640.66	1.41061	0.217215	6.49406	8.35522e-11	4.63281e-09
LRRC23	ENSG00000010626	protein_coding	283.78	-0.0784302	0.0857722	-0.914402	0.360506	0.530192
BTK	ENSG00000010671	protein_coding	4849.16	0.0958386	0.0744793	1.28678	0.19817	0.351214
HFE	ENSG00000010704	protein_coding	78.5959	1.53657	0.212238	7.23985	4.49181e-13	3.79049e-11
SCMH1	ENSG00000010803	protein_coding	2812.99	-0.295112	0.0923129	-3.19687	0.00138927	0.00813343
FYN	ENSG00000010810	protein_coding	2100.44	0.580976	0.137914	4.21259	2.52461e-05	0.000304597
HIVEP2	ENSG00000010818	protein_coding	1648.62	-0.360283	0.15161	-2.37638	0.0174836	0.0586799
FMO1	ENSG00000010932	protein_coding	4.91291	-0.534163	0.194692	-2.74364	0.00607625	0.0259837
ELOA	ENSG00000011007	protein_coding	1574.04	-0.0960941	0.0421546	-2.27956	0.0226335	0.0714655
LYPLA2	ENSG00000011009	protein_coding	1166.93	0.37106	0.0924133	4.01522	5.939e-05	0.000629162
CLCN6	ENSG00000011021	protein_coding	1902.25	0.319207	0.0653367	4.88556	1.03134e-06	2.03247e-05
MRC2	ENSG00000011028	protein_coding	1666.08	-1.40645	0.254161	-5.53371	3.13528e-08	9.57288e-07
NME1-NME2	ENSG00000011052	protein_coding	15.5464	0.0854823	0.177887	0.480542	0.630842	0.762197
SLC6A7	ENSG00000011083	protein_coding	1.10768	0.530823	0.28789	1.84384	0.0652064	0.156963
TSPAN9	ENSG00000011105	protein_coding	79.3113	-0.358779	0.296278	-1.21095	0.225914	0.384461
BTBD7	ENSG00000011114	protein_coding	2335.4	-0.0402196	0.0428908	-0.937722	0.348387	0.517835
APBA3	ENSG00000011132	protein_coding	566.015	0.205471	0.0979529	2.09765	0.0359358	0.101032
MKS1	ENSG00000011143	protein_coding	531.277	-0.203982	0.0782247	-2.60764	0.00911701	0.035506
ABHD5	ENSG00000011198	protein_coding	650.746	0.296605	0.122156	2.42808	0.015179	0.0526496
ANOS1	ENSG00000011201	protein_coding	4.11641	0.0312745	0.364914	0.0857037	0.931702	0.962419
AKAP8L	ENSG00000011243	protein_coding	2330.33	0.137267	0.0793567	1.72975	0.0836743	0.188931
MBTD1	ENSG00000011258	protein_coding	3013.22	-0.362018	0.0664728	-5.44611	5.14835e-08	1.48012e-06
UTP18	ENSG00000011260	protein_coding	1309.51	-0.233873	0.0534444	-4.37601	1.20871e-05	0.00016326
RNF216	ENSG00000011275	protein_coding	3077.42	0.00946507	0.0520888	0.18171	0.85581	0.917704
TTC19	ENSG00000011295	protein_coding	2838.9	-0.123893	0.0470211	-2.63484	0.00841776	0.0333869
PTBP1	ENSG00000011304	protein_coding	10346.7	-0.0149244	0.0688462	-0.216778	0.828381	0.900365
DPF1	ENSG00000011332	protein_coding	97.8718	-0.29559	0.155529	-1.90055	0.0573608	0.14296
SYT7	ENSG00000011347	protein_coding	3.46922	0.216149	0.20779	1.04023	0.298234	0.466252
LARS2	ENSG00000011376	protein_coding	1016.47	-0.0434646	0.0595341	-0.730078	0.465342	0.628468
PIK3C2A	ENSG00000011405	protein_coding	2639.93	0.0788436	0.057597	1.36888	0.171036	0.316476
PLAUR	ENSG00000011422	protein_coding	1880.42	0.735418	0.195984	3.75244	0.000175123	0.00152576
ANLN	ENSG00000011426	protein_coding	1424.34	-0.110049	0.157597	-0.698295	0.484993	0.645303
WIZ	ENSG00000011451	protein_coding	2219.3	-0.0428741	0.0811075	-0.528609	0.597077	0.736833
RABGAP1	ENSG00000011454	protein_coding	2048.92	0.110293	0.0826554	1.33437	0.182082	0.330983
DCN	ENSG00000011465	protein_coding	114.908	-0.461329	0.367253	-1.25616	0.209058	0.364498
QPCTL	ENSG00000011478	protein_coding	480.64	-0.286084	0.100044	-2.85958	0.00424208	0.0196607
PPP5C	ENSG00000011485	protein_coding	1953.12	0.0561518	0.0685971	0.818574	0.41303	0.580572
CEP68	ENSG00000011523	protein_coding	2202	-0.0334206	0.0714261	-0.467904	0.639853	0.768931
MAP4K3	ENSG00000011566	protein_coding	974.936	-0.193901	0.0908956	-2.13323	0.0329059	0.0946382
ZBTB32	ENSG00000011590	protein_coding	96.0706	-0.131471	0.135334	-0.971455	0.331322	0.500411
TYROBP	ENSG00000011600	protein_coding	5098.09	1.14037	0.194422	5.86543	4.47959e-09	1.69667e-07
TMEM159	ENSG00000011638	protein_coding	450.894	-0.0558124	0.0788066	-0.70822	0.478808	0.639976
GABRA3	ENSG00000011677	protein_coding	0.991929	-1.55933	0.479646	-3.251	0.00115001	0.00701773
BRCA1	ENSG00000012048	protein_coding	2292.62	-0.244321	0.108727	-2.24711	0.0246328	0.0760757
ERCC1	ENSG00000012061	protein_coding	1904.71	0.207481	0.0839975	2.47008	0.0135082	0.0481962
CD22	ENSG00000012124	protein_coding	593.607	0.145567	0.214875	0.67745	0.498121	0.656734
SEMA3B	ENSG00000012171	protein_coding	59.9818	-0.162834	0.168716	-0.965138	0.334476	0.503535
MBTPS2	ENSG00000012174	protein_coding	733.638	-0.128232	0.0631648	-2.03011	0.0423449	0.114245
PRICKLE3	ENSG00000012211	protein_coding	465.474	0.46716	0.0851711	5.48497	4.13551e-08	1.2181e-06
LTF	ENSG00000012223	protein_coding	629.095	0.251725	0.4091	0.615313	0.538348	0.689897
EXTL3	ENSG00000012232	protein_coding	1241.65	0.354888	0.084316	4.20902	2.56479e-05	0.000308856
NR1H4	ENSG00000012504	protein_coding	0.232169	-0.416152	0.645976	-0.644222	0.519432
ELOVL5	ENSG00000012660	protein_coding	3202.56	0.0428703	0.106635	0.402028	0.687663	0.804468
ALOX5	ENSG00000012779	protein_coding	3310.63	0.663545	0.252316	2.62982	0.00854292	0.0337775
KDM5D	ENSG00000012817	protein_coding	3811.63	0.257538	0.548477	0.469551	0.638676	0.76812
CALCOCO1	ENSG00000012822	protein_coding	3508.42	0.18043	0.0790515	2.28244	0.0224636	0.0710455
UBR7	ENSG00000012963	protein_coding	1619.18	-0.177755	0.0567376	-3.13293	0.00173071	0.00969899
MAP4K5	ENSG00000012983	protein_coding	2373.45	-0.200006	0.07293	-2.74244	0.00609841	0.0260613
EHD3	ENSG00000013016	protein_coding	685.797	-0.150712	0.195738	-0.76997	0.441318	0.606666
PSMC4	ENSG00000013275	protein_coding	1392.36	0.204482	0.0844203	2.42219	0.0154273	0.0533007
MAN2B2	ENSG00000013288	protein_coding	3089.68	0.3237	0.0778481	4.1581	3.20909e-05	0.000373842
SLC7A14	ENSG00000013293	protein_coding	1.41271	-0.0993518	0.238148	-0.417184	0.676544	0.796707
CLDN11	ENSG00000013297	protein_coding	4.81184	0.392197	0.187971	2.08648	0.036935	0.103153
SLC25A39	ENSG00000013306	protein_coding	2809.18	-0.0354318	0.137613	-0.257473	0.796813	0.87965
MVP	ENSG00000013364	protein_coding	2801.49	1.25827	0.124019	10.1458	3.45839e-24	1.93946e-21
NUB1	ENSG00000013374	protein_coding	2211.55	0.120562	0.0706769	1.70582	0.0880407	0.196053
PGM3	ENSG00000013375	protein_coding	709.937	0.0686974	0.0885932	0.775425	0.438088	0.60419
RWDD2A	ENSG00000013392	protein_coding	73.293	0.27961	0.147912	1.89039	0.0587065	0.145479
CLK1	ENSG00000013441	protein_coding	6733.75	-0.0498912	0.0728955	-0.68442	0.49371	0.652881
POLR3B	ENSG00000013503	protein_coding	415.106	-0.179242	0.0674672	-2.65673	0.00789019	0.031781
ANGEL1	ENSG00000013523	protein_coding	1559.05	0.0650227	0.0742809	0.875361	0.381377	0.550149
RNF14	ENSG00000013561	protein_coding	805.882	0.024641	0.0718831	0.342792	0.731755	0.836229
DNASE1L1	ENSG00000013563	protein_coding	793.659	0.707471	0.0937519	7.5462	4.48133e-14	4.68246e-12
DDX11	ENSG00000013573	protein_coding	1794.73	0.0886783	0.101796	0.871138	0.383679	0.552425
HEBP1	ENSG00000013583	protein_coding	850.567	0.00658351	0.0906399	0.0726337	0.942098	0.967646
GPRC5A	ENSG00000013588	protein_coding	4.62306	-0.245521	0.170574	-1.43938	0.150044	0.28898
MAMLD1	ENSG00000013619	protein_coding	87.9298	-0.644101	0.245217	-2.62666	0.00862275	0.0340203
CD6	ENSG00000013725	protein_coding	620.983	0.177941	0.201628	0.88252	0.377496	0.546399
TACC3	ENSG00000013810	protein_coding	5042.51	0.152866	0.0715579	2.13625	0.0326589	0.0941003
UFL1	ENSG00000014123	protein_coding	1550.98	-0.0397796	0.0623025	-0.638491	0.523154	0.676927
POLA2	ENSG00000014138	protein_coding	1762.44	0.0832647	0.0723371	1.15107	0.249705	0.412676
ZC3H3	ENSG00000014164	protein_coding	1988.26	0.0572534	0.112161	0.510457	0.609731	0.746327
CAPN1	ENSG00000014216	protein_coding	6540.72	0.338581	0.0848283	3.99136	6.56947e-05	0.000683691
ACP3	ENSG00000014257	protein_coding	623.678	1.35069	0.200905	6.72304	1.77967e-11	1.11893e-09
MDH1	ENSG00000014641	protein_coding	2463.3	0.0135785	0.0704816	0.192653	0.847231	0.912547
SLC30A9	ENSG00000014824	protein_coding	1906.45	-0.103836	0.0543194	-1.91159	0.0559289	0.140315
MTMR11	ENSG00000014914	protein_coding	434.899	2.50627	0.308159	8.13303	4.18688e-16	6.46312e-14
COX15	ENSG00000014919	protein_coding	1760.36	0.102104	0.0541769	1.88465	0.0594772	0.146797
CCDC88C	ENSG00000015133	protein_coding	5571.03	0.452196	0.0690613	6.54775	5.84102e-11	3.31337e-09
YAF2	ENSG00000015153	protein_coding	1123.09	-0.146839	0.0672373	-2.18389	0.0289706	0.0860013
ZMYND11	ENSG00000015171	protein_coding	2227.36	-0.322625	0.0738666	-4.36767	1.2558e-05	0.000168747
WAS	ENSG00000015285	protein_coding	4270.58	0.711619	0.102334	6.95388	3.55383e-12	2.57047e-10
DPEP1	ENSG00000015413	protein_coding	57.5702	0.5448	0.320562	1.69952	0.0892221	0.198066
BID	ENSG00000015475	protein_coding	1711.47	0.34983	0.0773198	4.52446	6.05501e-06	9.17111e-05
MATR3	ENSG00000015479	protein_coding	1257.11	-0.408573	0.101175	-4.03827	5.38472e-05	0.000580012
NPC1L1	ENSG00000015520	protein_coding	13.7597	0.00831043	0.175286	0.0474106	0.962186	0.97871
XYLT2	ENSG00000015532	protein_coding	1251.18	-0.0937403	0.0686408	-1.36567	0.172044	0.317869
RGPD5	ENSG00000015568	protein_coding	2.98472	-0.411072	0.174476	-2.35604	0.0184711	0.0611876
STMN4	ENSG00000015592	protein_coding	1.6611	-0.615764	0.308467	-1.99621	0.0459111	0.121155
NUDCD3	ENSG00000015676	protein_coding	2431.11	-0.0631429	0.0577837	-1.09275	0.274505	0.440332
ISL1	ENSG00000016082	protein_coding	0.413891	-0.382053	0.402581	-0.949008	0.342616	0.512041
CHDH	ENSG00000016391	protein_coding	13.9949	0.419383	0.22846	1.8357	0.0664026	0.159001
IL20RA	ENSG00000016402	protein_coding	0.450561	-0.410401	0.37867	-1.0838	0.278456	0.444588
CLCA1	ENSG00000016490	protein_coding	0.704933	-0.312765	0.54977	-0.568901	0.569424	0.715048
CLCA4	ENSG00000016602	protein_coding	2.60001	-0.174567	0.259219	-0.673434	0.500671	0.658654
GLT8D1	ENSG00000016864	protein_coding	1389.05	-0.230112	0.0806622	-2.85279	0.00433378	0.0199875
ATP2C1	ENSG00000017260	protein_coding	4906.2	-0.438675	0.0714566	-6.13905	8.30166e-10	3.78383e-08
IGF1	ENSG00000017427	protein_coding	6.42353	0.374128	0.306453	1.22083	0.222149	0.380259
SLC38A5	ENSG00000017483	protein_coding	1019	-0.181313	0.126188	-1.43685	0.150761	0.289977
RALBP1	ENSG00000017797	protein_coding	3218.98	-0.178038	0.0615897	-2.89071	0.00384375	0.0181767
RUFY3	ENSG00000018189	protein_coding	1636.67	0.0862115	0.122342	0.704674	0.481013	0.641781
CNTN1	ENSG00000018236	protein_coding	37.4718	-0.0685474	0.398769	-0.171897	0.863518	0.922256
SLC11A1	ENSG00000018280	protein_coding	2978.57	2.80421	0.259239	10.8171	2.85752e-27	3.08772e-24
WWTR1	ENSG00000018408	protein_coding	62.797	-0.158157	0.221098	-0.715323	0.47441	0.636087
AGPS	ENSG00000018510	protein_coding	2986.42	-0.177227	0.0813728	-2.17797	0.0294083	0.0869627
ZNF806	ENSG00000018607	transcribed_unprocessed_pseudogene	0.299375	-0.380733	0.553109	-0.68835	0.491232
CXorf56	ENSG00000018610	protein_coding	479.791	-0.0111328	0.0535047	-0.208071	0.835174	0.905105
ATP1A2	ENSG00000018625	protein_coding	3.65968	0.20082	0.239547	0.838333	0.401843	0.569892
TTC27	ENSG00000018699	protein_coding	1016.55	-0.129915	0.115523	-1.12458	0.260766	0.424833
ZNF582	ENSG00000018869	protein_coding	152.987	-0.303379	0.0779144	-3.89375	9.87057e-05	0.000952714
VSIG2	ENSG00000019102	protein_coding	165.615	1.41286	0.228414	6.18552	6.18996e-10	2.91428e-08
PHLDB1	ENSG00000019144	protein_coding	211.716	-0.720658	0.244748	-2.94449	0.00323486	0.0159238
MARCO	ENSG00000019169	protein_coding	228.204	3.4062	0.372312	9.14879	5.75772e-20	1.55539e-17
CYP24A1	ENSG00000019186	protein_coding	1.05382	0.0190721	0.299166	0.0637509	0.949169	0.971209
PRDM11	ENSG00000019485	protein_coding	1148.6	-0.321252	0.110279	-2.91308	0.00357884	0.0171874
SYT13	ENSG00000019505	protein_coding	1.31703	-0.247079	0.263764	-0.936745	0.34889	0.518356
SNAI2	ENSG00000019549	protein_coding	20.4383	-0.128161	0.393084	-0.326039	0.744395	0.844922
CD74	ENSG00000019582	protein_coding	73604.3	0.87018	0.194007	4.48531	7.28093e-06	0.00010674
HGF	ENSG00000019991	protein_coding	6889.84	-2.11987	0.291367	-7.27561	3.4487e-13	3.00763e-11
ZRANB1	ENSG00000019995	protein_coding	874.691	-0.182748	0.0565624	-3.23091	0.00123397	0.00742276
NCDN	ENSG00000020129	protein_coding	1149.07	0.0660278	0.0905266	0.729375	0.465772	0.628889
ADGRA2	ENSG00000020181	protein_coding	1660.22	0.868438	0.248569	3.49375	0.000476279	0.00345459
CCT8L1P	ENSG00000020219	processed_pseudogene	7.01861	-0.135313	0.143793	-0.941026	0.346691	0.516198
ZFP64	ENSG00000020256	protein_coding	639.138	-0.0868071	0.0539591	-1.60876	0.107669	0.227543
MNAT1	ENSG00000020426	protein_coding	343.234	-0.401692	0.0724766	-5.54237	2.98413e-08	9.16187e-07
SAMD4A	ENSG00000020577	protein_coding	127.465	2.10904	0.220589	9.56097	1.1666e-21	4.0065e-19
RUNX3	ENSG00000020633	protein_coding	2784.33	-0.0879369	0.179448	-0.490041	0.624105	0.757315
MRE11	ENSG00000020922	protein_coding	2625.71	-0.126229	0.0651995	-1.93604	0.0528628	0.134612
PLEKHB1	ENSG00000021300	protein_coding	163.137	-0.0413265	0.123005	-0.335975	0.73689	0.839564
SERPINB1	ENSG00000021355	protein_coding	16351.3	-0.06668	0.104646	-0.637194	0.523998	0.677683
CYP3A43	ENSG00000021461	protein_coding	4.75268	-0.605489	0.202025	-2.9971	0.00272563	0.0139246
SLC7A9	ENSG00000021488	protein_coding	14.4143	-0.15321	0.146841	-1.04337	0.296775	0.464627
SPAST	ENSG00000021574	protein_coding	1507.71	-0.109633	0.0629433	-1.74178	0.0815472	0.185338
NRXN3	ENSG00000021645	protein_coding	43.2366	-1.20304	0.335809	-3.58252	0.000340293	0.00261584
OSBPL5	ENSG00000021762	protein_coding	3704.74	-0.234291	0.14453	-1.62106	0.105005	0.223292
AQR	ENSG00000021776	protein_coding	3099.28	-0.0166076	0.0500927	-0.331537	0.740239	0.84215
CPS1	ENSG00000021826	protein_coding	20.1592	0.253546	0.327036	0.775285	0.438171	0.604255
C8B	ENSG00000021852	protein_coding	0.579408	0.221666	0.748703	0.296067	0.767179	0.860072
FHL1	ENSG00000022267	protein_coding	1082.55	0.683015	0.216976	3.14789	0.00164456	0.00931817
RTF2	ENSG00000022277	protein_coding	2168.44	0.193942	0.0568931	3.40889	0.000652287	0.00446374
GABRA1	ENSG00000022355	protein_coding	0.500038	-1.32988	0.507559	-2.62016	0.00878892	0.0345712
NLRP2	ENSG00000022556	protein_coding	454.152	-0.450952	0.328595	-1.37237	0.169949	0.315111
SLC45A4	ENSG00000022567	protein_coding	620.424	0.452576	0.136922	3.30536	0.00094853	0.00602649
RNF10	ENSG00000022840	protein_coding	5823.36	0.0795905	0.0805083	0.9886	0.322859	0.491867
ZNF839	ENSG00000022976	protein_coding	537.253	-0.09195	0.0546201	-1.68345	0.0922888	0.203234
ZDHHC6	ENSG00000023041	protein_coding	1832.01	0.0808709	0.0408024	1.98201	0.047478	0.124257
GRAMD1B	ENSG00000023171	protein_coding	1110.97	0.121062	0.222061	0.545177	0.585632	0.72779
RNH1	ENSG00000023191	protein_coding	4124.04	0.40597	0.124615	3.25781	0.00112277	0.00689045
NDUFS1	ENSG00000023228	protein_coding	3313.27	-0.0945974	0.0528652	-1.78941	0.0735492	0.17157
RB1CC1	ENSG00000023287	protein_coding	3089.26	-0.224396	0.0768792	-2.91881	0.00351366	0.0169478
ERP44	ENSG00000023318	protein_coding	2764.63	0.229683	0.0694422	3.30753	0.000941214	0.0059929
ALAS1	ENSG00000023330	protein_coding	1524.34	0.12195	0.102007	1.1955	0.231892	0.39182
BIRC3	ENSG00000023445	protein_coding	1083.22	0.368059	0.145221	2.53447	0.0112618	0.0419692
AKAP11	ENSG00000023516	protein_coding	3688.56	-0.0910722	0.0846994	-1.07524	0.282267	0.44899
GLRX2	ENSG00000023572	protein_coding	148.78	-0.0947547	0.0687684	-1.37788	0.16824	0.312937
SNAPC1	ENSG00000023608	protein_coding	278.235	-0.376569	0.0770311	-4.88853	1.01593e-06	2.00753e-05
DERA	ENSG00000023697	protein_coding	906.297	0.0196533	0.0773888	0.253955	0.79953	0.881471
STRAP	ENSG00000023734	protein_coding	2366.35	-0.109525	0.064662	-1.69381	0.0903009	0.199778
ABCC2	ENSG00000023839	protein_coding	154.939	0.0900464	0.0999389	0.901014	0.367581	0.537229
DEF6	ENSG00000023892	protein_coding	3042.38	0.407314	0.0763215	5.33682	9.45883e-08	2.5459e-06
PLEKHO1	ENSG00000023902	protein_coding	2894.64	0.501467	0.118758	4.22258	2.41524e-05	0.000294125
GCLM	ENSG00000023909	protein_coding	643.924	-0.312309	0.145096	-2.15243	0.0313637	0.0912499
UBR2	ENSG00000024048	protein_coding	4812.19	0.10065	0.0508634	1.97883	0.0478351	0.12494
EHD2	ENSG00000024422	protein_coding	774.965	0.49901	0.32223	1.54861	0.121475	0.248554
DEPDC1	ENSG00000024526	protein_coding	448.923	-0.482005	0.168558	-2.85958	0.00424198	0.0196607
CCDC28A	ENSG00000024862	protein_coding	629.813	0.026658	0.0642788	0.414724	0.678344	0.798021
RRAGD	ENSG00000025039	protein_coding	1141.1	-0.409711	0.135147	-3.03161	0.00243256	0.0127012
HSF2	ENSG00000025156	protein_coding	628.458	-0.373081	0.0917749	-4.06518	4.79961e-05	0.000527112
PHF20	ENSG00000025293	protein_coding	2746.05	-0.0772472	0.0567782	-1.36051	0.173669	0.319986
HSD17B6	ENSG00000025423	protein_coding	16.3907	-0.846689	0.131208	-6.45301	1.0965e-10	5.98255e-09
NR1H3	ENSG00000025434	protein_coding	937.232	0.196115	0.147979	1.32529	0.185075	0.334689
TYMP	ENSG00000025708	protein_coding	2683.46	2.26227	0.207236	10.9164	9.62559e-28	1.12222e-24
NCAPH2	ENSG00000025770	protein_coding	1186.84	0.0142667	0.0896176	0.159196	0.873515	0.927774
TOMM34	ENSG00000025772	protein_coding	915.142	-0.0103074	0.0761247	-0.135401	0.892295	0.938875
SEC63	ENSG00000025796	protein_coding	3572.16	-0.168058	0.0549549	-3.05811	0.0022274	0.0118492
KPNA6	ENSG00000025800	protein_coding	4080.12	-0.0648852	0.0381794	-1.69948	0.0892289	0.198071
VIM	ENSG00000026025	protein_coding	52372.2	0.514403	0.165046	3.11674	0.00182865	0.0101319
RTEL1-TNFRSF6B	ENSG00000026036	protein_coding	450.725	0.0970969	0.0937838	1.03533	0.300516	0.46855
FAS	ENSG00000026103	protein_coding	950.819	0.139464	0.107316	1.29956	0.19375	0.34563
RNASET2	ENSG00000026297	protein_coding	3962.66	0.208516	0.110556	1.88607	0.0592858	0.146505
CD44	ENSG00000026508	protein_coding	26986.7	-0.226319	0.128624	-1.75954	0.078485	0.179994
KCNG1	ENSG00000026559	protein_coding	13.017	-0.150125	0.227447	-0.660047	0.509224	0.665943
AGPAT4	ENSG00000026652	protein_coding	1075.1	-0.0692434	0.159579	-0.433913	0.664351	0.787878
SLAMF7	ENSG00000026751	protein_coding	644.481	0.728999	0.210076	3.47017	0.000520132	0.00371069
BTN3A1	ENSG00000026950	protein_coding	2321.78	0.272696	0.0947762	2.87726	0.00401142	0.0188161
MIPEP	ENSG00000027001	protein_coding	285.236	-0.204788	0.0787976	-2.59891	0.00935191	0.0362705
PRKCH	ENSG00000027075	protein_coding	1534	0.32461	0.178633	1.81719	0.0691882	0.163873
INSRR	ENSG00000027644	protein_coding	11.266	0.416793	0.231742	1.79852	0.0720947	0.168986
IFNGR1	ENSG00000027697	protein_coding	3272.45	1.04653	0.12888	8.12017	4.65545e-16	7.16148e-14
B4GALT7	ENSG00000027847	protein_coding	1156.87	0.0858741	0.0724793	1.18481	0.236093	0.396935
SH2D2A	ENSG00000027869	protein_coding	177.079	0.390262	0.186704	2.09027	0.0365936	0.102381
VRK2	ENSG00000028116	protein_coding	916.321	-0.0313781	0.0646177	-0.485596	0.627253	0.759579
TNFRSF1B	ENSG00000028137	protein_coding	5236.62	2.3815	0.183702	12.964	1.95817e-38	1.73506e-34
VEZT	ENSG00000028203	protein_coding	1854.76	-0.195202	0.0609024	-3.20515	0.00134991	0.00795236
POU2F2	ENSG00000028277	protein_coding	5421.6	1.5202	0.177708	8.55444	1.18441e-17	2.39129e-15
BRD9	ENSG00000028310	protein_coding	1751.78	0.0864541	0.0524196	1.64927	0.0990922	0.214025
SNX1	ENSG00000028528	protein_coding	4659.28	0.163261	0.0423668	3.85352	0.000116432	0.00108618
TBPL1	ENSG00000028839	protein_coding	532.58	-0.266917	0.0815015	-3.27499	0.00105664	0.00656768
ARNTL2	ENSG00000029153	protein_coding	501.449	-0.248573	0.174919	-1.42108	0.155294	0.295927
BCLAF1	ENSG00000029363	protein_coding	8393.71	-0.140454	0.0628532	-2.23463	0.0254414	0.0780345
SLC39A9	ENSG00000029364	protein_coding	3129.34	-0.000849553	0.0474481	-0.0179049	0.985715	0.992617
ANK1	ENSG00000029534	protein_coding	2270.13	-1.14253	0.319721	-3.57352	0.00035221	0.0026908
IBSP	ENSG00000029559	protein_coding	1.70991	0.0656329	0.566759	0.115804	0.907808	0.948709
TFB1M	ENSG00000029639	protein_coding	403.504	-0.0595346	0.0599505	-0.993062	0.32068	0.489862
RABEP1	ENSG00000029725	protein_coding	3145.75	-0.19952	0.0519734	-3.83888	0.000123595	0.00114313
HMGB3	ENSG00000029993	protein_coding	745.748	-0.487742	0.14548	-3.35263	0.000800476	0.00527244
NUP160	ENSG00000030066	protein_coding	3944.81	-0.131232	0.0576273	-2.27725	0.0227713	0.071788
BAK1	ENSG00000030110	protein_coding	939.182	0.460559	0.0933526	4.93354	8.07528e-07	1.65596e-05
MUSK	ENSG00000030304	protein_coding	8.1379	1.02409	0.32088	3.19151	0.00141532	0.00825579
IKZF2	ENSG00000030419	protein_coding	1645.52	-0.808408	0.285439	-2.83216	0.00462353	0.0210347
GRN	ENSG00000030582	protein_coding	18306.1	1.19495	0.192232	6.21616	5.09461e-10	2.43744e-08
FAM13B	ENSG00000031003	protein_coding	3150.39	-0.134101	0.0654835	-2.04786	0.0405738	0.110666
ARHGAP31	ENSG00000031081	protein_coding	690.355	0.978557	0.197283	4.96016	7.04357e-07	1.47751e-05
CENPQ	ENSG00000031691	protein_coding	257.985	-0.293291	0.0915576	-3.20335	0.00135841	0.00799116
SARS1	ENSG00000031698	protein_coding	2128.18	0.26411	0.0691304	3.82046	0.000133205	0.00121253
RANBP3	ENSG00000031823	protein_coding	2167.36	0.132501	0.0505739	2.61995	0.00879434	0.0345844
ARID4A	ENSG00000032219	protein_coding	2968.77	-0.100013	0.0572149	-1.74803	0.0804585	0.183513
EIPR1	ENSG00000032389	protein_coding	848.418	0.0844894	0.0615073	1.37365	0.169551	0.314627
PNPLA6	ENSG00000032444	protein_coding	3205.6	0.692531	0.12043	5.7505	8.89782e-09	3.13106e-07
IFT88	ENSG00000032742	protein_coding	480.064	-0.190213	0.076086	-2.49997	0.0124203	0.0452214
ALG1	ENSG00000033011	protein_coding	409.538	0.100434	0.0743091	1.35158	0.176511	0.323701
ZCCHC8	ENSG00000033030	protein_coding	1475.4	-0.0800178	0.0498242	-1.606	0.108274	0.228443
ABCF2	ENSG00000033050	protein_coding	1630.03	0.0173929	0.0754316	0.230578	0.817643	0.893164
CHPF2	ENSG00000033100	protein_coding	3132.01	0.0485814	0.0932935	0.520738	0.602549	0.740945
LRRC7	ENSG00000033122	protein_coding	114.513	-0.0287889	0.100018	-0.287836	0.773472	0.864208
FUT8	ENSG00000033170	protein_coding	884.545	-0.428713	0.0950733	-4.50929	6.50448e-06	9.71571e-05
UBA6	ENSG00000033178	protein_coding	2825.89	-0.263826	0.0550681	-4.7909	1.66034e-06	3.06237e-05
GAB2	ENSG00000033327	protein_coding	4633.28	-0.00376203	0.103925	-0.0361994	0.971123	0.984051
ATP6V0A1	ENSG00000033627	protein_coding	2740.9	0.835061	0.147971	5.6434	1.66723e-08	5.52868e-07
PIAS1	ENSG00000033800	protein_coding	4890.36	0.136883	0.0463218	2.95505	0.00312618	0.0155025
SLC4A7	ENSG00000033867	protein_coding	2000.97	-0.138362	0.151264	-0.914704	0.360347	0.530028
APBA2	ENSG00000034053	protein_coding	316.755	-0.300017	0.251292	-1.1939	0.232518	0.392652
MAP2K3	ENSG00000034152	protein_coding	2751.11	0.431082	0.0998529	4.31717	1.58041e-05	0.000205208
EFCAB1	ENSG00000034239	protein_coding	2.5413	0.209026	0.381314	0.548174	0.583572	0.726318
TMSB10	ENSG00000034510	protein_coding	11587.7	0.347406	0.13606	2.55334	0.0106697	0.0402228
ASTE1	ENSG00000034533	protein_coding	425.875	-0.135954	0.0462088	-2.94216	0.00325928	0.0160191
RNF19A	ENSG00000034677	protein_coding	2637.59	0.0674564	0.0607053	1.11121	0.266478	0.431381
PEX3	ENSG00000034693	protein_coding	478.74	-0.523349	0.0853588	-6.13117	8.72363e-10	3.95177e-08
GABARAPL2	ENSG00000034713	protein_coding	1274.19	0.147756	0.0658996	2.24215	0.024952	0.0768258
MYOC	ENSG00000034971	protein_coding	1.26334	-0.0613212	0.377976	-0.162236	0.87112	0.926311
SH3YL1	ENSG00000035115	protein_coding	1137.37	-0.434636	0.0766195	-5.67266	1.40598e-08	4.74402e-07
FAM136A	ENSG00000035141	protein_coding	1581.27	-0.220828	0.0703679	-3.13819	0.00169994	0.00957567
VCL	ENSG00000035403	protein_coding	6884.54	0.338544	0.116395	2.90859	0.00363067	0.0173835
DEPDC1B	ENSG00000035499	protein_coding	502.429	-0.320764	0.138028	-2.32391	0.0201301	0.0653591
DAPK2	ENSG00000035664	protein_coding	190.822	0.227947	0.204288	1.11581	0.264503	0.429182
NSMAF	ENSG00000035681	protein_coding	3788.42	-0.168438	0.0614828	-2.73959	0.00615158	0.0262354
ADSS2	ENSG00000035687	protein_coding	2451.62	-0.248302	0.0585999	-4.23725	2.26278e-05	0.000278235
STAP1	ENSG00000035720	protein_coding	441.611	-0.998255	0.169974	-5.873	4.27979e-09	1.62753e-07
TIMP2	ENSG00000035862	protein_coding	5682.89	0.511971	0.107989	4.74095	2.12715e-06	3.76505e-05
RFC1	ENSG00000035928	protein_coding	2305.66	-0.154048	0.0604448	-2.54857	0.0108165	0.0406553
TBC1D23	ENSG00000036054	protein_coding	1380.89	-0.100025	0.0560811	-1.78357	0.0744929	0.17316
CUL3	ENSG00000036257	protein_coding	3109.12	0.0153108	0.0524715	0.291794	0.770444	0.862524
MYOM2	ENSG00000036448	protein_coding	149.692	-0.632974	0.198924	-3.18199	0.00146269	0.00846408
OTC	ENSG00000036473	protein_coding	0.113245	0.0470277	1.09537	0.0429331	0.965755
CYP46A1	ENSG00000036530	protein_coding	118.451	-0.082509	0.376443	-0.219181	0.826509	0.899
ZZZ3	ENSG00000036549	protein_coding	2481.65	-0.181734	0.0599884	-3.02949	0.0024497	0.0127696
SLC18A1	ENSG00000036565	protein_coding	11.2081	0.300112	0.22045	1.36136	0.1734	0.319716
USP2	ENSG00000036672	protein_coding	44.1508	0.0461838	0.264294	0.174744	0.861281	0.920799
CASR	ENSG00000036828	protein_coding	2.17726	0.380401	0.257754	1.47583	0.13999	0.27502
TUBG2	ENSG00000037042	protein_coding	269.481	0.540325	0.149911	3.60429	0.000313004	0.0024487
RPL26L1	ENSG00000037241	protein_coding	213.538	0.0344857	0.0745537	0.462561	0.643679	0.771937
FLT4	ENSG00000037280	protein_coding	430.326	-0.397642	0.343043	-1.15916	0.246391	0.408987
NSUN2	ENSG00000037474	protein_coding	2626.14	0.0989698	0.0558143	1.7732	0.076196	0.176075
FBXO42	ENSG00000037637	protein_coding	2533.71	0.0879744	0.0340574	2.58312	0.00979103	0.0375625
MFAP3	ENSG00000037749	protein_coding	620.033	-0.0386558	0.096998	-0.398521	0.690246	0.806455
MRI1	ENSG00000037757	protein_coding	1443.12	0.104276	0.0928705	1.12281	0.261517	0.42569
METTL1	ENSG00000037897	protein_coding	335.588	-0.242476	0.0906145	-2.67591	0.00745271	0.0304309
HOXC8	ENSG00000037965	protein_coding	1.41424	-0.335919	0.338339	-0.992847	0.320785	0.489958
AGA	ENSG00000038002	protein_coding	593.655	0.0349621	0.0908738	0.384732	0.700436	0.814088
PI4K2B	ENSG00000038210	protein_coding	526.803	-0.0457	0.0795546	-0.574448	0.565664	0.712011
BOD1L1	ENSG00000038219	protein_coding	6432.35	0.0534133	0.0625305	0.854195	0.392997	0.561299
MAT2B	ENSG00000038274	protein_coding	2664.9	-0.0520375	0.0686003	-0.758562	0.448115	0.612685
TLL1	ENSG00000038295	protein_coding	1.2981	0.0866942	0.400817	0.216294	0.828759	0.900655
EDC4	ENSG00000038358	protein_coding	3213.43	0.188914	0.0835268	2.26172	0.0237145	0.0739668
TRIO	ENSG00000038382	protein_coding	6123.4	-0.0745808	0.117906	-0.632547	0.52703	0.680272
VCAN	ENSG00000038427	protein_coding	28600.2	3.01964	0.324496	9.30562	1.33211e-20	3.88265e-18
CLEC16A	ENSG00000038532	protein_coding	2578.17	0.131073	0.0419004	3.12821	0.00175876	0.00981586
MSR1	ENSG00000038945	protein_coding	261.804	3.24861	0.3343	9.71766	2.53548e-22	9.60081e-20
CDH1	ENSG00000039068	protein_coding	143.755	-0.391666	0.311459	-1.25752	0.208565	0.363954
MTREX	ENSG00000039123	protein_coding	2851.12	-0.151163	0.0588125	-2.57026	0.0101622	0.0386817
DNAH5	ENSG00000039139	protein_coding	6.30568	-0.0259723	0.320864	-0.0809448	0.935486	0.964258
ZFYVE16	ENSG00000039319	protein_coding	1825.92	0.209291	0.0905807	2.31055	0.0208579	0.0672197
RIPOR1	ENSG00000039523	protein_coding	3325.25	0.706858	0.0950805	7.43431	1.05112e-13	1.00796e-11
C6	ENSG00000039537	protein_coding	1.16386	0.500892	0.488412	1.02555	0.305102	0.473173
RAI14	ENSG00000039560	protein_coding	81.2654	0.431642	0.309072	1.39657	0.162543	0.305709
SOX30	ENSG00000039600	protein_coding	7.78794	-0.115938	0.248632	-0.466305	0.640997	0.769826
PNKP	ENSG00000039650	protein_coding	1372.35	0.218674	0.0826483	2.64584	0.00814888	0.0326007
BEST2	ENSG00000039987	protein_coding	16.632	-0.236912	0.135936	-1.74282	0.0813658	0.185001
PHLPP2	ENSG00000040199	protein_coding	476.452	0.126467	0.122125	1.03555	0.300411	0.468433
SPDL1	ENSG00000040275	protein_coding	588.53	-0.249641	0.0907239	-2.75166	0.00592936	0.0255013
STAU2	ENSG00000040341	protein_coding	1729.07	-0.355134	0.0796387	-4.45931	8.22236e-06	0.000118003
SLC66A1	ENSG00000040487	protein_coding	749.553	0.726302	0.121995	5.95352	2.62434e-09	1.04966e-07
CTNS	ENSG00000040531	protein_coding	774.139	0.226564	0.0777965	2.91227	0.00358818	0.0172135
RTN4R	ENSG00000040608	protein_coding	466.584	-0.999438	0.229532	-4.35425	1.33525e-05	0.00017744
PHF23	ENSG00000040633	protein_coding	867.088	-0.109977	0.0836739	-1.31436	0.188726	0.339649
CDH10	ENSG00000040731	protein_coding	5.28134	-0.787612	0.378791	-2.07928	0.0375918	0.104501
INPP4A	ENSG00000040933	protein_coding	3338.3	0.408657	0.0751862	5.43527	5.47137e-08	1.56487e-06
RAB27B	ENSG00000041353	protein_coding	1384.09	-0.118825	0.263921	-0.450228	0.652546	0.778546
PSMA4	ENSG00000041357	protein_coding	3173.77	0.04423	0.0680659	0.649812	0.515814	0.671153
MYO16	ENSG00000041515	protein_coding	13.6882	-0.120604	0.247374	-0.487538	0.625877	0.758747
LSG1	ENSG00000041802	protein_coding	1919.59	-0.16346	0.0504219	-3.24186	0.00118754	0.00720115
PARP3	ENSG00000041880	protein_coding	388.53	0.699026	0.140874	4.96207	6.97474e-07	1.46446e-05
TNC	ENSG00000041982	protein_coding	340.022	0.0812351	0.245442	0.330975	0.740663	0.842325
THAP3	ENSG00000041988	protein_coding	240.425	-0.0161313	0.0784472	-0.205632	0.837078	0.906271
RIPOR3	ENSG00000042062	protein_coding	854.868	-0.261579	0.180934	-1.44572	0.148256	0.28672
TDP1	ENSG00000042088	protein_coding	1057.87	-0.161592	0.055408	-2.91641	0.00354084	0.0170399
AIFM2	ENSG00000042286	protein_coding	142.891	0.728718	0.164975	4.41714	1.00013e-05	0.000138943
C2orf83	ENSG00000042304	protein_coding	0.633298	-0.0617159	0.40051	-0.154093	0.877536	0.930261
SPATA7	ENSG00000042317	protein_coding	304.798	-0.366454	0.0758351	-4.83225	1.34999e-06	2.56688e-05
MED17	ENSG00000042429	protein_coding	1460.49	-0.302752	0.0544097	-5.56429	2.63215e-08	8.23531e-07
RETSAT	ENSG00000042445	protein_coding	1004.52	0.233219	0.0744363	3.13313	0.00172952	0.00969665
CAPG	ENSG00000042493	protein_coding	3073.06	0.607577	0.210626	2.88462	0.00391884	0.0184816
AP2S1	ENSG00000042753	protein_coding	1023.45	0.330734	0.110469	2.9939	0.0027544	0.0140375
USH2A	ENSG00000042781	protein_coding	11.4	-0.405359	0.169815	-2.38706	0.0169837	0.0573628
ZPBP	ENSG00000042813	protein_coding	1.57647	-0.550649	0.353413	-1.55809	0.119213	0.245046
TG	ENSG00000042832	protein_coding	73.2512	0.435087	0.171638	2.53491	0.0112477	0.0419237
ADAM28	ENSG00000042980	protein_coding	3267.33	0.504257	0.187148	2.69444	0.00705074	0.0291232
BARX2	ENSG00000043039	protein_coding	1.06102	-0.152106	0.257136	-0.591538	0.55416	0.702761
DCUN1D1	ENSG00000043093	protein_coding	1692	-0.106328	0.060574	-1.75534	0.0792014	0.181327
JADE2	ENSG00000043143	protein_coding	3597.18	0.0338537	0.076631	0.441776	0.658652	0.783185
ZIC2	ENSG00000043355	protein_coding	1.19679	-0.440472	0.287736	-1.53082	0.125813	0.255169
LCP2	ENSG00000043462	protein_coding	6699.26	0.315433	0.0739896	4.2632	2.01518e-05	0.000251914
TRIT1	ENSG00000043514	protein_coding	655.062	-0.0115504	0.0541444	-0.213326	0.831072	0.902117
ADRB1	ENSG00000043591	protein_coding	115.678	0.323076	0.323176	0.999691	0.31746	0.48644
GUCA2B	ENSG00000044012	protein_coding	0.112893	0.199903	1.09557	0.182464	0.855219
CUL7	ENSG00000044090	protein_coding	1679.14	-0.0407043	0.0773261	-0.526399	0.598611	0.737884
CTNNA1	ENSG00000044115	protein_coding	3704.93	0.507184	0.117704	4.30897	1.64015e-05	0.000211723
PHKA2	ENSG00000044446	protein_coding	3325.58	0.37	0.0863747	4.28366	1.8384e-05	0.000233438
CNTLN	ENSG00000044459	protein_coding	873.282	0.104235	0.119988	0.868715	0.385003	0.553604
EPHA3	ENSG00000044524	protein_coding	4.51454	-0.245201	0.362753	-0.675945	0.499076	0.65734
HSPA5	ENSG00000044574	protein_coding	14959.2	-0.132666	0.140529	-0.944047	0.345145	0.514657
DSG2	ENSG00000046604	protein_coding	301.424	0.609283	0.479933	1.26952	0.204257	0.358683
GEMIN8	ENSG00000046647	protein_coding	467.749	-0.0998122	0.0697492	-1.43102	0.152426	0.292157
OFD1	ENSG00000046651	protein_coding	2168.19	0.195204	0.0745954	2.61683	0.00887502	0.0348048
GPM6B	ENSG00000046653	protein_coding	441.111	-0.316296	0.168003	-1.88268	0.0597443	0.147252
MAGEC2	ENSG00000046774	protein_coding	0.188068	0.464143	1.20272	0.385911	0.699562
PREX2	ENSG00000046889	protein_coding	41.0533	-0.894562	0.355429	-2.51685	0.011841	0.0435851
WDR37	ENSG00000047056	protein_coding	1962.46	0.230272	0.0577992	3.984	6.77647e-05	0.000700953
YTHDC2	ENSG00000047188	protein_coding	2008	0.0438954	0.0678493	0.646953	0.517662	0.672649
CTPS2	ENSG00000047230	protein_coding	1089.14	-0.15464	0.0799085	-1.93521	0.0529647	0.134815
ATP6V1H	ENSG00000047249	protein_coding	1125.95	0.0314652	0.0596729	0.527295	0.597989	0.737492
POLR2B	ENSG00000047315	protein_coding	4374.57	-0.0378997	0.048763	-0.777223	0.437027	0.603203
FAM214A	ENSG00000047346	protein_coding	1926.63	-0.210339	0.0727326	-2.89195	0.00382861	0.018114
ARAP2	ENSG00000047365	protein_coding	1842.84	0.143693	0.152544	0.941982	0.346202	0.515702
TPR	ENSG00000047410	protein_coding	7644.04	-0.117494	0.0638505	-1.84015	0.0657466	0.157908
CP	ENSG00000047457	protein_coding	280.3	0.0197287	0.196853	0.10022	0.920169	0.956326
KIAA0556	ENSG00000047578	protein_coding	1371.12	0.275473	0.0712058	3.86869	0.000109422	0.00103473
DTNBP1	ENSG00000047579	protein_coding	767.62	-0.0522984	0.0509546	-1.02637	0.304716	0.472879
XK	ENSG00000047597	protein_coding	509.964	-1.32131	0.275911	-4.78888	1.67712e-06	3.09075e-05
ANO2	ENSG00000047617	protein_coding	9.10684	0.553662	0.323905	1.70933	0.0873891	0.194974
C12orf4	ENSG00000047621	protein_coding	728.207	0.0724103	0.0645079	1.1225	0.261648	0.425841
SCML1	ENSG00000047634	protein_coding	193.861	0.526868	0.233805	2.25345	0.0242307	0.0751777
WWC3	ENSG00000047644	protein_coding	1169	0.0933142	0.159054	0.586683	0.557417	0.705505
ARHGAP6	ENSG00000047648	protein_coding	114.691	-0.204994	0.32487	-0.631002	0.528039	0.68096
FAM184B	ENSG00000047662	protein_coding	72.2544	-0.221166	0.0827443	-2.67289	0.00752011	0.0306583
MAP4	ENSG00000047849	protein_coding	6077.13	-0.0597016	0.0639369	-0.933758	0.350429	0.519736
GOPC	ENSG00000047932	protein_coding	2043.19	-0.239661	0.0572278	-4.18784	2.81626e-05	0.0003354
ROS1	ENSG00000047936	protein_coding	3.19869	-0.960856	0.627434	-1.5314	0.12567	0.254982
USP28	ENSG00000048028	protein_coding	1025.06	0.000230558	0.0779025	0.00295957	0.997639	0.999285
HDAC9	ENSG00000048052	protein_coding	1542.12	0.806626	0.220864	3.65214	0.000260059	0.00211053
TSPAN17	ENSG00000048140	protein_coding	838.028	0.262191	0.121321	2.16113	0.0306851	0.0897795
NOP16	ENSG00000048162	protein_coding	701.536	-0.177598	0.0835126	-2.1266	0.0334532	0.0957972
CC2D2A	ENSG00000048342	protein_coding	360.192	0.813287	0.162402	5.00785	5.50405e-07	1.19591e-05
RRM2B	ENSG00000048392	protein_coding	1197.57	0.0112737	0.077563	0.145349	0.884435	0.934467
ZNF800	ENSG00000048405	protein_coding	1856.42	-0.102997	0.0704315	-1.46237	0.14364	0.280166
TNFRSF17	ENSG00000048462	protein_coding	76.51	0.186914	0.198471	0.941771	0.34631	0.51582
SNX29	ENSG00000048471	protein_coding	2326.77	0.231475	0.0788898	2.93416	0.00334451	0.0163383
LMO3	ENSG00000048540	protein_coding	59.6435	-0.363761	0.224539	-1.62003	0.105226	0.22362
MRPS10	ENSG00000048544	protein_coding	1045.47	-0.0970825	0.0538466	-1.80295	0.0713965	0.16774
GUCA1A	ENSG00000048545	protein_coding	2.95263	0.0307187	0.206066	0.149072	0.881497	0.932652
RSF1	ENSG00000048649	protein_coding	3354.42	-0.194493	0.0556945	-3.49213	0.00047918	0.00347308
VPS13D	ENSG00000048707	protein_coding	4889.59	0.0920882	0.0688213	1.33808	0.180872	0.329447
CELF2	ENSG00000048740	protein_coding	14226.9	0.0505736	0.0641587	0.788258	0.430546	0.597384
FAM120A	ENSG00000048828	protein_coding	8543.34	0.245828	0.0591593	4.15535	3.2479e-05	0.000377151
R3HDM1	ENSG00000048991	protein_coding	2847.86	-0.188974	0.0372198	-5.07725	3.82933e-07	8.68668e-06
COL9A2	ENSG00000049089	protein_coding	728.912	1.34633	0.222969	6.03821	1.55833e-09	6.60028e-08
KITLG	ENSG00000049130	protein_coding	67.7344	0.411561	0.268886	1.53061	0.125865	0.255262
ERCC8	ENSG00000049167	protein_coding	457.458	-0.0949395	0.0601208	-1.57915	0.114302	0.237677
ADAMTS6	ENSG00000049192	protein_coding	161.262	-0.576124	0.220632	-2.61125	0.00902131	0.0352288
H6PD	ENSG00000049239	protein_coding	3910.24	0.114568	0.0979571	1.16958	0.242171	0.404041
VAMP3	ENSG00000049245	protein_coding	2156.02	0.329758	0.0833443	3.95657	7.60339e-05	0.000767493
PER3	ENSG00000049246	protein_coding	233.532	0.0225781	0.245287	0.0920476	0.92666	0.960076
UTS2	ENSG00000049247	protein_coding	11.2135	-0.901734	0.348343	-2.58864	0.00963561	0.0371012
TNFRSF9	ENSG00000049249	protein_coding	49.1118	0.453978	0.193828	2.34216	0.0191723	0.0629644
EPN3	ENSG00000049283	protein_coding	10.1577	0.487027	0.24188	2.01351	0.0440613	0.11769
LTBP1	ENSG00000049323	protein_coding	1543.94	-0.513337	0.333982	-1.53702	0.124289	0.252852
RCN1	ENSG00000049449	protein_coding	1807.86	-0.59063	0.0942664	-6.26554	3.71543e-10	1.82691e-08
ELN	ENSG00000049540	protein_coding	194.921	0.915405	0.353049	2.59285	0.00951835	0.0367389
RFC2	ENSG00000049541	protein_coding	903.762	-0.0564377	0.0706994	-0.798277	0.42471	0.591901
ARID1B	ENSG00000049618	protein_coding	8412.18	-0.297034	0.0732156	-4.05698	4.97118e-05	0.000541925
CLPTM1L	ENSG00000049656	protein_coding	2737.22	0.0182413	0.0619629	0.294391	0.76846	0.861102
NEDD4L	ENSG00000049759	protein_coding	290.481	0.146195	0.26249	0.556954	0.577559	0.72159
FOXP3	ENSG00000049768	protein_coding	87.3853	0.34432	0.101749	3.38402	0.000714337	0.00480816
PPP1R3F	ENSG00000049769	protein_coding	131.301	-0.0709017	0.0986882	-0.718441	0.472485	0.634588
HEXB	ENSG00000049860	protein_coding	2581.56	0.763723	0.136035	5.61417	1.97503e-08	6.41022e-07
PTCD2	ENSG00000049883	protein_coding	848.212	-0.0531543	0.0806047	-0.659444	0.509611	0.666223
NEXMIF	ENSG00000050030	protein_coding	10.3077	-0.152504	0.260065	-0.586407	0.557602	0.70557
JKAMP	ENSG00000050130	protein_coding	1605.76	0.090427	0.0586681	1.54133	0.123236	0.251264
DKK3	ENSG00000050165	protein_coding	8.52808	0.0262343	0.190998	0.137354	0.890751	0.937971
ARHGEF5	ENSG00000050327	protein_coding	39.1022	0.132072	0.233465	0.565702	0.571596	0.716829
NFE2L3	ENSG00000050344	protein_coding	887.158	0.0545151	0.13326	0.409089	0.682474	0.801029
MCUR1	ENSG00000050393	protein_coding	1047.38	-0.240904	0.0570655	-4.22153	2.42653e-05	0.000295174
LIMA1	ENSG00000050405	protein_coding	834.823	-0.151704	0.106763	-1.42094	0.155335	0.29598
LETMD1	ENSG00000050426	protein_coding	2746.7	0.0111314	0.0465299	0.239231	0.810927	0.888852
SLC4A8	ENSG00000050438	protein_coding	553.778	0.464707	0.129559	3.58685	0.000334694	0.00258102
LAMC3	ENSG00000050555	protein_coding	130.306	-2.42879	0.292191	-8.31233	9.38393e-17	1.59899e-14
PTGER3	ENSG00000050628	protein_coding	190.4	-1.8595	0.410093	-4.53435	5.77814e-06	8.80595e-05
TNIP3	ENSG00000050730	protein_coding	10.6551	0.225039	0.215677	1.04341	0.296758	0.464618
MAPK9	ENSG00000050748	protein_coding	1667.28	0.0251872	0.0444757	0.566313	0.571181	0.71641
COL23A1	ENSG00000050767	protein_coding	908.722	-1.26409	0.316767	-3.9906	6.59074e-05	0.000685446
BCAR1	ENSG00000050820	protein_coding	20.8909	0.111407	0.260505	0.42766	0.668899	0.7909
FAM160A2	ENSG00000051009	protein_coding	2716.65	0.36681	0.0859807	4.26619	1.98843e-05	0.000249345
HERPUD1	ENSG00000051108	protein_coding	2776.94	0.602528	0.123325	4.88568	1.03071e-06	2.0322e-05
HOMER3	ENSG00000051128	protein_coding	1875.82	0.00639103	0.229979	0.0277897	0.97783	0.987698
RAD51	ENSG00000051180	protein_coding	506.107	-0.134725	0.0996583	-1.35187	0.176416	0.32358
POLQ	ENSG00000051341	protein_coding	1428.44	-0.149868	0.12727	-1.17756	0.238972	0.400408
PIK3CB	ENSG00000051382	protein_coding	3665.62	-0.274987	0.103772	-2.6499	0.00805149	0.0322722
CYBA	ENSG00000051523	protein_coding	8209.08	0.624617	0.128304	4.86827	1.12579e-06	2.19139e-05
THOC3	ENSG00000051596	protein_coding	179.218	0.0218549	0.0865638	0.252472	0.800676	0.88213
HEBP2	ENSG00000051620	protein_coding	2010.49	0.436509	0.0878238	4.97028	6.68564e-07	1.41247e-05
MPHOSPH9	ENSG00000051825	protein_coding	4033.35	-0.268868	0.0630764	-4.26257	2.02086e-05	0.000252553
PLEKHA5	ENSG00000052126	protein_coding	1468.69	-0.49075	0.133432	-3.67789	0.000235168	0.00194124
PRSS8	ENSG00000052344	protein_coding	31.3012	0.0947169	0.12227	0.774656	0.438543	0.604435
SIKE1	ENSG00000052723	protein_coding	1831.13	-0.0899523	0.0591012	-1.52201	0.128008	0.258389
RRP12	ENSG00000052749	protein_coding	3827.55	0.65612	0.1451	4.52185	6.13027e-06	9.26609e-05
FNIP2	ENSG00000052795	protein_coding	1112.54	0.588663	0.128049	4.59716	4.28292e-06	6.82785e-05
MSMO1	ENSG00000052802	protein_coding	484.674	-0.0246545	0.113101	-0.217986	0.82744	0.899702
TTC17	ENSG00000052841	protein_coding	7109.3	-0.0814815	0.0528128	-1.54284	0.12287	0.250727
ALX4	ENSG00000052850	protein_coding	33.9054	-0.439735	0.154734	-2.84187	0.00448493	0.020529
FSTL4	ENSG00000053108	protein_coding	5.83502	-0.321434	0.220153	-1.46005	0.144277	0.2811
FOXN3	ENSG00000053254	protein_coding	4715.7	0.0452477	0.07408	0.610796	0.541335	0.692394
METTL24	ENSG00000053328	protein_coding	14.3419	-0.690688	0.228324	-3.02504	0.00248602	0.0129285
AKR7A2	ENSG00000053371	protein_coding	1033.15	0.30665	0.112792	2.71873	0.00655334	0.0275562
MRTO4	ENSG00000053372	protein_coding	853.016	-0.186346	0.0805218	-2.31423	0.0206549	0.0667208
NNAT	ENSG00000053438	protein_coding	145.058	0.29052	0.0740239	3.92468	8.68467e-05	0.000856919
USE1	ENSG00000053501	protein_coding	614.707	-0.0135072	0.083319	-0.162114	0.871216	0.926317
MCF2L2	ENSG00000053524	protein_coding	80.5472	-0.400417	0.187057	-2.14061	0.0323052	0.0933543
NRIP2	ENSG00000053702	protein_coding	561.657	-0.0660864	0.0624301	-1.05857	0.289797	0.456786
LAMA3	ENSG00000053747	protein_coding	71.431	0.818065	0.310976	2.63064	0.0085225	0.0337148
AP5M1	ENSG00000053770	protein_coding	1836.04	-0.0229221	0.0569301	-0.402635	0.687217	0.804273
ANAPC4	ENSG00000053900	protein_coding	1956.52	0.0273625	0.0497952	0.5495	0.582662	0.725723
KCNQ1	ENSG00000053918	protein_coding	571.689	1.92213	0.201239	9.55147	1.27873e-21	4.33824e-19
TRAPPC3	ENSG00000054116	protein_coding	1158.51	0.11913	0.0524031	2.27334	0.0230056	0.0723194
THRAP3	ENSG00000054118	protein_coding	6112.72	-0.104837	0.0432279	-2.42523	0.0152989	0.0529441
PHPT1	ENSG00000054148	protein_coding	879.668	0.0834044	0.126482	0.659418	0.509628	0.666223
ENTPD2	ENSG00000054179	protein_coding	7.478	0.242775	0.253594	0.957337	0.338397	0.507722
LY75	ENSG00000054219	protein_coding	1422.42	-0.126147	0.0970913	-1.29926	0.193854	0.345769
ARID4B	ENSG00000054267	protein_coding	4052.26	-0.145288	0.0587195	-2.47427	0.013351	0.0477393
OPN3	ENSG00000054277	protein_coding	430.211	0.284235	0.112532	2.52582	0.011543	0.0427584
SDCCAG8	ENSG00000054282	protein_coding	2186.58	-0.370437	0.0748233	-4.95082	7.39016e-07	1.53856e-05
PTPRN	ENSG00000054356	protein_coding	3.35169	-0.0376764	0.232981	-0.161715	0.87153	0.9264
HHAT	ENSG00000054392	protein_coding	329.951	-0.240078	0.133872	-1.79333	0.0729194	0.17046
KIF1B	ENSG00000054523	protein_coding	2404.77	0.674268	0.144143	4.67779	2.89989e-06	4.89424e-05
FOXC1	ENSG00000054598	protein_coding	469.978	0.10221	0.37772	0.270597	0.786701	0.872588
TBC1D22A	ENSG00000054611	protein_coding	1475.75	0.325563	0.0580534	5.60799	2.04691e-08	6.61446e-07
SYNE2	ENSG00000054654	protein_coding	1550.04	-0.000112772	0.221608	-0.000508882	0.999594	0.99984
PLEKHH1	ENSG00000054690	protein_coding	39.5612	0.316319	0.180841	1.74916	0.0802639	0.183212
ATP9A	ENSG00000054793	protein_coding	450.563	-1.35294	0.304173	-4.44792	8.67041e-06	0.000123473
SPO11	ENSG00000054796	protein_coding	0.20035	0.234326	0.558066	0.419889	0.674566
CBLN4	ENSG00000054803	protein_coding	0.459149	-0.47361	0.395819	-1.19653	0.231489	0.391288
CHRDL2	ENSG00000054938	protein_coding	4.33273	0.269774	0.190934	1.41292	0.157679	0.299248
FAM168A	ENSG00000054965	protein_coding	3497.57	0.412327	0.0777934	5.30028	1.15623e-07	3.04725e-06
RELT	ENSG00000054967	protein_coding	2903.91	1.02567	0.142979	7.17358	7.30607e-13	5.97197e-11
GALC	ENSG00000054983	protein_coding	1550.93	-0.270736	0.161132	-1.68021	0.0929163	0.20418
NOP58	ENSG00000055044	protein_coding	3895.71	-0.40341	0.0712	-5.66586	1.46288e-08	4.89835e-07
SZRD1	ENSG00000055070	protein_coding	3760.24	0.124007	0.0643416	1.92733	0.0539387	0.13671
KCNH2	ENSG00000055118	protein_coding	852.759	-0.687352	0.315574	-2.1781	0.0293989	0.0869457
CUL1	ENSG00000055130	protein_coding	2285.32	-0.0103638	0.0895588	-0.115721	0.907874	0.948711
FAM114A2	ENSG00000055147	protein_coding	751.027	-0.0595014	0.068706	-0.86603	0.386474	0.554917
CYFIP2	ENSG00000055163	protein_coding	5182.85	-0.124779	0.141652	-0.880883	0.378381	0.54736
TAB2	ENSG00000055208	protein_coding	4620.01	0.149539	0.0944626	1.58305	0.11341	0.236409
GINM1	ENSG00000055211	protein_coding	910.123	-0.14248	0.0579698	-2.45783	0.013978	0.0494584
EIF2AK2	ENSG00000055332	protein_coding	4570.11	-0.0704756	0.0968428	-0.727731	0.466778	0.629652
USP36	ENSG00000055483	protein_coding	3314.56	-0.158056	0.0770346	-2.05176	0.0401933	0.109885
KMT2C	ENSG00000055609	protein_coding	11005.1	0.00995507	0.0833542	0.119431	0.904934	0.947023
MCOLN3	ENSG00000055732	protein_coding	15.291	0.301823	0.23978	1.25875	0.208121	0.36338
CCDC85A	ENSG00000055813	protein_coding	1.59287	-0.369384	0.503839	-0.733139	0.463474	0.626741
PUM2	ENSG00000055917	protein_coding	7388.19	-0.197623	0.0414297	-4.77009	1.84146e-06	3.3408e-05
MRPL43	ENSG00000055950	protein_coding	744.347	0.124859	0.0711335	1.75528	0.0792116	0.181334
ITIH4	ENSG00000055955	protein_coding	118.929	0.134906	0.0967352	1.39459	0.16314	0.306512
ITIH1	ENSG00000055957	protein_coding	11.5507	0.926145	0.207766	4.45764	8.28664e-06	0.000118733
HPF1	ENSG00000056050	protein_coding	365.229	-0.0530119	0.0793396	-0.668165	0.504029	0.661615
ZFR	ENSG00000056097	protein_coding	5626.81	0.0790859	0.0894334	0.884299	0.376535	0.545583
ZNF280C	ENSG00000056277	protein_coding	552.16	-0.287991	0.0725714	-3.96838	7.23636e-05	0.000738012
NPFFR2	ENSG00000056291	protein_coding	0.234782	-0.416658	0.542468	-0.768079	0.442441
PHF21B	ENSG00000056487	protein_coding	1.59918	0.470388	0.241957	1.94409	0.051884	0.132791
TRAF1	ENSG00000056558	protein_coding	746.454	0.465724	0.125187	3.72022	0.000199052	0.00169785
RC3H2	ENSG00000056586	protein_coding	4099.48	-0.0315195	0.0666475	-0.472929	0.636264	0.766229
IL17RB	ENSG00000056736	protein_coding	137.676	-0.191419	0.0970041	-1.97331	0.0484602	0.126173
TRAF3IP2	ENSG00000056972	protein_coding	1243.8	-0.363939	0.0940162	-3.87102	0.000108379	0.00102813
GYG2	ENSG00000056998	protein_coding	104.498	-0.0439729	0.30768	-0.142918	0.886355	0.935358
DCBLD2	ENSG00000057019	protein_coding	474.006	-0.509281	0.174697	-2.91523	0.00355427	0.0170879
SERPINB3	ENSG00000057149	protein_coding	0.20925	-0.645465	1.28094	-0.503899	0.614332
SOAT1	ENSG00000057252	protein_coding	2286.02	0.665025	0.104089	6.38899	1.66985e-10	8.85982e-09
PKP2	ENSG00000057294	protein_coding	100.642	0.635454	0.391962	1.62121	0.104972	0.223242
MSH4	ENSG00000057468	protein_coding	30.7227	-0.405283	0.182471	-2.22108	0.0263453	0.0800645
F7	ENSG00000057593	protein_coding	6.48043	-0.119326	0.336797	-0.354296	0.723117	0.830619
GDI2	ENSG00000057608	protein_coding	9903.33	-0.0327916	0.0666159	-0.492248	0.622544	0.756129
PRDM1	ENSG00000057657	protein_coding	531.559	0.398649	0.161982	2.46107	0.0138523	0.0491273
ATG5	ENSG00000057663	protein_coding	964.134	-0.00350192	0.0482994	-0.0725045	0.9422	0.967646
TMCC3	ENSG00000057704	protein_coding	124.749	1.25594	0.2132	5.89091	3.84077e-09	1.47068e-07
PITHD1	ENSG00000057757	protein_coding	1050.06	-0.122142	0.0664606	-1.8378	0.0660912	0.158426
MTA3	ENSG00000057935	protein_coding	573.043	0.0566292	0.161526	0.350589	0.725896	0.832369
USP13	ENSG00000058056	protein_coding	748.26	-0.268258	0.100042	-2.68146	0.00733018	0.0300028
ATP11B	ENSG00000058063	protein_coding	4470.57	0.0496539	0.0847342	0.585996	0.557878	0.705719
LAMC2	ENSG00000058085	protein_coding	1.39185	0.621775	0.302301	2.05681	0.0397046	0.108905
CDK14	ENSG00000058091	protein_coding	574.182	-0.948737	0.166959	-5.68246	1.32773e-08	4.49713e-07
SEC61A1	ENSG00000058262	protein_coding	7480.62	0.0800571	0.0585976	1.36622	0.17187	0.317715
PPP1R12A	ENSG00000058272	protein_coding	6205.77	-0.0701883	0.0527495	-1.3306	0.183322	0.332479
RASGRF1	ENSG00000058335	protein_coding	63.4419	-0.911027	0.250859	-3.63163	0.000281639	0.00225306
CAMK2B	ENSG00000058404	protein_coding	16.5536	-0.328375	0.214766	-1.52899	0.126267	0.255831
CROCC	ENSG00000058453	protein_coding	799.532	0.288963	0.142453	2.02847	0.0425118	0.114555
POLR3E	ENSG00000058600	protein_coding	2074.19	-0.145142	0.0560674	-2.5887	0.0096339	0.0370978
ATP2B4	ENSG00000058668	protein_coding	10256.9	-0.099936	0.101735	-0.982315	0.325945	0.494868
ZC3H11A	ENSG00000058673	protein_coding	7332.76	-0.0378245	0.0472144	-0.801122	0.423061	0.590215
RIOK2	ENSG00000058729	protein_coding	703.287	-0.180844	0.0644419	-2.80631	0.00501132	0.0223852
YIPF1	ENSG00000058799	protein_coding	686.396	0.297369	0.0568368	5.23199	1.67699e-07	4.19275e-06
NDC1	ENSG00000058804	protein_coding	1727.77	-0.307752	0.0757293	-4.06384	4.82712e-05	0.000529216
DGKG	ENSG00000058866	protein_coding	2153.24	0.0167899	0.135581	0.123836	0.901445	0.944623
FLYWCH1	ENSG00000059122	protein_coding	2303.55	0.244474	0.107164	2.28132	0.0225297	0.0711936
UNKL	ENSG00000059145	protein_coding	1008.83	0.154265	0.0832324	1.85343	0.0638211	0.154633
TBXAS1	ENSG00000059377	protein_coding	3886.67	0.614161	0.127612	4.81273	1.48881e-06	2.79013e-05
PARP12	ENSG00000059378	protein_coding	1538.05	0.369377	0.113868	3.24392	0.00117899	0.00716105
ALDH18A1	ENSG00000059573	protein_coding	2466.1	-0.417549	0.0796643	-5.24135	1.59407e-07	4.01719e-06
TARBP1	ENSG00000059588	protein_coding	6742.68	-0.376899	0.0981811	-3.83881	0.000123632	0.00114324
GATB	ENSG00000059691	protein_coding	644.383	-0.0771884	0.0567491	-1.36017	0.173776	0.320104
MXD1	ENSG00000059728	protein_coding	5008.56	0.177645	0.145705	1.21921	0.222764	0.380896
CDK17	ENSG00000059758	protein_coding	1539.41	-0.23285	0.0833958	-2.79211	0.00523658	0.0231672
DNAJC25	ENSG00000059769	protein_coding	294.074	-0.224059	0.0743723	-3.01267	0.00258961	0.013359
SLC2A3	ENSG00000059804	protein_coding	5152.62	0.847212	0.178072	4.75771	1.95805e-06	3.51774e-05
PSD	ENSG00000059915	protein_coding	114.346	0.341939	0.112712	3.03375	0.00241537	0.0126293
CTDP1	ENSG00000060069	protein_coding	1732.97	-0.191925	0.0902803	-2.12588	0.0335129	0.0959061
YBX3	ENSG00000060138	protein_coding	7097.45	-0.188939	0.124082	-1.5227	0.127833	0.258143
STYK1	ENSG00000060140	protein_coding	158.264	-0.360383	0.250052	-1.44123	0.14952	0.288377
WNK1	ENSG00000060237	protein_coding	12498.2	0.176435	0.0710805	2.48219	0.0130579	0.0469719
RPS17P5	ENSG00000060303	processed_pseudogene	6.61761	-0.439469	0.16396	-2.68034	0.00735469	0.0300801
CCAR1	ENSG00000060339	protein_coding	5414.23	-0.119881	0.0400868	-2.99053	0.00278497	0.0141575
OGFR	ENSG00000060491	protein_coding	2037.48	0.789712	0.0999074	7.90445	2.69127e-15	3.55222e-13
GNA15	ENSG00000060558	protein_coding	4543.24	-0.295554	0.146244	-2.02096	0.0432838	0.116113
CREB3L3	ENSG00000060566	protein_coding	23.9201	-1.44473	0.333226	-4.33558	1.45376e-05	0.000191002
PIGV	ENSG00000060642	protein_coding	808.248	-0.347425	0.0729596	-4.76188	1.91798e-06	3.45415e-05
PTPRU	ENSG00000060656	protein_coding	58.22	-0.271415	0.298335	-0.909767	0.362946	0.532807
SNRNP40	ENSG00000060688	protein_coding	1321.39	-0.0380014	0.0493531	-0.76999	0.441306	0.606666
RIMBP2	ENSG00000060709	protein_coding	8.43451	1.94518	0.45454	4.27944	1.87366e-05	0.000237033
COL11A1	ENSG00000060718	protein_coding	9.61136	-0.181494	0.399723	-0.45405	0.649793	0.776558
QSER1	ENSG00000060749	protein_coding	2697.26	0.00586022	0.0822321	0.0712644	0.943187	0.968028
MPC1	ENSG00000060762	protein_coding	818.333	-0.0804912	0.0840084	-0.958133	0.337996	0.507293
ACAA1	ENSG00000060971	protein_coding	1535.45	0.485817	0.0850031	5.71528	1.09524e-08	3.77902e-07
BCAT1	ENSG00000060982	protein_coding	2799.1	-0.0717979	0.234599	-0.306045	0.75957	0.855025
HDAC7	ENSG00000061273	protein_coding	4490.53	0.387212	0.09725	3.98162	6.84483e-05	0.000706869
LZTS1	ENSG00000061337	protein_coding	22.2155	-0.896666	0.259446	-3.45608	0.000548092	0.00387151
PRDM6	ENSG00000061455	protein_coding	3.68802	0.198818	0.226933	0.876111	0.38097	0.549776
WNT8A	ENSG00000061492	protein_coding	2.19719	0.174733	0.306102	0.570832	0.568113	0.714018
SPAG4	ENSG00000061656	protein_coding	131.829	0.0707854	0.1359	0.520866	0.60246	0.74094
NCKAP1	ENSG00000061676	protein_coding	74.8439	-0.150604	0.253844	-0.593294	0.552984	0.701772
MRPS35	ENSG00000061794	protein_coding	1032.2	-0.137421	0.0662196	-2.07523	0.0379654	0.105249
GUCY1B1	ENSG00000061918	protein_coding	819.932	-0.0729205	0.23429	-0.31124	0.755618	0.852526
SFSWAP	ENSG00000061936	protein_coding	2650.01	0.0902202	0.0356925	2.52771	0.011481	0.0425783
TNK2	ENSG00000061938	protein_coding	5574.8	0.491242	0.105004	4.6783	2.89259e-06	4.88474e-05
MON2	ENSG00000061987	protein_coding	4108.47	-0.0275022	0.0603287	-0.455872	0.648482	0.775598
CDH3	ENSG00000062038	protein_coding	7.14124	0.150871	0.195364	0.772256	0.439963	0.605659
ARSF	ENSG00000062096	protein_coding	2.01558	0.988538	0.421978	2.34263	0.0191483	0.0629182
GPBP1	ENSG00000062194	protein_coding	3966.82	-0.118184	0.0422433	-2.79771	0.00514667	0.0228701
DGAT2	ENSG00000062282	protein_coding	224.053	1.2762	0.2157	5.91652	3.28819e-09	1.27787e-07
ZNF112	ENSG00000062370	protein_coding	97.2959	-0.195543	0.290065	-0.674136	0.500225	0.658372
CS	ENSG00000062485	protein_coding	6861.57	0.045548	0.052702	0.864255	0.387448	0.555865
LTK	ENSG00000062524	protein_coding	953.002	-1.75432	0.274189	-6.39823	1.57191e-10	8.37025e-09
MRPS24	ENSG00000062582	protein_coding	103.68	0.0765646	0.100455	0.76218	0.445953	0.610747
ELMO2	ENSG00000062598	protein_coding	2851.4	0.319	0.0749095	4.25847	2.05828e-05	0.000256579
WAPL	ENSG00000062650	protein_coding	3878.8	-0.105729	0.0534361	-1.9786	0.0478612	0.124994
VMP1	ENSG00000062716	protein_coding	5807.21	0.673051	0.117199	5.7428	9.31216e-09	3.26648e-07
APPBP2	ENSG00000062725	protein_coding	1701.68	-0.131621	0.0551466	-2.38675	0.0169981	0.0573895
POLD1	ENSG00000062822	protein_coding	2367.42	0.0324425	0.103407	0.313737	0.753721	0.851231
SEZ6	ENSG00000063015	protein_coding	261.527	-0.0620122	0.106969	-0.579721	0.562103	0.709158
EIF4B	ENSG00000063046	protein_coding	14570.4	-0.13838	0.0713725	-1.93885	0.0525201	0.133995
SLC6A16	ENSG00000063127	protein_coding	165.863	0.423101	0.112853	3.74913	0.000177449	0.00154238
BICRA	ENSG00000063169	protein_coding	1042.48	0.39002	0.101779	3.83204	0.000127087	0.00116982
SPHK2	ENSG00000063176	protein_coding	548.159	0.131437	0.082551	1.59219	0.111342	0.233097
RPL18	ENSG00000063177	protein_coding	14230.8	0.0406965	0.103041	0.394956	0.692875	0.808269
CA11	ENSG00000063180	protein_coding	82.4262	0.205305	0.140348	1.46283	0.143514	0.280013
ISOC2	ENSG00000063241	protein_coding	573.221	-0.13036	0.119838	-1.08781	0.27668	0.442681
U2AF2	ENSG00000063244	protein_coding	5370.53	0.0797329	0.0730654	1.09125	0.275161	0.441013
EPN1	ENSG00000063245	protein_coding	3086.99	0.450189	0.0984676	4.57195	4.83198e-06	7.55634e-05
MED29	ENSG00000063322	protein_coding	1397.62	0.258496	0.0495471	5.21718	1.81665e-07	4.5038e-06
AHRR	ENSG00000063438	protein_coding	56.7281	-0.0528373	0.224829	-0.235011	0.8142	0.891095
GSC2	ENSG00000063515	protein_coding	0.537851	-0.0548281	0.374457	-0.14642	0.88359	0.93386
ZNF275	ENSG00000063587	protein_coding	1081.08	-0.0354226	0.0800543	-0.442483	0.65814	0.782841
MTMR1	ENSG00000063601	protein_coding	1405.99	0.19463	0.0717682	2.71193	0.00668924	0.0280134
GPC1	ENSG00000063660	protein_coding	256.866	0.104875	0.147196	0.712486	0.476164	0.63748
ADCK1	ENSG00000063761	protein_coding	408.576	0.344005	0.0811489	4.23919	2.24331e-05	0.000276223
HAGH	ENSG00000063854	protein_coding	637.829	0.182067	0.0888089	2.0501	0.0403548	0.110224
RNF4	ENSG00000063978	protein_coding	3054.13	0.00543916	0.0427555	0.127215	0.89877	0.943023
CASP8	ENSG00000064012	protein_coding	3463.39	0.0691053	0.0601577	1.14874	0.250665	0.413725
LIMCH1	ENSG00000064042	protein_coding	49.0154	0.602112	0.336808	1.7877	0.0738242	0.171976
INTS13	ENSG00000064102	protein_coding	1455.14	-0.517391	0.0658589	-7.85606	3.96402e-15	4.98915e-13
TM7SF3	ENSG00000064115	protein_coding	7342.33	-0.89177	0.109216	-8.16517	3.20973e-16	5.00707e-14
DLX3	ENSG00000064195	protein_coding	3.43588	-0.917362	0.366022	-2.5063	0.0122002	0.0446046
SPA17	ENSG00000064199	protein_coding	86.2255	-0.0798772	0.146102	-0.546723	0.584569	0.727068
TSPAN32	ENSG00000064201	protein_coding	3839.22	0.475939	0.174938	2.72061	0.00651612	0.0274258
CCN5	ENSG00000064205	protein_coding	19.1737	-0.571262	0.230599	-2.4773	0.0132381	0.0474428
DMRT3	ENSG00000064218	protein_coding	0.595809	0.604891	0.56965	1.06186	0.288297	0.45541
ST3GAL6	ENSG00000064225	protein_coding	1362.63	-0.189629	0.145752	-1.30105	0.193243	0.344931
ATP2C2	ENSG00000064270	protein_coding	26.8948	0.190311	0.197568	0.963268	0.335413	0.504457
NGFR	ENSG00000064300	protein_coding	81.8013	-0.025765	0.274272	-0.0939394	0.925157	0.959282
CDON	ENSG00000064309	protein_coding	40.0194	-1.25183	0.201354	-6.21705	5.06601e-10	2.42832e-08
TAF2	ENSG00000064313	protein_coding	2111.59	-0.189463	0.0566605	-3.34382	0.000826326	0.00541549
HIPK2	ENSG00000064393	protein_coding	5501.86	0.544649	0.129854	4.19433	2.73682e-05	0.000326818
TNPO3	ENSG00000064419	protein_coding	3292.07	-0.0506145	0.0681767	-0.742402	0.457844	0.621428
BORCS8-MEF2B	ENSG00000064489	protein_coding	31.5232	0.219479	0.0809585	2.711	0.00670801	0.0280707
RFXANK	ENSG00000064490	protein_coding	876.911	0.102365	0.0875852	1.16874	0.242506	0.404433
TMEM161A	ENSG00000064545	protein_coding	612.295	-0.0388032	0.104221	-0.372316	0.709658	0.819945
LPAR2	ENSG00000064547	protein_coding	1271.42	0.639955	0.128813	4.9681	6.76137e-07	1.42581e-05
CTSA	ENSG00000064601	protein_coding	9426.52	0.300227	0.142076	2.11314	0.0345891	0.0981061
SUGP2	ENSG00000064607	protein_coding	7407.72	0.0389987	0.064813	0.601711	0.547367	0.697286
SLC12A2	ENSG00000064651	protein_coding	1252.03	-0.279159	0.126878	-2.20022	0.0277915	0.0833731
SNX24	ENSG00000064652	protein_coding	136.03	0.62724	0.196718	3.18851	0.00143006	0.00831772
EYA2	ENSG00000064655	protein_coding	7.30264	0.360411	0.286983	1.25586	0.209166	0.364557
CNN2	ENSG00000064666	protein_coding	4904.78	0.127014	0.132802	0.956411	0.338864	0.508216
ABCA7	ENSG00000064687	protein_coding	4041.65	0.751258	0.14783	5.08189	3.73695e-07	8.50324e-06
SNCAIP	ENSG00000064692	protein_coding	45.5047	-1.04731	0.444874	-2.35417	0.0185642	0.0614274
DDX20	ENSG00000064703	protein_coding	958.724	-0.222598	0.0538213	-4.13587	3.5361e-05	0.000406065
BTBD1	ENSG00000064726	protein_coding	2145.25	-0.000352833	0.0607604	-0.00580696	0.995367	0.998002
FAR2	ENSG00000064763	protein_coding	1577.58	0.269086	0.0894024	3.00984	0.00261389	0.0134561
BCAS1	ENSG00000064787	protein_coding	8.59078	0.455435	0.180237	2.52687	0.0115085	0.0426553
POU1F1	ENSG00000064835	protein_coding	1.62043	0.179829	0.287309	0.625906	0.531377	0.683911
CHI3L2	ENSG00000064886	protein_coding	62.6044	-0.00406847	0.149975	-0.0271277	0.978358	0.987924
SBNO2	ENSG00000064932	protein_coding	2777.52	0.553292	0.106542	5.19321	2.06704e-07	5.05107e-06
PMS1	ENSG00000064933	protein_coding	1348.84	-0.216631	0.057787	-3.74878	0.000177697	0.00154367
HMG20B	ENSG00000064961	protein_coding	1725.16	0.127537	0.101089	1.26163	0.207081	0.362134
CALCRL	ENSG00000064989	protein_coding	587.459	1.25079	0.313589	3.98863	6.64546e-05	0.000689656
TAF11	ENSG00000064995	protein_coding	1003.73	0.00155607	0.0454716	0.0342207	0.972701	0.985154
ANKS1A	ENSG00000064999	protein_coding	2239.16	-0.0650639	0.0893459	-0.728225	0.466476	0.62934
AP3D1	ENSG00000065000	protein_coding	5409.19	0.249686	0.060292	4.14127	3.45381e-05	0.000397439
ZNF76	ENSG00000065029	protein_coding	1868.94	0.0454375	0.0632555	0.718317	0.472562	0.634652
SLC9A3R2	ENSG00000065054	protein_coding	435.552	0.58034	0.221213	2.62345	0.00870448	0.0342969
NTHL1	ENSG00000065057	protein_coding	278.365	0.232672	0.115302	2.01794	0.0435975	0.116707
UHRF1BP1	ENSG00000065060	protein_coding	2865.15	-0.110804	0.060622	-1.82779	0.0675817	0.161032
GNAI3	ENSG00000065135	protein_coding	3641.06	0.154509	0.0603621	2.5597	0.0104763	0.0396221
IPO5	ENSG00000065150	protein_coding	5840.31	-0.202721	0.0725295	-2.79502	0.00518973	0.0230093
OAT	ENSG00000065154	protein_coding	1433.35	-0.0619845	0.14965	-0.414198	0.678729	0.798347
WDR3	ENSG00000065183	protein_coding	1407.98	-0.300373	0.0829884	-3.61946	0.000295216	0.00233916
PKN2	ENSG00000065243	protein_coding	3002.89	-0.0044433	0.0602271	-0.0737757	0.941189	0.96719
WDR18	ENSG00000065268	protein_coding	799.666	0.204635	0.107898	1.89655	0.0578873	0.143991
TRAM2	ENSG00000065308	protein_coding	2191.71	0.0727017	0.0848834	0.856489	0.391727	0.560334
NTN1	ENSG00000065320	protein_coding	465.814	-0.0672349	0.240557	-0.279497	0.779864	0.868484
GLP2R	ENSG00000065325	protein_coding	4.80008	0.138467	0.270255	0.512358	0.608401	0.745305
MCM10	ENSG00000065328	protein_coding	675.8	-0.233058	0.12676	-1.83858	0.065977	0.158247
DGKA	ENSG00000065357	protein_coding	3158.82	0.300318	0.105147	2.85618	0.00428777	0.0198207
ERBB3	ENSG00000065361	protein_coding	14.4911	-0.311452	0.128354	-2.4265	0.0152452	0.0528158
ROPN1	ENSG00000065371	protein_coding	0.515267	0.406368	0.419961	0.967631	0.333229	0.502298
ANKRD44	ENSG00000065413	protein_coding	4109.22	0.367773	0.101539	3.62199	0.00029234	0.00232106
KARS1	ENSG00000065427	protein_coding	3554.48	0.00154599	0.0596897	0.0259005	0.979337	0.988507
ADAT1	ENSG00000065457	protein_coding	1059.38	-0.00765561	0.0472863	-0.161899	0.871385	0.926334
PDIA5	ENSG00000065485	protein_coding	604.189	-0.379901	0.112994	-3.36215	0.000773393	0.00512698
TBC1D22B	ENSG00000065491	protein_coding	1170.88	-0.0793478	0.064877	-1.22305	0.221311	0.379367
NDUFB4	ENSG00000065518	protein_coding	1168.5	-0.0746651	0.0876613	-0.851745	0.394355	0.562695
SPEN	ENSG00000065526	protein_coding	10452.4	0.101306	0.0488202	2.07508	0.0379794	0.105269
MYLK	ENSG00000065534	protein_coding	621.698	0.0981279	0.209382	0.468654	0.639317	0.768599
ZC3H15	ENSG00000065548	protein_coding	2623.24	-0.127642	0.0618083	-2.06512	0.0389117	0.107275
MAP2K4	ENSG00000065559	protein_coding	1038.07	0.0538425	0.0506673	1.06267	0.287933	0.455155
PACC1	ENSG00000065600	protein_coding	881.809	-0.0197358	0.0651221	-0.303058	0.761845	0.856683
SNAP91	ENSG00000065609	protein_coding	2.23674	0.226911	0.363594	0.624077	0.532577	0.685202
SLK	ENSG00000065613	protein_coding	3385.41	-0.0487495	0.0825536	-0.590519	0.554843	0.703244
CYB5R4	ENSG00000065615	protein_coding	2396.98	0.102161	0.0846098	1.20743	0.227266	0.386153
COL17A1	ENSG00000065618	protein_coding	48.6928	-0.416332	0.20452	-2.03566	0.0417849	0.113161
GSTO2	ENSG00000065621	protein_coding	93.3346	0.39494	0.131667	2.99954	0.00270392	0.0138296
SEC61A2	ENSG00000065665	protein_coding	878.813	-0.132427	0.089782	-1.47498	0.140218	0.275321
PRKCQ	ENSG00000065675	protein_coding	994.855	-0.341366	0.138878	-2.45803	0.0139702	0.049435
TLE2	ENSG00000065717	protein_coding	44.7826	-0.280487	0.208663	-1.34421	0.17888	0.326841
ASB1	ENSG00000065802	protein_coding	1153.6	0.170754	0.074339	2.29696	0.021621	0.0690359
FAM107B	ENSG00000065809	protein_coding	4429.83	0.529699	0.158565	3.34058	0.000836028	0.00546614
ME1	ENSG00000065833	protein_coding	166.796	0.589553	0.318741	1.84963	0.0643666	0.155505
TBC1D1	ENSG00000065882	protein_coding	4058.42	0.37457	0.0979639	3.82355	0.000131545	0.00119988
CDK13	ENSG00000065883	protein_coding	3664.44	-0.0937313	0.0431897	-2.17022	0.0299901	0.0882434
MTHFD2	ENSG00000065911	protein_coding	2115.72	-0.341259	0.096839	-3.52398	0.000425119	0.00314635
SLC9A7	ENSG00000065923	protein_coding	2990.49	0.0280801	0.163389	0.17186	0.863547	0.922256
FOXJ2	ENSG00000065970	protein_coding	1828.02	0.0279189	0.061546	0.453626	0.650098	0.776754
YBX1	ENSG00000065978	protein_coding	13861.7	-0.0947318	0.0783612	-1.20891	0.226697	0.38543
PDE4A	ENSG00000065989	protein_coding	431.556	1.31588	0.240652	5.46799	4.55163e-08	1.32317e-06
PPP2R5A	ENSG00000066027	protein_coding	2732.91	0.221046	0.0665991	3.31906	0.000903222	0.0058027
CTNNA2	ENSG00000066032	protein_coding	1.95707	-1.01069	0.38631	-2.61627	0.00888957	0.034846
ELAVL1	ENSG00000066044	protein_coding	3047.61	-0.253526	0.045706	-5.54689	2.90802e-08	8.98379e-07
TIE1	ENSG00000066056	protein_coding	707.313	-0.208654	0.216274	-0.964767	0.334661	0.503737
DIP2B	ENSG00000066084	protein_coding	4266.07	-0.04254	0.0639481	-0.665226	0.505906	0.663033
SMARCD1	ENSG00000066117	protein_coding	2998.05	-0.117261	0.0587723	-1.99518	0.0460232	0.121345
KDM4A	ENSG00000066135	protein_coding	2658.4	-0.0270572	0.0599507	-0.451323	0.651757	0.777859
NFYC	ENSG00000066136	protein_coding	2263.92	0.14492	0.0448514	3.23111	0.00123312	0.00741865
ZMYND12	ENSG00000066185	protein_coding	55.1266	-0.301041	0.143621	-2.09608	0.036075	0.101308
SLC9A3	ENSG00000066230	protein_coding	123.976	-0.630976	0.208908	-3.02036	0.00252474	0.0130946
NGEF	ENSG00000066248	protein_coding	13.6115	-0.993471	0.176276	-5.6359	1.74149e-08	5.75339e-07
ASPM	ENSG00000066279	protein_coding	2064.83	-0.214961	0.16711	-1.28634	0.198324	0.351414
CD84	ENSG00000066294	protein_coding	7057.46	0.158643	0.145844	1.08776	0.276702	0.442681
ELOVL1	ENSG00000066322	protein_coding	1933.43	0.191613	0.0882756	2.17062	0.0299598	0.0881815
SPI1	ENSG00000066336	protein_coding	5963.13	0.926812	0.124642	7.43582	1.03925e-13	1.00091e-11
ZNRD1	ENSG00000066379	protein_coding	426.865	-0.165794	0.0991301	-1.67249	0.0944277	0.206549
MPPED2	ENSG00000066382	protein_coding	14.1639	-0.581213	0.366525	-1.58574	0.112798	0.235422
CLDN18	ENSG00000066405	protein_coding	11.4591	0.219694	0.277015	0.793075	0.427734	0.594805
ZBTB11	ENSG00000066422	protein_coding	2284.89	-0.171904	0.0643563	-2.67113	0.00755967	0.0307884
ATXN3	ENSG00000066427	protein_coding	3167.54	-0.171743	0.0559678	-3.0686	0.00215064	0.01151
GOLGA5	ENSG00000066455	protein_coding	1057.57	0.0688491	0.0561812	1.22548	0.220393	0.378335
FGFR2	ENSG00000066468	protein_coding	23.0626	1.38526	0.332324	4.16841	3.06729e-05	0.000359689
LRRC40	ENSG00000066557	protein_coding	838.802	-0.174937	0.0617515	-2.83292	0.00461252	0.0209954
ISOC1	ENSG00000066583	protein_coding	551.719	-0.163193	0.0821546	-1.98641	0.0469876	0.123272
EML1	ENSG00000066629	protein_coding	10.764	-0.0968097	0.224453	-0.431314	0.66624	0.789379
TRMT11	ENSG00000066651	protein_coding	416.059	-0.222185	0.0620763	-3.57922	0.000344618	0.002641
THUMPD1	ENSG00000066654	protein_coding	2595.67	-0.396555	0.0934924	-4.24157	2.21959e-05	0.000273683
MSANTD3	ENSG00000066697	protein_coding	340.734	-0.417584	0.0882532	-4.73166	2.22695e-06	3.90659e-05
KIF26A	ENSG00000066735	protein_coding	198.389	-1.29774	0.315611	-4.11183	3.92531e-05	0.000444538
ATG2B	ENSG00000066739	protein_coding	3490.38	-0.193608	0.0674015	-2.87246	0.00407286	0.0190443
ARFGEF1	ENSG00000066777	protein_coding	5885.05	-0.329061	0.0755718	-4.35429	1.335e-05	0.00017744
ACSM2B	ENSG00000066813	protein_coding	2.43488	-0.482927	0.190615	-2.53352	0.0112923	0.0420477
ZFAT	ENSG00000066827	protein_coding	670.937	0.134434	0.0910844	1.47593	0.139964	0.274981
MTFR1	ENSG00000066855	protein_coding	1031.74	-0.311976	0.0800131	-3.89906	9.65662e-05	0.000934916
STAG3	ENSG00000066923	protein_coding	541.984	-0.331221	0.106875	-3.09914	0.00194081	0.0106127
FECH	ENSG00000066926	protein_coding	1585.52	-0.395386	0.133627	-2.95888	0.00308758	0.0153541
MYO9A	ENSG00000066933	protein_coding	3091.26	-0.350426	0.064727	-5.41392	6.16606e-08	1.74664e-06
DDX3Y	ENSG00000067048	protein_coding	3580.58	0.024917	0.501238	0.0497109	0.960353	0.977811
PFKP	ENSG00000067057	protein_coding	3730.03	0.281027	0.122032	2.3029	0.0212845	0.0682519
IDI1	ENSG00000067064	protein_coding	1587.33	0.00337771	0.0903864	0.0373696	0.97019	0.98356
SP100	ENSG00000067066	protein_coding	5035.06	0.249281	0.0695146	3.58602	0.000335769	0.00258616
KLF6	ENSG00000067082	protein_coding	20648.6	0.150834	0.11937	1.26358	0.206379	0.361306
PLPP1	ENSG00000067113	protein_coding	215.525	-0.227704	0.133942	-1.70002	0.0891271	0.197895
NEO1	ENSG00000067141	protein_coding	276.474	-0.806134	0.281014	-2.86866	0.00412209	0.0192273
TRAM1	ENSG00000067167	protein_coding	5751.72	-0.135321	0.0763384	-1.77265	0.0762865	0.176229
PHKA1	ENSG00000067177	protein_coding	165.703	-0.469052	0.326936	-1.43469	0.151376	0.290837
TNFRSF1A	ENSG00000067182	protein_coding	4990.25	0.151434	0.0762213	1.98676	0.0469487	0.123214
CACNB1	ENSG00000067191	protein_coding	575.656	1.05032	0.16509	6.36212	1.98984e-10	1.03713e-08
EVI5	ENSG00000067208	protein_coding	821.135	0.845602	0.139297	6.0705	1.27516e-09	5.56584e-08
STOML1	ENSG00000067221	protein_coding	209.68	-0.0524337	0.087303	-0.600595	0.54811	0.697825
PKM	ENSG00000067225	protein_coding	21361.5	0.7376	0.118642	6.217	5.06736e-10	2.42832e-08
DHX29	ENSG00000067248	protein_coding	1531.01	0.0514271	0.0581417	0.884513	0.37642	0.5455
DNTTIP2	ENSG00000067334	protein_coding	2025.5	-0.122203	0.0717514	-1.70314	0.0885413	0.19692
METTL22	ENSG00000067365	protein_coding	1230.62	0.138093	0.0574425	2.40401	0.0162162	0.0553999
TP53BP1	ENSG00000067369	protein_coding	3031.44	-0.361109	0.0786423	-4.59179	4.39452e-06	6.98316e-05
TRO	ENSG00000067445	protein_coding	257.294	0.308282	0.34037	0.905727	0.365081	0.534949
RRP15	ENSG00000067533	protein_coding	783.155	-0.429426	0.0723215	-5.93773	2.88988e-09	1.14313e-07
RHOA	ENSG00000067560	protein_coding	17047.1	0.331691	0.0755007	4.39321	1.11688e-05	0.000152955
DHX8	ENSG00000067596	protein_coding	2687.32	0.201077	0.0509342	3.94779	7.88765e-05	0.000791072
PMS2P4	ENSG00000067601	transcribed_unprocessed_pseudogene	81.4585	-0.294076	0.0705004	-4.17127	3.02905e-05	0.000356147
PRKCZ	ENSG00000067606	protein_coding	206.906	0.27792	0.211081	1.31665	0.187957	0.338621
ZFY	ENSG00000067646	protein_coding	564.578	-0.208516	0.523863	-0.398036	0.690604	0.806682
IARS2	ENSG00000067704	protein_coding	2478.89	0.0850361	0.0679207	1.25199	0.210573	0.366232
SYT1	ENSG00000067715	protein_coding	31.2387	0.5582	0.439481	1.27013	0.204037	0.358474
NAV3	ENSG00000067798	protein_coding	156.196	-0.131847	0.369325	-0.356995	0.721095	0.828902
IDH3G	ENSG00000067829	protein_coding	1741.39	0.507708	0.096337	5.27013	1.36329e-07	3.50946e-06
ROGDI	ENSG00000067836	protein_coding	1164.69	0.131127	0.196459	0.66745	0.504485	0.662052
PDZD4	ENSG00000067840	protein_coding	104.073	0.221059	0.222708	0.992598	0.320906	0.490077
ATP2B3	ENSG00000067842	protein_coding	14.3924	-0.628544	0.2216	-2.83639	0.00456264	0.020824
ROCK1	ENSG00000067900	protein_coding	6126.14	0.0981991	0.0646268	1.51948	0.128642	0.259216
CBFB	ENSG00000067955	protein_coding	2658.67	-0.169386	0.0723022	-2.34274	0.0191425	0.0629086
PDK3	ENSG00000067992	protein_coding	600.523	0.103844	0.079203	1.31111	0.18982	0.340833
HYAL2	ENSG00000068001	protein_coding	353.937	-0.0936625	0.13099	-0.715038	0.474586	0.636226
HDAC4	ENSG00000068024	protein_coding	2550.97	0.348511	0.123494	2.8221	0.00477109	0.0215511
RASSF1	ENSG00000068028	protein_coding	4101.66	0.0709334	0.0810719	0.874945	0.381604	0.550403
FGFR3	ENSG00000068078	protein_coding	154.212	-0.633167	0.239833	-2.64003	0.00828976	0.0330093
IFI35	ENSG00000068079	protein_coding	662.023	0.622897	0.0970407	6.41892	1.37243e-10	7.37006e-09
HEATR6	ENSG00000068097	protein_coding	1023.55	0.118299	0.0726179	1.62906	0.1033	0.220617
COASY	ENSG00000068120	protein_coding	1683.85	0.225911	0.0782493	2.88707	0.00388847	0.0183521
PLEKHH3	ENSG00000068137	protein_coding	192.481	0.551513	0.212344	2.59727	0.00939688	0.0364056
MEF2A	ENSG00000068305	protein_coding	3323.84	0.108257	0.109258	0.99084	0.321764	0.490929
OTUD5	ENSG00000068308	protein_coding	2510.94	0.217321	0.0717999	3.02676	0.00247193	0.0128719
TFE3	ENSG00000068323	protein_coding	2241.48	0.687114	0.0946501	7.25951	3.88486e-13	3.36155e-11
TBC1D25	ENSG00000068354	protein_coding	907.49	0.000414161	0.0839165	0.00493539	0.996062	0.998361
ACSL4	ENSG00000068366	protein_coding	3392.83	0.15171	0.0984535	1.54093	0.123333	0.251393
INPP5A	ENSG00000068383	protein_coding	665.676	0.0218494	0.0897227	0.243522	0.807601	0.886567
GPKOW	ENSG00000068394	protein_coding	463.501	0.100683	0.0598592	1.682	0.0925685	0.203648
GRIPAP1	ENSG00000068400	protein_coding	3367.38	0.231048	0.0560992	4.11856	3.81241e-05	0.000433747
FTSJ1	ENSG00000068438	protein_coding	963.311	0.0915106	0.0689334	1.32752	0.184336	0.333895
PRR11	ENSG00000068489	protein_coding	1518.54	0.0675463	0.125551	0.537997	0.590579	0.731633
REEP1	ENSG00000068615	protein_coding	11.1802	-0.182974	0.199817	-0.915707	0.359821	0.529528
ATP11A	ENSG00000068650	protein_coding	7332.69	0.134303	0.107593	1.24825	0.21194	0.367916
POLR1A	ENSG00000068654	protein_coding	3356.14	-0.184581	0.0679707	-2.71559	0.00661571	0.0277705
LAPTM4A	ENSG00000068697	protein_coding	4484.56	-0.0552114	0.0843948	-0.654204	0.51298	0.669094
TTC7A	ENSG00000068724	protein_coding	5495.09	0.201111	0.0947178	2.12326	0.0337319	0.0963461
IP6K2	ENSG00000068745	protein_coding	2233.36	-0.207975	0.0682394	-3.04772	0.00230581	0.0121569
STON1-GTF2A1L	ENSG00000068781	protein_coding	4.27106	-0.635868	0.370357	-1.71691	0.0859962	0.192691
SRBD1	ENSG00000068784	protein_coding	1209.77	-0.140786	0.0692402	-2.0333	0.0420224	0.113665
KIF2A	ENSG00000068796	protein_coding	2568.98	-0.263774	0.0801652	-3.29038	0.00100053	0.00629372
RASGRP2	ENSG00000068831	protein_coding	8538.86	0.127352	0.108934	1.16907	0.242374	0.404273
PSME4	ENSG00000068878	protein_coding	4318.07	-0.135162	0.0692842	-1.95083	0.0510768	0.13118
IFT80	ENSG00000068885	protein_coding	909.81	-0.0591104	0.109172	-0.541442	0.588203	0.729756
SIRT2	ENSG00000068903	protein_coding	1675.05	0.373872	0.0825389	4.52965	5.90825e-06	8.97952e-05
ERLEC1	ENSG00000068912	protein_coding	1258.49	-0.106123	0.0559117	-1.89804	0.0576906	0.143588
PPP2R5B	ENSG00000068971	protein_coding	424.502	0.351325	0.11421	3.07615	0.00209695	0.0112813
PYGM	ENSG00000068976	protein_coding	194.396	-0.131657	0.125635	-1.04793	0.294671	0.462117
PAGE1	ENSG00000068985	protein_coding	0.306582	0.0778561	0.577621	0.134788	0.89278
PITX1	ENSG00000069011	protein_coding	5.99336	-0.590931	0.255722	-2.31083	0.0208424	0.0671839
TRPC7	ENSG00000069018	protein_coding	0.343289	-0.0379262	0.471371	-0.0804593	0.935872	0.964349
MAST4	ENSG00000069020	protein_coding	2161.71	-0.340835	0.163912	-2.07937	0.0375831	0.10449
ADGRF5	ENSG00000069122	protein_coding	23.3014	-0.502767	0.385479	-1.30427	0.192143	0.343634
SDK2	ENSG00000069188	protein_coding	1507.89	-0.0355108	0.363599	-0.0976647	0.922199	0.957761
ADAM7	ENSG00000069206	protein_coding	0.730697	-1.1469	0.429104	-2.67279	0.00752233	0.0306618
NUP133	ENSG00000069248	protein_coding	2048.63	-0.146916	0.0498403	-2.94773	0.00320113	0.0157963
NUCKS1	ENSG00000069275	protein_coding	8198.99	-0.334149	0.0736285	-4.53832	5.67045e-06	8.68064e-05
VPS35	ENSG00000069329	protein_coding	4972.13	0.023695	0.0641604	0.369309	0.711897	0.82165
DNAJA2	ENSG00000069345	protein_coding	1681.59	0.0618696	0.0625157	0.989665	0.322338	0.4915
BCL3	ENSG00000069399	protein_coding	1454.24	0.827379	0.181498	4.55861	5.14944e-06	7.99199e-05
KCNAB2	ENSG00000069424	protein_coding	14074.6	0.355311	0.100551	3.53363	0.00040989	0.00304995
ABCC9	ENSG00000069431	protein_coding	33.3776	-0.680383	0.349906	-1.94447	0.0518386	0.132706
GAL	ENSG00000069482	protein_coding	8.02516	-1.21608	0.314286	-3.86934	0.00010913	0.00103285
CLEC2D	ENSG00000069493	protein_coding	2012.85	0.313436	0.113317	2.76601	0.00567475	0.0246213
FUNDC1	ENSG00000069509	protein_coding	245.322	-0.177354	0.0758266	-2.33894	0.0193385	0.0633309
MAOB	ENSG00000069535	protein_coding	7.08091	0.00103365	0.313242	0.00329985	0.997367	0.999149
RORA	ENSG00000069667	protein_coding	801.81	-0.0720156	0.169348	-0.425251	0.670653	0.792171
DRD4	ENSG00000069696	protein_coding	125.007	0.0950159	0.153375	0.619501	0.535586	0.687893
TGFBR3	ENSG00000069702	protein_coding	259.861	0.172224	0.203642	0.845719	0.39771	0.566205
PLA2G10	ENSG00000069764	protein_coding	32.7921	0.0135602	0.108703	0.124745	0.900725	0.944203
HES2	ENSG00000069812	protein_coding	6.86163	-0.533098	0.242306	-2.2001	0.0277998	0.0833918
ATP1B3	ENSG00000069849	protein_coding	2798.18	0.227097	0.0868015	2.61628	0.0088894	0.034846
NEDD4	ENSG00000069869	protein_coding	1536.36	-0.425582	0.135893	-3.13174	0.00173773	0.00972668
PIGB	ENSG00000069943	protein_coding	992.087	-0.00440211	0.0626619	-0.0702518	0.943993	0.968409
MAPK6	ENSG00000069956	protein_coding	1715.54	-0.159971	0.066455	-2.40721	0.0160749	0.0550343
GNB5	ENSG00000069966	protein_coding	945.55	-0.372975	0.140906	-2.64697	0.00812158	0.0325058
RAB27A	ENSG00000069974	protein_coding	3962.24	0.0121146	0.133915	0.0904652	0.927918	0.960441
HDHD5	ENSG00000069998	protein_coding	1226.25	0.331673	0.121801	2.72308	0.0064677	0.027279
UFD1	ENSG00000070010	protein_coding	1684.26	0.126843	0.0561452	2.2592	0.0238707	0.0743167
LRP6	ENSG00000070018	protein_coding	535.281	0.359294	0.365715	0.982442	0.325882	0.49486
GUCY2C	ENSG00000070019	protein_coding	25.2602	2.21621	0.336329	6.58943	4.41531e-11	2.56036e-09
SCT	ENSG00000070031	protein_coding	20.9265	0.402902	0.204405	1.9711	0.0487122	0.126672
PHRF1	ENSG00000070047	protein_coding	2522.82	0.110862	0.0637812	1.73816	0.0821824	0.186389
ELP1	ENSG00000070061	protein_coding	2180.26	-0.0226477	0.0519359	-0.436071	0.662785	0.786484
NUCB2	ENSG00000070081	protein_coding	11134.2	-0.942322	0.121846	-7.73368	1.0448e-14	1.23764e-12
PFN2	ENSG00000070087	protein_coding	50.544	0.209224	0.157064	1.33209	0.182829	0.33193
PTPN3	ENSG00000070159	protein_coding	7.53774	-0.183286	0.273671	-0.66973	0.50303	0.660706
SPTB	ENSG00000070182	protein_coding	1044.55	-0.715276	0.306483	-2.33382	0.0196051	0.0639833
DAPP1	ENSG00000070190	protein_coding	1567.37	0.872923	0.134562	6.48715	8.7474e-11	4.8442e-09
FGF10	ENSG00000070193	protein_coding	35.2671	0.562577	0.906031	0.620925	0.534649	0.687085
SLC44A1	ENSG00000070214	protein_coding	5688.23	0.176643	0.220874	0.799746	0.423858	0.59104
TMEM260	ENSG00000070269	protein_coding	1138.36	-0.144848	0.0554443	-2.61249	0.00898841	0.0351452
SMG6	ENSG00000070366	protein_coding	1698.01	-0.0726492	0.057313	-1.26759	0.204946	0.359464
EXOC5	ENSG00000070367	protein_coding	2638.82	-0.166781	0.0620651	-2.6872	0.0072054	0.0296178
CLTCL1	ENSG00000070371	protein_coding	1809.92	-0.349603	0.3261	-1.07207	0.283687	0.450537
FGF22	ENSG00000070388	protein_coding	8.91986	-0.155139	0.148108	-1.04747	0.294883	0.462302
FSTL3	ENSG00000070404	protein_coding	762.226	-0.230213	0.138296	-1.66464	0.0959849	0.20899
DGCR2	ENSG00000070413	protein_coding	2760.87	0.168735	0.0677276	2.49137	0.0127252	0.0460779
RNF126	ENSG00000070423	protein_coding	1243.29	0.373459	0.110643	3.37535	0.000737208	0.00492617
MNT	ENSG00000070444	protein_coding	2020.39	0.286411	0.0746974	3.83429	0.00012593	0.00116116
ZXDC	ENSG00000070476	protein_coding	2809.58	0.147099	0.061808	2.37994	0.0173155	0.0582449
JMJD6	ENSG00000070495	protein_coding	1047.46	0.205093	0.0986566	2.07886	0.0376305	0.104569
POLB	ENSG00000070501	protein_coding	725.395	0.0188603	0.0699073	0.26979	0.787322	0.873022
ST6GALNAC1	ENSG00000070526	protein_coding	40.5715	-0.407804	0.278123	-1.46627	0.142574	0.278688
WIPI1	ENSG00000070540	protein_coding	361.727	0.35621	0.159496	2.23334	0.0255265	0.0782144
FRMPD1	ENSG00000070601	protein_coding	4.12708	-0.134892	0.253534	-0.532047	0.594693	0.734956
GBA2	ENSG00000070610	protein_coding	2544.71	0.44966	0.068162	6.59694	4.19744e-11	2.44683e-09
NDST1	ENSG00000070614	protein_coding	3267.11	0.2563	0.113031	2.26753	0.0233581	0.0731124
ASNS	ENSG00000070669	protein_coding	890.651	-0.565673	0.142261	-3.9763	6.99963e-05	0.000719668
AP3M2	ENSG00000070718	protein_coding	626.139	-0.259832	0.0837832	-3.10125	0.00192709	0.0105481
CNGB1	ENSG00000070729	protein_coding	4.78703	0.149497	0.217622	0.686957	0.49211	0.651498
ST6GALNAC2	ENSG00000070731	protein_coding	150.536	0.505121	0.16523	3.05708	0.00223504	0.0118822
CHAT	ENSG00000070748	protein_coding	1.93314	-2.19091	0.459209	-4.77104	1.83275e-06	3.32908e-05
PABPC1	ENSG00000070756	protein_coding	84619.8	0.0194475	0.0670151	0.290195	0.771667	0.863268
TESK2	ENSG00000070759	protein_coding	602.117	0.147254	0.0653783	2.25234	0.0243008	0.07535
CFAP20	ENSG00000070761	protein_coding	952.488	-0.191783	0.0923063	-2.07768	0.0377389	0.104798
CSNK2A2	ENSG00000070770	protein_coding	3125.13	-0.0984666	0.0418048	-2.35539	0.0185034	0.0612673
PTPN21	ENSG00000070778	protein_coding	30.9752	-0.219846	0.157926	-1.39208	0.163898	0.307494
EIF2B3	ENSG00000070785	protein_coding	702.817	-0.042461	0.0550133	-0.771831	0.440215	0.605866
CAMK2A	ENSG00000070808	protein_coding	8.1234	0.894268	0.292282	3.0596	0.0022163	0.0118001
TCOF1	ENSG00000070814	protein_coding	3242.31	0.0657251	0.0737404	0.891303	0.372767	0.541915
CDC42	ENSG00000070831	protein_coding	7206.34	0.196623	0.0792783	2.48017	0.013132	0.0471695
OSBPL3	ENSG00000070882	protein_coding	2190.26	-0.0045496	0.143175	-0.0317766	0.97465	0.986
EPHA8	ENSG00000070886	protein_coding	1.43334	0.057677	0.259829	0.22198	0.824329	0.897458
SLC12A3	ENSG00000070915	protein_coding	23.0926	1.19461	0.307319	3.88719	0.000101412	0.000973955
RAD18	ENSG00000070950	protein_coding	1111.02	-0.268151	0.0610697	-4.3909	1.12884e-05	0.000154213
ATP2B1	ENSG00000070961	protein_coding	3510.42	0.283045	0.114616	2.4695	0.0135303	0.0482404
TRPM5	ENSG00000070985	protein_coding	10.9883	-0.209042	0.230037	-0.908732	0.363492	0.533379
NCK2	ENSG00000071051	protein_coding	1374.38	-0.0482411	0.0783967	-0.615346	0.538326	0.689889
MAP4K4	ENSG00000071054	protein_coding	5576.65	-0.139843	0.101053	-1.38387	0.166399	0.310647
MGAT4A	ENSG00000071073	protein_coding	1473.25	-0.195905	0.130065	-1.50621	0.132014	0.263688
RPL31	ENSG00000071082	protein_coding	15957.7	-0.139845	0.0879162	-1.59066	0.111686	0.233636
WDR1	ENSG00000071127	protein_coding	8220.51	0.372631	0.0712319	5.23123	1.68383e-07	4.20698e-06
SNX13	ENSG00000071189	protein_coding	1729.01	0.211383	0.091148	2.31911	0.0203888	0.0660153
MS4A12	ENSG00000071203	protein_coding	0.217748	-0.263277	0.61492	-0.428148	0.668543
ARHGAP10	ENSG00000071205	protein_coding	520.602	-0.815182	0.187638	-4.34443	1.39637e-05	0.000184446
RPS6KA2	ENSG00000071242	protein_coding	803.92	-0.235507	0.24124	-0.976235	0.328948	0.49798
ING3	ENSG00000071243	protein_coding	621.728	-0.137534	0.0825797	-1.66548	0.0958177	0.208733
VASH1	ENSG00000071246	protein_coding	668.554	0.646204	0.135292	4.77637	1.78487e-06	3.25412e-05
LMCD1	ENSG00000071282	protein_coding	31.1133	0.140943	0.252256	0.558728	0.576347	0.720754
BUD23	ENSG00000071462	protein_coding	1449.47	-0.0623823	0.0780443	-0.799318	0.424106	0.591319
SEL1L	ENSG00000071537	protein_coding	4251.88	0.000867231	0.0703595	0.0123257	0.990166	0.995468
TRIP13	ENSG00000071539	protein_coding	452.747	-0.184945	0.112282	-1.64714	0.0995294	0.214739
ATP6AP1	ENSG00000071553	protein_coding	4946.42	0.272929	0.0984675	2.77177	0.00557526	0.0242962
TCF3	ENSG00000071564	protein_coding	3949.64	-0.319837	0.107513	-2.97486	0.00293122	0.014747
TRIB2	ENSG00000071575	protein_coding	457.989	-0.731213	0.221665	-3.29873	0.000971239	0.00613996
DAZAP1	ENSG00000071626	protein_coding	5569.04	-0.00221874	0.0581438	-0.0381596	0.96956	0.983189
MBD3	ENSG00000071655	protein_coding	1929.56	0.044376	0.0865065	0.512979	0.607966	0.744982
PRLH	ENSG00000071677	protein_coding	0.0262204	-0.0643463	2.90447	-0.0221542	0.982325
HLTF	ENSG00000071794	protein_coding	1626.71	-0.494089	0.092558	-5.33816	9.38956e-08	2.53187e-06
FAM50A	ENSG00000071859	protein_coding	834.037	0.548113	0.127048	4.31422	1.60171e-05	0.000207669
FAM3A	ENSG00000071889	protein_coding	831.63	0.118746	0.0946374	1.25475	0.20957	0.365032
CPSF1	ENSG00000071894	protein_coding	6393.42	0.180045	0.111041	1.62142	0.104927	0.223167
MYO3B	ENSG00000071909	protein_coding	9.3023	0.267423	0.259887	1.029	0.30348	0.471777
CYBRD1	ENSG00000071967	protein_coding	3187.05	0.0647045	0.103191	0.627038	0.530634	0.683371
CDH19	ENSG00000071991	protein_coding	0.288249	0.116886	0.581219	0.201104	0.840617
PDCD2	ENSG00000071994	protein_coding	1829.93	-0.131156	0.0450277	-2.91278	0.00358226	0.0171963
SLC6A15	ENSG00000072041	protein_coding	0.49647	-0.660302	0.444272	-1.48626	0.137211	0.271136
RDH11	ENSG00000072042	protein_coding	1397.98	-0.0489951	0.0645081	-0.759519	0.447542	0.612136
PRKACA	ENSG00000072062	protein_coding	1911.65	0.817317	0.103164	7.92253	2.32719e-15	3.13084e-13
ADGRL1	ENSG00000072071	protein_coding	1512.65	0.398772	0.143969	2.76984	0.00560845	0.0244079
SPP2	ENSG00000072080	protein_coding	0.239843	0.156876	0.624357	0.25126	0.801613
ACTN1	ENSG00000072110	protein_coding	7300.14	-0.172871	0.125147	-1.38134	0.167174	0.311553
ZFYVE26	ENSG00000072121	protein_coding	2785.16	0.0742435	0.0543945	1.36491	0.172282	0.318145
RPS6KA6	ENSG00000072133	protein_coding	4.49642	1.06038	0.31604	3.35519	0.000793097	0.00523489
EPN2	ENSG00000072134	protein_coding	176.942	0.346151	0.23942	1.44579	0.148236	0.286695
PTPN18	ENSG00000072135	protein_coding	5237.55	0.781818	0.107974	7.24078	4.46096e-13	3.77164e-11
LIMS2	ENSG00000072163	protein_coding	64.2812	-0.444031	0.209468	-2.1198	0.0340225	0.096933
ASIC4	ENSG00000072182	protein_coding	8.65148	-0.284986	0.258452	-1.10267	0.270173	0.435586
SPEG	ENSG00000072195	protein_coding	69.2608	-0.457471	0.246709	-1.85429	0.0636971	0.154419
LNX1	ENSG00000072201	protein_coding	143.186	-0.56365	0.0937737	-6.01075	1.8467e-09	7.64619e-08
ALDH3A2	ENSG00000072210	protein_coding	1194.38	0.650444	0.153902	4.22636	2.37504e-05	0.000289894
TFRC	ENSG00000072274	protein_coding	10638.1	-0.663738	0.144499	-4.59336	4.36161e-06	6.94082e-05
SREBF1	ENSG00000072310	protein_coding	2391.07	0.566728	0.123254	4.59805	4.26466e-06	6.80855e-05
TRPC5	ENSG00000072315	protein_coding	34.2217	-0.207785	0.185107	-1.12251	0.261644	0.425841
AFF4	ENSG00000072364	protein_coding	4393.4	-0.0541437	0.0629614	-0.859951	0.389816	0.558414
UBE2D1	ENSG00000072401	protein_coding	1073.26	0.774236	0.132124	5.8599	4.63149e-09	1.75225e-07
MPP5	ENSG00000072415	protein_coding	1003.13	-0.168216	0.0599991	-2.80365	0.00505283	0.0225275
RHOBTB1	ENSG00000072422	protein_coding	469.168	-0.778441	0.209424	-3.71707	0.00020155	0.0017142
SMC1A	ENSG00000072501	protein_coding	7137.09	0.0205803	0.075047	0.274231	0.783907	0.870783
HSD17B10	ENSG00000072506	protein_coding	746.724	0.221342	0.0976027	2.26778	0.0233424	0.0730866
MARK2	ENSG00000072518	protein_coding	3108.86	0.32709	0.0675584	4.84159	1.28805e-06	2.46711e-05
HMMR	ENSG00000072571	protein_coding	715.135	-0.426783	0.162121	-2.6325	0.0084759	0.0335694
CHFR	ENSG00000072609	protein_coding	2625.73	0.353243	0.0783518	4.50843	6.531e-06	9.75204e-05
TRHDE	ENSG00000072657	protein_coding	4.08624	-0.297213	0.382013	-0.778019	0.436558	0.602762
P4HA2	ENSG00000072682	protein_coding	96.6335	0.0212859	0.162983	0.130602	0.89609	0.94117
FCGR2B	ENSG00000072694	protein_coding	257.422	1.36704	0.231453	5.90632	3.49833e-09	1.34888e-07
NFATC3	ENSG00000072736	protein_coding	4253.18	-0.092078	0.0581049	-1.58469	0.113038	0.235811
TRNT1	ENSG00000072756	protein_coding	1190.95	-0.421786	0.0645939	-6.52981	6.58518e-11	3.70232e-09
ACADVL	ENSG00000072778	protein_coding	8360.71	0.278598	0.102962	2.70582	0.00681365	0.0284028
STK10	ENSG00000072786	protein_coding	7844.54	0.468113	0.0852155	5.49328	3.94528e-08	1.16944e-06
FBXW11	ENSG00000072803	protein_coding	1882.73	0.0625548	0.0478441	1.30747	0.191052	0.342278
ACAP1	ENSG00000072818	protein_coding	4626.02	0.158473	0.102651	1.5438	0.122637	0.250343
CRMP1	ENSG00000072832	protein_coding	58.0684	-1.20271	0.374689	-3.20989	0.00132785	0.00785209
EVC	ENSG00000072840	protein_coding	164.795	-1.12001	0.392674	-2.85227	0.00434078	0.0200176
DERL2	ENSG00000072849	protein_coding	1079.37	-0.045416	0.0522555	-0.869115	0.384784	0.553449
SIDT1	ENSG00000072858	protein_coding	549.609	0.173707	0.168612	1.03022	0.302909	0.471101
NDE1	ENSG00000072864	protein_coding	2309.41	-0.0351172	0.0700076	-0.50162	0.615935	0.751129
IRAG1	ENSG00000072952	protein_coding	214.381	1.09226	0.184036	5.93501	2.93831e-09	1.15815e-07
TMEM38A	ENSG00000072954	protein_coding	68.6528	1.11949	0.228022	4.90957	9.12777e-07	1.83729e-05
AP1M1	ENSG00000072958	protein_coding	3291.28	0.202083	0.0742246	2.72259	0.00647723	0.0273062
PVR	ENSG00000073008	protein_coding	758.218	-0.140218	0.191446	-0.732415	0.463916	0.627204
XRCC1	ENSG00000073050	protein_coding	1068.3	-0.0374931	0.0639586	-0.58621	0.557735	0.705618
SCARB1	ENSG00000073060	protein_coding	2872.94	0.0445048	0.091597	0.485876	0.627055	0.759442
CYP2W1	ENSG00000073067	protein_coding	23.5751	-0.807566	0.227789	-3.54524	0.000392254	0.0029393
MCM2	ENSG00000073111	protein_coding	3671.58	-0.163398	0.122881	-1.32973	0.183609	0.332886
MOV10L1	ENSG00000073146	protein_coding	7.63843	-0.758572	0.22665	-3.34688	0.000817252	0.00536354
PANX2	ENSG00000073150	protein_coding	213.968	0.430782	0.226884	1.89869	0.0576048	0.143439
SELENOO	ENSG00000073169	protein_coding	1220.83	0.340729	0.0976255	3.49017	0.000482715	0.00349211
TP63	ENSG00000073282	protein_coding	58.5891	0.352381	0.345613	1.01958	0.307926	0.476027
ALPK1	ENSG00000073331	protein_coding	2385.99	0.0679564	0.0694905	0.977924	0.328112	0.497065
LLGL2	ENSG00000073350	protein_coding	636.819	-0.00825521	0.128415	-0.0642854	0.948743	0.971034
PDE8A	ENSG00000073417	protein_coding	1116.81	0.0750942	0.101972	0.736421	0.461475	0.624819
CLCN4	ENSG00000073464	protein_coding	127.135	-0.634232	0.277167	-2.28826	0.0221222	0.0702465
NLE1	ENSG00000073536	protein_coding	783.772	-0.192206	0.0891782	-2.1553	0.0311383	0.090721
SDHA	ENSG00000073578	protein_coding	2163.26	0.316897	0.0792802	3.99718	6.4101e-05	0.000669621
SMARCE1	ENSG00000073584	protein_coding	2259.2	-0.209211	0.057663	-3.62816	0.000285448	0.002279
FNDC8	ENSG00000073598	protein_coding	10.2504	-0.207759	0.145192	-1.43092	0.152453	0.292159
GSDMB	ENSG00000073605	protein_coding	769.828	-0.4042	0.124304	-3.25169	0.0011472	0.00700637
KDM5A	ENSG00000073614	protein_coding	4839.72	0.0897791	0.0513159	1.74954	0.0801978	0.183126
ADAM11	ENSG00000073670	protein_coding	119.898	-0.0173412	0.190003	-0.0912679	0.92728	0.960292
PPP2R3A	ENSG00000073711	protein_coding	156.951	-0.320314	0.134684	-2.37827	0.0173942	0.0584331
FERMT2	ENSG00000073712	protein_coding	40.0759	-0.335086	0.225379	-1.48677	0.137076	0.270881
ABCB11	ENSG00000073734	protein_coding	8.08249	0.0505412	0.354881	0.142417	0.88675	0.935686
DHRS9	ENSG00000073737	protein_coding	597.134	1.50484	0.304907	4.93543	7.9976e-07	1.64493e-05
CD5L	ENSG00000073754	protein_coding	43.0102	-1.19503	0.382567	-3.12373	0.00178574	0.00993517
PTGS2	ENSG00000073756	protein_coding	1378.75	1.07335	0.2461	4.36145	1.29204e-05	0.000172778
IGF2BP2	ENSG00000073792	protein_coding	4528.54	0.164091	0.15532	1.05647	0.290755	0.457828
MAP3K13	ENSG00000073803	protein_coding	686.896	-0.13598	0.100496	-1.35308	0.176029	0.323024
ST6GAL1	ENSG00000073849	protein_coding	4021.83	0.10198	0.0886762	1.15003	0.250132	0.413076
TBX21	ENSG00000073861	protein_coding	137.228	0.245409	0.215117	1.14082	0.253945	0.417489
VDAC1P1	ENSG00000073905	processed_pseudogene	7.60474	-0.447583	0.122531	-3.65282	0.000259371	0.00210572
FRY	ENSG00000073910	protein_coding	4452.9	-0.0571848	0.149468	-0.382589	0.702024	0.815164
PICALM	ENSG00000073921	protein_coding	7502.12	0.294239	0.0862449	3.41167	0.000645667	0.00442733
NSF	ENSG00000073969	protein_coding	1718.65	0.223487	0.0763709	2.92633	0.00342984	0.0166487
GLI2	ENSG00000074047	protein_coding	71.2305	-0.214497	0.458326	-0.468001	0.639784	0.768917
CLASP1	ENSG00000074054	protein_coding	3712.59	-0.111383	0.0462319	-2.40923	0.0159862	0.0547887
MRPS34	ENSG00000074071	protein_coding	968.322	0.227387	0.105119	2.16314	0.0305301	0.0894443
NOTCH3	ENSG00000074181	protein_coding	480.076	-0.172628	0.277578	-0.621909	0.534001	0.686452
CLNS1A	ENSG00000074201	protein_coding	3889.83	-0.259504	0.0591899	-4.38426	1.16379e-05	0.00015811
PPP2R2C	ENSG00000074211	protein_coding	5.78771	-0.279793	0.382043	-0.732358	0.46395	0.627212
TEAD2	ENSG00000074219	protein_coding	49.153	0.0470754	0.147492	0.319173	0.749596	0.848561
EED	ENSG00000074266	protein_coding	886.384	-0.00784815	0.0523667	-0.149869	0.880868	0.9323
CDHR2	ENSG00000074276	protein_coding	57.6516	0.0227387	0.117771	0.193075	0.8469	0.912412
SNCB	ENSG00000074317	protein_coding	0.993516	0.0287739	0.3302	0.0871409	0.93056	0.961862
TSG101	ENSG00000074319	protein_coding	1404.34	0.110948	0.0482282	2.30049	0.0214206	0.0685643
NCBP3	ENSG00000074356	protein_coding	4659.99	0.0632419	0.0737034	0.858058	0.39086	0.559384
ATP2A3	ENSG00000074370	protein_coding	15973.4	-0.0814349	0.119457	-0.68171	0.495422	0.654267
CA12	ENSG00000074410	protein_coding	5.56541	-0.117778	0.244786	-0.481146	0.630413	0.761915
MGLL	ENSG00000074416	protein_coding	2444.48	-0.104671	0.209414	-0.499828	0.617196	0.752105
NTN4	ENSG00000074527	protein_coding	9.77964	-0.125588	0.25756	-0.487607	0.625828	0.758725
BCS1L	ENSG00000074582	protein_coding	812.366	0.0615643	0.0918305	0.670413	0.502595	0.660275
NUAK1	ENSG00000074590	protein_coding	15.3852	0.270815	0.270363	1.00167	0.316501	0.485525
DPP8	ENSG00000074603	protein_coding	2962.92	0.0188293	0.0486915	0.386705	0.698975	0.813055
SLC24A1	ENSG00000074621	protein_coding	1372.82	-0.121904	0.0672369	-1.81305	0.0698248	0.164984
ZNF532	ENSG00000074657	protein_coding	483.2	1.34793	0.274508	4.91036	9.09077e-07	1.83234e-05
SCARF1	ENSG00000074660	protein_coding	1453.91	0.391703	0.153754	2.54759	0.0108469	0.0407384
LMAN1	ENSG00000074695	protein_coding	3940.64	-0.476614	0.07547	-6.31527	2.69685e-10	1.36382e-08
HACD3	ENSG00000074696	protein_coding	2234.23	-0.351723	0.0766261	-4.59013	4.42977e-06	7.02406e-05
IPCEF1	ENSG00000074706	protein_coding	590.196	0.853747	0.202421	4.21768	2.46824e-05	0.000299016
ZZEF1	ENSG00000074755	protein_coding	6338.99	0.209672	0.0613084	3.41996	0.000626298	0.00431589
NOX3	ENSG00000074771	protein_coding	0.701965	-0.339116	0.418887	-0.809565	0.41819	0.585633
ENO1	ENSG00000074800	protein_coding	32669.9	0.388861	0.0960382	4.04902	5.14316e-05	0.000556972
SLC12A1	ENSG00000074803	protein_coding	14.0663	-0.679861	0.221735	-3.0661	0.00216873	0.0115914
MYDGF	ENSG00000074842	protein_coding	1467.43	-0.0468558	0.109801	-0.426735	0.669572	0.791358
ANO8	ENSG00000074855	protein_coding	784.765	0.61481	0.149534	4.11152	3.93068e-05	0.000445
TUBE1	ENSG00000074935	protein_coding	605.426	-0.341979	0.0770445	-4.43872	9.04953e-06	0.000127641
ARHGEF10L	ENSG00000074964	protein_coding	599.361	3.08635	0.295351	10.4497	1.46921e-25	1.12225e-22
TXK	ENSG00000074966	protein_coding	892.993	-0.172681	0.16291	-1.05998	0.289153	0.456225
WSCD2	ENSG00000075035	protein_coding	2.29479	0.0245396	0.277484	0.0884363	0.92953	0.961393
KCNQ2	ENSG00000075043	protein_coding	9.58342	0.432549	0.281118	1.53868	0.123883	0.252153
TACR2	ENSG00000075073	protein_coding	63.1841	0.397532	0.152505	2.60668	0.00914259	0.0355895
ACTR6	ENSG00000075089	protein_coding	570.305	-0.187262	0.05904	-3.17178	0.00151509	0.00871955
TIPIN	ENSG00000075131	protein_coding	357.083	-0.216946	0.0717492	-3.02367	0.00249731	0.0129812
SRI	ENSG00000075142	protein_coding	1368.62	-0.14605	0.0805362	-1.81348	0.0697583	0.164862
EIF4G3	ENSG00000075151	protein_coding	5319.93	-0.0493937	0.0676479	-0.730159	0.465293	0.628443
NUP37	ENSG00000075188	protein_coding	591.256	0.00270022	0.0678616	0.0397902	0.96826	0.982439
SEMA3A	ENSG00000075213	protein_coding	46.6161	0.018465	0.304735	0.0605937	0.951683	0.972535
GTSE1	ENSG00000075218	protein_coding	612.552	-0.0880937	0.148214	-0.59437	0.552265	0.701197
SEMA3C	ENSG00000075223	protein_coding	110.83	0.273841	0.400588	0.683597	0.494229	0.653323
TTC38	ENSG00000075234	protein_coding	1282.96	0.272557	0.120928	2.25388	0.024204	0.0751076
ACAT1	ENSG00000075239	protein_coding	1555.71	-0.0739881	0.0979864	-0.755085	0.450198	0.61449
GRAMD4	ENSG00000075240	protein_coding	2677.43	-0.137945	0.110789	-1.24512	0.213086	0.369462
CELSR1	ENSG00000075275	protein_coding	339.408	-0.00717919	0.224891	-0.0319229	0.974534	0.985981
WNT8B	ENSG00000075290	protein_coding	37.7967	0.0750122	0.127277	0.589363	0.555618	0.704005
ZNF638	ENSG00000075292	protein_coding	6138.73	-0.107918	0.0570594	-1.89133	0.0585799	0.145214
SLC25A40	ENSG00000075303	protein_coding	1718.77	-0.15097	0.0976978	-1.54527	0.12228	0.249855
TIMM21	ENSG00000075336	protein_coding	526.991	-0.196752	0.0656094	-2.99884	0.0027101	0.0138528
ADD2	ENSG00000075340	protein_coding	1121.07	-0.525307	0.309856	-1.69533	0.0900133	0.199293
FGF4	ENSG00000075388	protein_coding	0.427276	0.259698	0.366904	0.707809	0.479064	0.640182
RASAL2	ENSG00000075391	protein_coding	448.958	-0.518204	0.250658	-2.06738	0.0386985	0.106835
VPS9D1	ENSG00000075399	protein_coding	745.155	0.579453	0.103887	5.57772	2.43688e-08	7.72254e-07
ZNF37A	ENSG00000075407	protein_coding	1792.37	-0.286128	0.0694493	-4.11995	3.78953e-05	0.000431588
MARK3	ENSG00000075413	protein_coding	4685.87	-0.00342644	0.0409907	-0.0835907	0.933382	0.963189
SLC25A3	ENSG00000075415	protein_coding	10279.7	0.0763228	0.0663633	1.15008	0.250113	0.413076
FNDC3B	ENSG00000075420	protein_coding	8693.71	-0.76074	0.136334	-5.57999	2.40531e-08	7.64436e-07
FOSL2	ENSG00000075426	protein_coding	11426.7	0.739635	0.150744	4.90656	9.26876e-07	1.85716e-05
CACNG5	ENSG00000075429	protein_coding	0.601139	0.273939	0.496746	0.551466	0.581314	0.724484
CACNG4	ENSG00000075461	protein_coding	30.1263	0.983126	0.33042	2.97538	0.00292623	0.0147252
FRYL	ENSG00000075539	protein_coding	5642.41	-0.11575	0.0616045	-1.87892	0.0602552	0.14805
TMEM131	ENSG00000075568	protein_coding	4839.08	0.0986011	0.0420743	2.3435	0.0191038	0.0628094
FSCN1	ENSG00000075618	protein_coding	2929.47	-0.41751	0.201084	-2.0763	0.0378665	0.105048
ACTB	ENSG00000075624	protein_coding	141820	0.472193	0.102219	4.61941	3.84825e-06	6.23361e-05
MOCOS	ENSG00000075643	protein_coding	21.9864	0.698841	0.299121	2.33632	0.0194746	0.0636506
PLD1	ENSG00000075651	protein_coding	2544.04	-0.533487	0.133707	-3.98998	6.60776e-05	0.000686386
ATP12A	ENSG00000075673	protein_coding	8.42543	-2.09392	0.305509	-6.85388	7.1874e-12	4.90637e-10
WDR62	ENSG00000075702	protein_coding	1256.2	-0.0427457	0.118451	-0.360872	0.718195	0.826653
DLG1	ENSG00000075711	protein_coding	2816.59	-0.189879	0.0464229	-4.0902	4.3101e-05	0.000480379
RAB7A	ENSG00000075785	protein_coding	7055.55	0.179913	0.0650359	2.76637	0.0056685	0.024599
BCAP29	ENSG00000075790	protein_coding	1496.17	-0.032612	0.0801078	-0.407102	0.683933	0.802019
SEC31B	ENSG00000075826	protein_coding	3168.26	0.26825	0.0937851	2.86026	0.00423298	0.0196364
SART3	ENSG00000075856	protein_coding	1833.85	-0.0495953	0.0424471	-1.1684	0.242644	0.404587
ARHGAP15	ENSG00000075884	protein_coding	3003.71	-0.177472	0.0730897	-2.42814	0.0151766	0.052648
TUBA3D	ENSG00000075886	protein_coding	135.576	-0.0600001	0.0902406	-0.66489	0.506121	0.663216
PAX2	ENSG00000075891	protein_coding	2.12922	-0.325388	0.214147	-1.51946	0.128646	0.259216
EXOSC7	ENSG00000075914	protein_coding	622.762	-0.0186379	0.0601383	-0.309916	0.756624	0.853097
KIFAP3	ENSG00000075945	protein_coding	810.517	-0.624147	0.124945	-4.99537	5.87231e-07	1.26108e-05
MKRN2	ENSG00000075975	protein_coding	1294.04	-0.073925	0.0388856	-1.90109	0.0572902	0.142832
MCM6	ENSG00000076003	protein_coding	3271.87	-0.270571	0.102619	-2.63667	0.00837249	0.0332699
REXO2	ENSG00000076043	protein_coding	858.701	-0.420817	0.11526	-3.65102	0.000261198	0.00211939
RBM7	ENSG00000076053	protein_coding	899.089	-0.160887	0.0647421	-2.48504	0.0129536	0.0466989
RBMS2	ENSG00000076067	protein_coding	1679.06	-0.154836	0.114123	-1.35674	0.174863	0.321501
BAZ2A	ENSG00000076108	protein_coding	9713.92	0.138273	0.0549691	2.51546	0.0118876	0.043712
PTPN23	ENSG00000076201	protein_coding	3386.1	0.182138	0.0815665	2.23299	0.0255493	0.0782735
MLH1	ENSG00000076242	protein_coding	1604	-0.0131785	0.0545437	-0.241613	0.80908	0.887478
UNG	ENSG00000076248	protein_coding	1300.01	-0.341591	0.0991144	-3.44643	0.000568038	0.00398824
FMO4	ENSG00000076258	protein_coding	207.009	-0.159905	0.0831522	-1.92304	0.0544755	0.137674
KLHL20	ENSG00000076321	protein_coding	973.827	-0.123223	0.0403393	-3.05466	0.00225312	0.0119516
RGS11	ENSG00000076344	protein_coding	23.7131	-0.103172	0.1912	-0.539602	0.589472	0.730709
SLC46A1	ENSG00000076351	protein_coding	189.421	0.346141	0.142455	2.42983	0.015106	0.052477
PLXNA2	ENSG00000076356	protein_coding	252.265	-0.193007	0.219803	-0.878091	0.379895	0.548778
SPAG5	ENSG00000076382	protein_coding	1653.88	-0.112888	0.110591	-1.02077	0.307363	0.475457
ANKRD13A	ENSG00000076513	protein_coding	3889.83	0.316176	0.0559355	5.65251	1.5812e-08	5.26309e-07
TPD52	ENSG00000076554	protein_coding	407.522	-0.0435997	0.198368	-0.219792	0.826033	0.898651
ACACB	ENSG00000076555	protein_coding	1149.94	-0.417911	0.161911	-2.58111	0.00984833	0.0377203
TRAF4	ENSG00000076604	protein_coding	821.763	0.0555847	0.147355	0.377217	0.706012	0.817642
PAG1	ENSG00000076641	protein_coding	3678.82	0.198135	0.147157	1.34642	0.178168	0.325957
GPATCH1	ENSG00000076650	protein_coding	605.388	-0.03186	0.0413585	-0.770338	0.441099	0.606565
ICAM3	ENSG00000076662	protein_coding	938.555	0.589564	0.138983	4.24198	2.21553e-05	0.000273335
NT5C2	ENSG00000076685	protein_coding	3427.35	-0.0406249	0.0620391	-0.654827	0.512579	0.668752
MCAM	ENSG00000076706	protein_coding	105.461	-0.658123	0.238763	-2.75639	0.00584435	0.0252017
GPC4	ENSG00000076716	protein_coding	25.2465	0.0872704	0.351509	0.248273	0.803923	0.88413
MBNL3	ENSG00000076770	protein_coding	3221.12	-0.236018	0.0904946	-2.60809	0.00910496	0.035468
CAMSAP3	ENSG00000076826	protein_coding	15.8068	0.00188057	0.156505	0.0120161	0.990413	0.995571
RAP1GAP	ENSG00000076864	protein_coding	116.495	-0.296148	0.271557	-1.09055	0.275469	0.441262
XAB2	ENSG00000076924	protein_coding	1857.6	0.247375	0.097224	2.54438	0.0109471	0.0410488
ARHGEF1	ENSG00000076928	protein_coding	11141.2	0.661703	0.0988075	6.69689	2.12899e-11	1.30638e-09
STXBP2	ENSG00000076944	protein_coding	3252.34	0.653814	0.129873	5.03425	4.79716e-07	1.06318e-05
MAP2K7	ENSG00000076984	protein_coding	1581.85	0.0477115	0.0728338	0.655073	0.512421	0.66861
NMRK2	ENSG00000077009	protein_coding	16.0849	-0.79527	0.168672	-4.71489	2.41841e-06	4.20334e-05
DGKD	ENSG00000077044	protein_coding	5647.86	0.164215	0.0977275	1.68033	0.0928929	0.204156
CTTNBP2	ENSG00000077063	protein_coding	5.47099	0.159984	0.353513	0.452555	0.650869	0.777383
ACTL6B	ENSG00000077080	protein_coding	24.5522	-1.13228	0.247373	-4.5772	4.71245e-06	7.39029e-05
RARB	ENSG00000077092	protein_coding	53.066	-0.321686	0.169809	-1.8944	0.0581716	0.144509
TOP2B	ENSG00000077097	protein_coding	11465.6	-0.298108	0.06745	-4.41969	9.88422e-06	0.000137748
TM9SF3	ENSG00000077147	protein_coding	5931.52	-0.0947297	0.0558741	-1.69541	0.0899972	0.199278
NFKB2	ENSG00000077150	protein_coding	1257.64	1.01095	0.150947	6.69739	2.12179e-11	1.30558e-09
UBE2T	ENSG00000077152	protein_coding	361.8	-0.328218	0.113039	-2.90359	0.00368916	0.0175799
PPP1R12B	ENSG00000077157	protein_coding	2699.41	-0.031567	0.0613596	-0.51446	0.606931	0.744081
DNAJC10	ENSG00000077232	protein_coding	4298.85	0.165376	0.07509	2.20237	0.0276389	0.0830104
GTF3C1	ENSG00000077235	protein_coding	3537.9	0.0922704	0.052189	1.768	0.0770602	0.177574
IL4R	ENSG00000077238	protein_coding	2131.57	0.618022	0.137381	4.49858	6.84078e-06	0.000101292
USP33	ENSG00000077254	protein_coding	3240.08	-0.0155815	0.0476033	-0.32732	0.743425	0.844166
PAK3	ENSG00000077264	protein_coding	4.96764	-0.626553	0.248704	-2.51927	0.01176	0.0433662
CAPN6	ENSG00000077274	protein_coding	2.65283	1.40195	0.632618	2.2161	0.0266846	0.0808475
DCX	ENSG00000077279	protein_coding	0.826823	0.658115	0.307606	2.13948	0.0323969	0.0935829
SNRPA	ENSG00000077312	protein_coding	2325.07	-0.0117301	0.0843762	-0.139022	0.889433	0.937288
SPAG6	ENSG00000077327	protein_coding	258.954	0.596619	0.498141	1.19769	0.231038	0.390726
EXOSC5	ENSG00000077348	protein_coding	659.39	-0.164802	0.0913944	-1.80319	0.0713577	0.167674
DYNC1I2	ENSG00000077380	protein_coding	2438.98	-0.0146121	0.0586873	-0.248982	0.803375	0.883805
APBB1IP	ENSG00000077420	protein_coding	5810.88	0.330946	0.075506	4.38304	1.17034e-05	0.000158853
LRCH4	ENSG00000077454	protein_coding	2647.33	0.224596	0.0993399	2.26088	0.0237667	0.0740617
FAM76B	ENSG00000077458	protein_coding	1466.57	-0.0360557	0.052845	-0.682291	0.495055	0.653997
SIRT6	ENSG00000077463	protein_coding	552.491	0.409517	0.103065	3.97339	7.08558e-05	0.00072563
TYR	ENSG00000077498	protein_coding	0.200884	0.120429	0.618015	0.194864	0.845499
POLD3	ENSG00000077514	protein_coding	1259.54	0.103509	0.0776807	1.3325	0.182697	0.33175
ACTN2	ENSG00000077522	protein_coding	5.82934	-0.177968	0.289568	-0.6146	0.538819	0.690241
CAPZB	ENSG00000077549	protein_coding	6821.6	0.401431	0.078826	5.09262	3.53148e-07	8.11911e-06
GPR137B	ENSG00000077585	protein_coding	239.424	0.860832	0.160564	5.36131	8.26185e-08	2.25385e-06
NAALAD2	ENSG00000077616	protein_coding	120.946	-0.236527	0.127157	-1.86012	0.0628691	0.15292
JADE1	ENSG00000077684	protein_coding	2813.43	-0.455628	0.0603938	-7.54428	4.54783e-14	4.74076e-12
SLC25A43	ENSG00000077713	protein_coding	812.364	0.0710104	0.0766299	0.926667	0.354099	0.523725
UBE2A	ENSG00000077721	protein_coding	2037.37	0.0143965	0.0544229	0.26453	0.791371	0.875846
FGFR1	ENSG00000077782	protein_coding	1575.42	-1.34838	0.274612	-4.91011	9.1025e-07	1.83387e-05
FKBP6	ENSG00000077800	protein_coding	5.72219	-0.369567	0.164937	-2.24066	0.0250483	0.0770635
SMC1B	ENSG00000077935	protein_coding	151.091	0.100857	0.19661	0.512981	0.607964	0.744982
FBLN1	ENSG00000077942	protein_coding	154.015	-2.01398	0.398396	-5.05522	4.29901e-07	9.65165e-06
ITGA8	ENSG00000077943	protein_coding	33.8376	0.253034	0.286084	0.884476	0.37644	0.5455
CST7	ENSG00000077984	protein_coding	4927.24	-1.46425	0.269542	-5.43235	5.5616e-08	1.5876e-06
MAP2	ENSG00000078018	protein_coding	8.7192	0.245934	0.240514	1.02253	0.306528	0.474563
PIAS2	ENSG00000078043	protein_coding	2099.56	-0.318773	0.0737498	-4.32235	1.54374e-05	0.000201272
AMPH	ENSG00000078053	protein_coding	134.965	0.237208	0.193349	1.22684	0.219885	0.37774
ARAF	ENSG00000078061	protein_coding	3258.59	0.218521	0.0784039	2.78712	0.00531786	0.0234378
MCCC1	ENSG00000078070	protein_coding	1462.83	-0.123263	0.0588261	-2.09538	0.036137	0.101424
LAMP3	ENSG00000078081	protein_coding	20.6746	0.190787	0.228094	0.836439	0.402908	0.570818
FAP	ENSG00000078098	protein_coding	3.07902	-0.345741	0.316326	-1.09299	0.274399	0.440285
NEBL	ENSG00000078114	protein_coding	16.9625	0.0427876	0.287378	0.148889	0.881641	0.932749
ACER3	ENSG00000078124	protein_coding	2291.11	0.509989	0.102394	4.98065	6.3371e-07	1.34977e-05
UBE2K	ENSG00000078140	protein_coding	3488.14	-0.113011	0.0526664	-2.14578	0.0318901	0.0924324
PIK3C3	ENSG00000078142	protein_coding	2634.21	-0.101816	0.0610833	-1.66684	0.095547	0.208365
N4BP2	ENSG00000078177	protein_coding	2677.99	-0.214961	0.0940985	-2.28442	0.0223468	0.0707619
TIGAR	ENSG00000078237	protein_coding	301.03	0.897133	0.134744	6.65807	2.77443e-11	1.67232e-09
TULP3	ENSG00000078246	protein_coding	313.457	-0.115944	0.0758301	-1.52899	0.126266	0.255831
SYNJ2	ENSG00000078269	protein_coding	1095.63	-0.101684	0.172369	-0.589921	0.555244	0.703692
ADCY2	ENSG00000078295	protein_coding	140.558	-0.0936494	0.423122	-0.221329	0.824836	0.897877
PPP2R5C	ENSG00000078304	protein_coding	4012.05	0.175552	0.0561134	3.12853	0.00175684	0.00980973
PMS2P1	ENSG00000078319	transcribed_unprocessed_pseudogene	375.394	-0.28558	0.0637986	-4.47627	7.59589e-06	0.000110552
RBFOX1	ENSG00000078328	protein_coding	1.36918	0.0633136	0.356825	0.177436	0.859166	0.919702
GNB1	ENSG00000078369	protein_coding	12659.2	0.170815	0.0611161	2.79493	0.00519117	0.0230106
HOXA9	ENSG00000078399	protein_coding	1797.01	0.587346	0.402121	1.46062	0.14412	0.280867
EDN1	ENSG00000078401	protein_coding	13.1262	0.621698	0.152049	4.08881	4.33594e-05	0.000483015
MLLT10	ENSG00000078403	protein_coding	4261.49	-0.131098	0.0579447	-2.26247	0.0236686	0.0738599
ZCWPW1	ENSG00000078487	protein_coding	428.599	0.774028	0.114832	6.74051	1.57834e-11	1.00281e-09
ADCYAP1R1	ENSG00000078549	protein_coding	1.07553	0.178456	0.327389	0.54509	0.585692	0.72779
FGF20	ENSG00000078579	protein_coding	0.89282	-0.0410854	0.498835	-0.0823627	0.934358	0.963747
P2RY10	ENSG00000078589	protein_coding	181.584	-0.407224	0.196335	-2.07413	0.0380674	0.105452
ITM2A	ENSG00000078596	protein_coding	4129.73	-1.0447	0.259134	-4.03152	5.54165e-05	0.000594521
NRDC	ENSG00000078618	protein_coding	6819.47	0.0453882	0.0492519	0.921552	0.356762	0.526398
VDAC3	ENSG00000078668	protein_coding	3166.24	-0.112434	0.0701311	-1.6032	0.108891	0.229341
PCM1	ENSG00000078674	protein_coding	9200.54	-0.365059	0.0603854	-6.04548	1.48967e-09	6.35808e-08
TNRC6C	ENSG00000078687	protein_coding	1499.48	-0.395524	0.0998636	-3.96064	7.47492e-05	0.000757953
CBFA2T2	ENSG00000078699	protein_coding	2159.57	-0.00699761	0.0394875	-0.177211	0.859343	0.919778
BRINP1	ENSG00000078725	protein_coding	0.433346	0.112735	0.476351	0.236664	0.812917	0.890196
ITCH	ENSG00000078747	protein_coding	3125.85	0.08584	0.0520045	1.65063	0.0988151	0.213624
PKD2L2	ENSG00000078795	protein_coding	222.483	-0.23063	0.12567	-1.8352	0.0664764	0.159126
TP53INP2	ENSG00000078804	protein_coding	1790.45	0.943731	0.280164	3.36849	0.000755799	0.00503748
SDF4	ENSG00000078808	protein_coding	2831.93	0.127744	0.0893575	1.42958	0.152836	0.292526
MYH7B	ENSG00000078814	protein_coding	524.665	0.0326746	0.101155	0.323016	0.746683	0.846433
BPIFB2	ENSG00000078898	protein_coding	0.477496	-0.0435648	0.391477	-0.111283	0.911392	0.950839
TP73	ENSG00000078900	protein_coding	157.429	-0.277174	0.260539	-1.06385	0.287398	0.454541
TOLLIP	ENSG00000078902	protein_coding	1539.38	0.479213	0.083475	5.7408	9.42305e-09	3.29494e-07
UBE2D4	ENSG00000078967	protein_coding	548.09	-0.105935	0.0610046	-1.73651	0.082473	0.186768
CLUL1	ENSG00000079101	protein_coding	6.35649	-0.639134	0.177808	-3.59451	0.000325002	0.00252031
RUNX1T1	ENSG00000079102	protein_coding	21.5091	-2.44468	0.395544	-6.18055	6.38788e-10	2.99791e-08
CDH17	ENSG00000079112	protein_coding	1.89274	-0.0706775	0.27328	-0.258627	0.795923	0.879137
THOC1	ENSG00000079134	protein_coding	2254.06	-0.286326	0.0561005	-5.10381	3.32888e-07	7.70128e-06
FKBP7	ENSG00000079150	protein_coding	226.352	-0.563251	0.0891011	-6.32149	2.59053e-10	1.31615e-08
OSBPL6	ENSG00000079156	protein_coding	32.6851	-0.943121	0.297826	-3.16668	0.00154189	0.00884046
SLC1A3	ENSG00000079215	protein_coding	665.533	0.991982	0.231958	4.27656	1.89806e-05	0.00023964
XRCC5	ENSG00000079246	protein_coding	9990.19	-0.0636138	0.0588451	-1.08104	0.27968	0.445975
LXN	ENSG00000079257	protein_coding	514.3	-0.427832	0.146966	-2.9111	0.00360154	0.0172596
SP140	ENSG00000079263	protein_coding	405.778	-0.0375637	0.169644	-0.221427	0.82476	0.897839
MKNK1	ENSG00000079277	protein_coding	3281.02	0.201219	0.1014	1.98441	0.0472103	0.123702
TNS1	ENSG00000079308	protein_coding	1736.51	-0.235576	0.193412	-1.218	0.223222	0.381316
REXO1	ENSG00000079313	protein_coding	2239.5	0.164442	0.0976951	1.68322	0.0923331	0.203292
SAR1A	ENSG00000079332	protein_coding	2312.44	0.106	0.0631743	1.6779	0.093366	0.204863
CDC14A	ENSG00000079335	protein_coding	1442.16	0.043526	0.0651315	0.66828	0.503955	0.661572
RAPGEF3	ENSG00000079337	protein_coding	466.288	0.628455	0.186651	3.36701	0.000759891	0.00505791
CEACAM1	ENSG00000079385	protein_coding	396.36	0.276109	0.230157	1.19966	0.230272	0.389843
SENP1	ENSG00000079387	protein_coding	1087.62	-0.129586	0.0536017	-2.41758	0.0156241	0.0538421
DUSP13	ENSG00000079393	protein_coding	2.60622	0.495689	0.268373	1.84702	0.0647447	0.156179
CIC	ENSG00000079432	protein_coding	5644.73	0.367382	0.0969611	3.78896	0.000151277	0.00135285
LIPE	ENSG00000079435	protein_coding	429.784	0.059265	0.10707	0.553518	0.579909	0.723323
FDFT1	ENSG00000079459	protein_coding	4174.3	0.0194591	0.0779517	0.24963	0.802874	0.883522
PAFAH1B3	ENSG00000079462	protein_coding	314.288	-0.0781899	0.110747	-0.706025	0.480172	0.641086
OPHN1	ENSG00000079482	protein_coding	251.325	0.552774	0.199284	2.77381	0.00554046	0.0241832
AFM	ENSG00000079557	protein_coding	0.211435	0.119416	0.664428	0.179728	0.857366
KIF22	ENSG00000079616	protein_coding	1908.76	-0.00717221	0.0850809	-0.0842987	0.932819	0.962944
SCGN	ENSG00000079689	protein_coding	0.462846	0.415082	0.614255	0.675749	0.4992	0.657414
CARMIL1	ENSG00000079691	protein_coding	285.579	1.00597	0.216267	4.65153	3.29482e-06	5.4311e-05
PGM1	ENSG00000079739	protein_coding	1054.51	-0.067084	0.147328	-0.455339	0.648865	0.775931
DDX1	ENSG00000079785	protein_coding	2461.32	-0.212448	0.0663918	-3.1999	0.00137473	0.00806899
DNM2	ENSG00000079805	protein_coding	10305.6	0.195143	0.0728232	2.67968	0.0073692	0.0301262
EPB41L2	ENSG00000079819	protein_coding	1626.7	0.398473	0.241734	1.6484	0.0992714	0.214297
RIMS1	ENSG00000079841	protein_coding	4.17793	-1.00295	0.365281	-2.7457	0.00603811	0.025851
MOXD1	ENSG00000079931	protein_coding	17.4639	0.181835	0.230343	0.789409	0.429873	0.596806
STX7	ENSG00000079950	protein_coding	3570.53	0.347791	0.0791206	4.39571	1.1041e-05	0.000151486
RABL2B	ENSG00000079974	protein_coding	738.1	-0.125898	0.0775782	-1.62285	0.104622	0.222723
KEAP1	ENSG00000079999	protein_coding	1834.28	-0.0648879	0.0797986	-0.813146	0.416134	0.583565
DDX43	ENSG00000080007	protein_coding	91.3663	0.117225	0.178464	0.656858	0.511272	0.667754
PTPRH	ENSG00000080031	protein_coding	61.3298	0.213169	0.295138	0.722269	0.470129	0.632613
DCT	ENSG00000080166	protein_coding	5.59225	-0.51615	0.233834	-2.20733	0.0272909	0.0821991
SLC35C2	ENSG00000080189	protein_coding	2766.79	-0.212445	0.0918036	-2.31412	0.0206611	0.0667309
CRYBG3	ENSG00000080200	protein_coding	815.97	1.0583	0.205848	5.1412	2.72983e-07	6.4871e-06
EPHA6	ENSG00000080224	protein_coding	0.666089	-0.575684	0.412082	-1.39701	0.16241	0.305544
SCTR	ENSG00000080293	protein_coding	3.39429	0.793456	0.33818	2.34625	0.0189634	0.0624357
RFX3	ENSG00000080298	protein_coding	980.064	-0.103064	0.0884125	-1.16572	0.243727	0.405796
RIF1	ENSG00000080345	protein_coding	5892.13	-0.411184	0.0739518	-5.56017	2.69518e-08	8.40878e-07
RAB21	ENSG00000080371	protein_coding	2225.23	-0.0508258	0.067102	-0.757441	0.448786	0.613318
SLC4A4	ENSG00000080493	protein_coding	67.2023	-0.802246	0.284516	-2.81969	0.00480707	0.0216739
SMARCA2	ENSG00000080503	protein_coding	6885.11	-0.10593	0.0687737	-1.54028	0.123493	0.251588
RDH8	ENSG00000080511	protein_coding	0.686975	-0.192066	0.320542	-0.599191	0.549045	0.698494
SESN1	ENSG00000080546	protein_coding	1720.64	0.325161	0.123791	2.62669	0.00862186	0.0340198
MID2	ENSG00000080561	protein_coding	39.0551	-0.115507	0.264869	-0.43609	0.662771	0.786484
DNAAF6	ENSG00000080572	protein_coding	0.315459	-0.0754736	0.508062	-0.148552	0.881907	0.932851
COL5A3	ENSG00000080573	protein_coding	59.1051	0.0887007	0.249896	0.354951	0.722627	0.830231
SRCAP	ENSG00000080603	protein_coding	13261.2	0.0700147	0.0529308	1.32276	0.185915	0.335736
PUM3	ENSG00000080608	protein_coding	1263.76	-0.16023	0.0699281	-2.29135	0.0219429	0.0698274
CPB2	ENSG00000080618	protein_coding	19.4986	0.0263849	0.164896	0.160009	0.872874	0.927295
CHRNA3	ENSG00000080644	protein_coding	13.5986	-0.0585432	0.266589	-0.219601	0.826182	0.898765
KCNN2	ENSG00000080709	protein_coding	4.24182	2.08076	0.531699	3.91342	9.09996e-05	0.000888986
CNOT4	ENSG00000080802	protein_coding	1340.98	-0.140093	0.0556648	-2.51672	0.0118451	0.0435968
PSEN1	ENSG00000080815	protein_coding	4338.73	0.32205	0.0628505	5.12407	2.99017e-07	7.03303e-06
CPOX	ENSG00000080819	protein_coding	1076.83	-0.300221	0.11349	-2.64536	0.00816041	0.0326291
CLDND1	ENSG00000080822	protein_coding	1923.7	-0.0524537	0.0526064	-0.997098	0.318717	0.487698
MOK	ENSG00000080823	protein_coding	368.713	-0.579023	0.192548	-3.00716	0.00263697	0.013556
HSP90AA1	ENSG00000080824	protein_coding	27909.6	-0.236929	0.0823502	-2.87709	0.00401363	0.0188225
RBL1	ENSG00000080839	protein_coding	1697.72	-0.082114	0.0931426	-0.881594	0.377996	0.546955
DLGAP4	ENSG00000080845	protein_coding	2026.55	0.0992068	0.0822685	1.20589	0.22786	0.386949
IGSF9B	ENSG00000080854	protein_coding	170.045	-0.954892	0.29418	-3.24594	0.00117062	0.00711606
CFHR2	ENSG00000080910	protein_coding	0
CROCCP3	ENSG00000080947	transcribed_unprocessed_pseudogene	506.894	-0.0888869	0.101881	-0.87246	0.382957	0.551691
NDC80	ENSG00000080986	protein_coding	555.655	-0.392084	0.133057	-2.94672	0.00321159	0.0158338
AP4E1	ENSG00000081014	protein_coding	1004.21	0.022735	0.0614588	0.369922	0.711441	0.821255
RSBN1	ENSG00000081019	protein_coding	1581.43	-0.22775	0.0555019	-4.10347	4.06997e-05	0.000458226
MAGI3	ENSG00000081026	protein_coding	230.483	-0.447563	0.167856	-2.66635	0.00766801	0.0311152
CXCL2	ENSG00000081041	protein_coding	429.059	0.274647	0.25816	1.06386	0.287391	0.454541
AFP	ENSG00000081051	protein_coding	0.370458	-0.821406	0.556281	-1.4766	0.139782	0.274721
COL4A4	ENSG00000081052	protein_coding	107.34	0.100496	0.134356	0.747981	0.454472	0.618342
TCF7	ENSG00000081059	protein_coding	1445.28	-0.0476418	0.172187	-0.276687	0.782021	0.869625
OSTM1	ENSG00000081087	protein_coding	1087.34	0.415067	0.105645	3.9289	8.53351e-05	0.00084445
CDH7	ENSG00000081138	protein_coding	2.77388	-0.270561	0.288839	-0.93672	0.348903	0.518358
IMPG2	ENSG00000081148	protein_coding	86.9401	0.00752306	0.148305	0.0507271	0.959543	0.977175
PCNP	ENSG00000081154	protein_coding	3103.44	-0.126135	0.0572637	-2.20271	0.0276152	0.0829605
EXD2	ENSG00000081177	protein_coding	661.441	-0.23593	0.11319	-2.08437	0.0371264	0.103551
ARG2	ENSG00000081181	protein_coding	92.3288	0.0898032	0.12709	0.706611	0.479808	0.640887
MEF2C	ENSG00000081189	protein_coding	4624.06	0.445056	0.180221	2.4695	0.0135301	0.0482404
PTPRC	ENSG00000081237	protein_coding	18826.9	0.705608	0.101585	6.946	3.75777e-12	2.69822e-10
CACNA1S	ENSG00000081248	protein_coding	1.5319	0.098339	0.321672	0.305712	0.759824	0.855224
PKP1	ENSG00000081277	protein_coding	1.39208	0.138302	0.285342	0.48469	0.627896	0.760071
UBA5	ENSG00000081307	protein_coding	1352.77	-0.263089	0.0581515	-4.5242	6.06244e-06	9.17609e-05
STK17B	ENSG00000081320	protein_coding	7785	0.326395	0.137811	2.36842	0.0178642	0.0596187
CDC14B	ENSG00000081377	protein_coding	106.855	-0.422717	0.235936	-1.79166	0.0731874	0.170924
ZNF510	ENSG00000081386	protein_coding	827.907	-0.215949	0.0715853	-3.01666	0.00255575	0.013229
LRP2	ENSG00000081479	protein_coding	13.1135	-0.0439216	0.256417	-0.17129	0.863996	0.922455
ZNF506	ENSG00000081665	protein_coding	2155.55	-0.449482	0.0903213	-4.97648	6.47512e-07	1.37454e-05
JMJD4	ENSG00000081692	protein_coding	290.569	-0.0277219	0.0807516	-0.343298	0.731374	0.836096
DUSP12	ENSG00000081721	protein_coding	456.728	-0.0484517	0.0600787	-0.806471	0.419971	0.587459
AACS	ENSG00000081760	protein_coding	722.496	0.0398997	0.101165	0.394404	0.693283	0.808596
DELE1	ENSG00000081791	protein_coding	3323.24	0.239875	0.0602853	3.979	6.92054e-05	0.000713025
SLC13A1	ENSG00000081800	protein_coding	0.297413	-0.227842	0.492173	-0.462931	0.643414
CADPS2	ENSG00000081803	protein_coding	13.0255	-0.260502	0.319128	-0.816293	0.414332	0.581886
PCDHB4	ENSG00000081818	protein_coding	4.18848	-0.155661	0.421689	-0.369138	0.712025	0.821651
PCDHA6	ENSG00000081842	protein_coding	1.30889	-0.614483	0.45802	-1.34161	0.179724	0.327896
PCDHGA2	ENSG00000081853	protein_coding	23.4318	-0.385385	0.288501	-1.33582	0.181609	0.330321
HSPB11	ENSG00000081870	protein_coding	882.041	-0.267347	0.060631	-4.4094	1.03656e-05	0.000143464
PHLPP1	ENSG00000081913	protein_coding	1821.56	-0.369751	0.112727	-3.28005	0.00103789	0.00647541
ATP8B1	ENSG00000081923	protein_coding	1129.13	-0.161163	0.109357	-1.47373	0.140555	0.275752
IL12RB2	ENSG00000081985	protein_coding	203.734	0.307817	0.289926	1.06171	0.288367	0.455503
SMARCD3	ENSG00000082014	protein_coding	708.529	0.702926	0.207097	3.39419	0.000688308	0.00466342
WDR70	ENSG00000082068	protein_coding	1258.95	-0.014592	0.0371116	-0.393193	0.694177	0.809362
FYB1	ENSG00000082074	protein_coding	7816.23	0.438441	0.14768	2.96885	0.00298914	0.0149636
MPP4	ENSG00000082126	protein_coding	13.6236	-0.848676	0.175751	-4.82885	1.37325e-06	2.60108e-05
STRADB	ENSG00000082146	protein_coding	1005.6	-0.293799	0.0942037	-3.11876	0.00181614	0.0100765
BZW1	ENSG00000082153	protein_coding	3030.16	-0.112944	0.065101	-1.73491	0.0827572	0.187262
PGR	ENSG00000082175	protein_coding	2.35399	0.0377855	0.317047	0.119179	0.905133	0.947187
C1QTNF3	ENSG00000082196	protein_coding	315.507	-0.408691	0.0930168	-4.39374	1.11418e-05	0.000152634
ME2	ENSG00000082212	protein_coding	3593.54	0.0666668	0.0613901	1.08595	0.2775	0.443557
C5orf22	ENSG00000082213	protein_coding	875.395	-0.0503961	0.0683534	-0.737287	0.460948	0.624373
CCNT2	ENSG00000082258	protein_coding	3028.42	-0.0851159	0.0538182	-1.58154	0.113754	0.236969
FAM135A	ENSG00000082269	protein_coding	912.988	-0.117457	0.1147	-1.02404	0.305817	0.47391
COL19A1	ENSG00000082293	protein_coding	44.3282	-0.338395	0.246514	-1.37272	0.16984	0.314991
EPB41L3	ENSG00000082397	protein_coding	581.167	2.55885	0.363688	7.03583	1.98075e-12	1.50778e-10
COBLL1	ENSG00000082438	protein_coding	1020.24	0.260963	0.286986	0.909321	0.363181	0.533011
DLG3	ENSG00000082458	protein_coding	92.5587	0.291398	0.254076	1.1469	0.251425	0.414562
KCNK2	ENSG00000082482	protein_coding	0.694576	-0.2434	0.391113	-0.622326	0.533727	0.686214
SERTAD4	ENSG00000082497	protein_coding	4.35107	-0.236528	0.338232	-0.699306	0.484361	0.644759
TRAF5	ENSG00000082512	protein_coding	1944.12	-0.18944	0.14831	-1.27732	0.201488	0.355147
MRPL22	ENSG00000082515	protein_coding	469.846	-0.105777	0.0659426	-1.60408	0.108696	0.229072
GEMIN5	ENSG00000082516	protein_coding	1157.86	-0.31272	0.0749755	-4.17097	3.03306e-05	0.000356429
OPRK1	ENSG00000082556	protein_coding	5.36617	0.165044	0.345733	0.477375	0.633095	0.763835
NFE2L1	ENSG00000082641	protein_coding	3647.98	0.0540143	0.0700248	0.77136	0.440493	0.606099
SEMA5B	ENSG00000082684	protein_coding	7.45322	-0.994312	0.308044	-3.22782	0.00124736	0.00748602
GSK3B	ENSG00000082701	protein_coding	2938.59	-0.00395055	0.0556053	-0.0710462	0.943361	0.968117
ITGB5	ENSG00000082781	protein_coding	201.097	0.308932	0.228712	1.35075	0.176776	0.324053
ERC1	ENSG00000082805	protein_coding	2670.42	0.0712088	0.0581715	1.22412	0.220908	0.3789
XPO1	ENSG00000082898	protein_coding	11672.9	-0.131658	0.0551305	-2.38812	0.0169347	0.0572327
LINC01587	ENSG00000082929	lncRNA	3.63259	-0.808509	0.51772	-1.56167	0.118365	0.243772
RNF13	ENSG00000082996	protein_coding	1568.32	0.540825	0.082258	6.57474	4.87384e-11	2.79697e-09
TRPM3	ENSG00000083067	protein_coding	4.26031	0.0603733	0.222786	0.270992	0.786397	0.872352
PALB2	ENSG00000083093	protein_coding	702.793	-0.152221	0.0620405	-2.45357	0.0141445	0.0499198
DOP1A	ENSG00000083097	protein_coding	1717.97	0.137446	0.0775736	1.77181	0.0764259	0.17645
LYRM2	ENSG00000083099	protein_coding	892.052	-0.0644815	0.0589246	-1.09431	0.273821	0.439692
BCKDHB	ENSG00000083123	protein_coding	682.369	-0.513293	0.0664079	-7.7294	1.08053e-14	1.26978e-12
KAT6A	ENSG00000083168	protein_coding	6348.5	-0.0275876	0.0708902	-0.389159	0.697158	0.811662
TUT7	ENSG00000083223	protein_coding	2762.06	0.533466	0.0909388	5.86621	4.45864e-09	1.69119e-07
ULK2	ENSG00000083290	protein_coding	770.618	0.779254	0.173124	4.50113	6.75939e-06	0.000100506
GRHL2	ENSG00000083307	protein_coding	7.44952	-0.387488	0.233666	-1.6583	0.0972577	0.210999
TNPO1	ENSG00000083312	protein_coding	4785.1	-0.111488	0.0713324	-1.56294	0.118066	0.2433
PLOD1	ENSG00000083444	protein_coding	1937.9	0.620201	0.124258	4.99125	5.99897e-07	1.28393e-05
P2RX5	ENSG00000083454	protein_coding	476.265	-0.725608	0.191849	-3.78218	0.000155458	0.00138382
ITGAE	ENSG00000083457	protein_coding	935.372	-0.0639925	0.1576	-0.406045	0.68471	0.802643
DIS3	ENSG00000083520	protein_coding	2477.29	-0.141799	0.0526052	-2.69552	0.00702787	0.0290661
PIBF1	ENSG00000083535	protein_coding	1135.25	-0.308534	0.0617692	-4.99495	5.88499e-07	1.26197e-05
TDRD3	ENSG00000083544	protein_coding	673.635	-0.0944464	0.0515298	-1.83285	0.0668247	0.15971
AC000061.1	ENSG00000083622	lncRNA	0.0498398	0.0110846	1.76761	0.00627096	0.994997
NUFIP1	ENSG00000083635	protein_coding	279.256	-0.406673	0.0634617	-6.40816	1.47285e-10	7.86167e-09
PDS5B	ENSG00000083642	protein_coding	2842.6	-0.094678	0.0676657	-1.3992	0.161752	0.304695
OXCT1	ENSG00000083720	protein_coding	816.037	-0.125782	0.133259	-0.94389	0.345226	0.514723
RRAGB	ENSG00000083750	protein_coding	760.079	-0.0938208	0.0985256	-0.952248	0.340971	0.510443
EPYC	ENSG00000083782	protein_coding	0.828713	1.97228	1.01079	1.95124	0.0510287	0.131079
CYLD	ENSG00000083799	protein_coding	3906.31	0.171542	0.0641491	2.67412	0.00749257	0.0305657
SLC27A5	ENSG00000083807	protein_coding	272.945	-0.178206	0.0805571	-2.21217	0.0269551	0.0814704
ZNF324	ENSG00000083812	protein_coding	565.468	-0.154109	0.0609899	-2.52679	0.0115109	0.042661
ZNF671	ENSG00000083814	protein_coding	789.401	-0.343317	0.0834632	-4.1134	3.89881e-05	0.000442101
ZNF416	ENSG00000083817	protein_coding	134.754	-0.349994	0.0968467	-3.6139	0.000301626	0.00238029
ZNF586	ENSG00000083828	protein_coding	1096.14	-0.225974	0.0665513	-3.39548	0.000685084	0.00464655
ZNF446	ENSG00000083838	protein_coding	329.563	-0.157515	0.0811309	-1.9415	0.0521982	0.133372
ZNF264	ENSG00000083844	protein_coding	2324.34	-0.159451	0.0817627	-1.95017	0.0511561	0.131327
RPS5	ENSG00000083845	protein_coding	16781.2	-0.052797	0.0993752	-0.531289	0.595218	0.735358
FAT1	ENSG00000083857	protein_coding	50.8169	0.104552	0.366998	0.284884	0.775733	0.865806
YTHDC1	ENSG00000083896	protein_coding	3804.63	-0.10354	0.045907	-2.25542	0.0241068	0.0749055
CHMP2B	ENSG00000083937	protein_coding	798.007	0.150447	0.0867932	1.73339	0.0830261	0.187736
SMAP2	ENSG00000084070	protein_coding	7665.36	0.69199	0.12892	5.36759	7.97972e-08	2.18631e-06
PPIE	ENSG00000084072	protein_coding	1128.48	-0.115417	0.0804997	-1.43375	0.151643	0.29118
ZMPSTE24	ENSG00000084073	protein_coding	1274.65	-0.0508385	0.0730345	-0.696088	0.486374	0.646538
STARD7	ENSG00000084090	protein_coding	5015.24	0.122469	0.0563037	2.17516	0.0296184	0.0874381
NOA1	ENSG00000084092	protein_coding	1511.36	-0.0507994	0.0593239	-0.856306	0.391829	0.560349
REST	ENSG00000084093	protein_coding	4008.43	-0.366001	0.0722944	-5.06265	4.13476e-07	9.32226e-06
HAL	ENSG00000084110	protein_coding	1763.88	0.0283552	0.238392	0.118944	0.90532	0.947248
SSH1	ENSG00000084112	protein_coding	2851.4	0.192701	0.0619462	3.11078	0.00186594	0.0102922
GSTP1	ENSG00000084207	protein_coding	5615.87	0.394351	0.109895	3.58845	0.000332652	0.00256706
APLP2	ENSG00000084234	protein_coding	26891.7	0.469064	0.122907	3.81642	0.000135402	0.00123013
FAM234B	ENSG00000084444	protein_coding	505.381	-0.370198	0.101154	-3.65973	0.00025248	0.00205808
SLCO1A2	ENSG00000084453	protein_coding	1.42014	-0.742905	0.303134	-2.45075	0.0142561	0.0501937
WBP11	ENSG00000084463	protein_coding	3241.8	-0.00384041	0.05797	-0.0662482	0.94718	0.970224
EIF3I	ENSG00000084623	protein_coding	2935.17	0.0726339	0.0765224	0.949185	0.342527	0.511949
NKAIN1	ENSG00000084628	protein_coding	5.92321	-1.84572	0.366955	-5.02983	4.90906e-07	1.08202e-05
COL16A1	ENSG00000084636	protein_coding	30.6492	-0.483623	0.24992	-1.93511	0.0529768	0.134823
TXLNA	ENSG00000084652	protein_coding	3206.35	-0.153588	0.0495736	-3.09818	0.00194716	0.0106373
APOB	ENSG00000084674	protein_coding	14.187	-0.85287	0.373042	-2.28626	0.0222391	0.0705014
NCOA1	ENSG00000084676	protein_coding	4741.51	0.145178	0.0619777	2.34242	0.0191589	0.0629391
AGBL5	ENSG00000084693	protein_coding	1075.74	-0.290754	0.0634046	-4.58569	4.52483e-06	7.1441e-05
EFR3B	ENSG00000084710	protein_coding	125.285	-1.34749	0.257514	-5.23268	1.67071e-07	4.18415e-06
KIF3C	ENSG00000084731	protein_coding	497.415	-0.37186	0.118709	-3.13252	0.00173314	0.00970834
RAB10	ENSG00000084733	protein_coding	5098.36	0.159212	0.0749381	2.12458	0.0336219	0.0961001
GCKR	ENSG00000084734	protein_coding	3.31667	-0.0024278	0.283728	-0.00855681	0.993173	0.996949
HADHA	ENSG00000084754	protein_coding	7705.63	0.1045	0.0726967	1.43748	0.150582	0.289713
MAPRE3	ENSG00000084764	protein_coding	131.229	0.638772	0.169979	3.75794	0.000171315	0.00150114
CAD	ENSG00000084774	protein_coding	4690.2	-0.21288	0.0925817	-2.29937	0.0214839	0.0687222
CD59	ENSG00000085063	protein_coding	1245.62	-0.55277	0.204035	-2.70919	0.00674479	0.02819
CD82	ENSG00000085117	protein_coding	3504.08	-0.127455	0.141629	-0.899918	0.368164	0.537794
BCORL1	ENSG00000085185	protein_coding	1781.95	-0.13378	0.0950476	-1.40751	0.159276	0.301492
ATRX	ENSG00000085224	protein_coding	8084.88	-0.190513	0.0734596	-2.59344	0.00950199	0.0367015
AK6	ENSG00000085231	protein_coding	473.607	-0.362334	0.0748815	-4.83876	1.30651e-06	2.49794e-05
FCN1	ENSG00000085265	protein_coding	8667.85	2.79415	0.283755	9.84704	7.05937e-23	3.06933e-20
MYNN	ENSG00000085274	protein_coding	770.529	-0.222533	0.0533215	-4.17342	3.00061e-05	0.000353647
MECOM	ENSG00000085276	protein_coding	84.4461	0.898131	0.40278	2.22983	0.0257588	0.0787082
SCAMP1	ENSG00000085365	protein_coding	1540.99	-0.306006	0.0787939	-3.88363	0.000102909	0.000984912
PREP	ENSG00000085377	protein_coding	1606.41	0.136573	0.055134	2.47711	0.0132453	0.0474646
HACE1	ENSG00000085382	protein_coding	924.639	-0.423247	0.085893	-4.92761	8.32418e-07	1.70104e-05
SEH1L	ENSG00000085415	protein_coding	2413.75	-0.431849	0.0630439	-6.84997	7.3865e-12	5.02679e-10
WDR47	ENSG00000085433	protein_coding	883.297	0.0519731	0.0591766	0.87827	0.379797	0.548693
WDFY1	ENSG00000085449	protein_coding	2988.02	0.313937	0.103487	3.0336	0.00241653	0.0126318
OVGP1	ENSG00000085465	protein_coding	108.355	0.384941	0.130726	2.94464	0.00323328	0.0159177
SLC25A24	ENSG00000085491	protein_coding	1648.4	0.488558	0.123369	3.96015	7.49022e-05	0.000758837
MAP3K4	ENSG00000085511	protein_coding	1714.3	-0.132976	0.0435822	-3.05115	0.00227969	0.0120551
PILRA	ENSG00000085514	protein_coding	1090.18	1.83593	0.178664	10.2759	9.05013e-25	6.07497e-22
IGSF9	ENSG00000085552	protein_coding	39.4631	0.400065	0.197206	2.02867	0.0424918	0.114518
ABCB1	ENSG00000085563	protein_coding	559.973	-0.778407	0.284631	-2.73479	0.00624198	0.026529
ZNF213	ENSG00000085644	protein_coding	752.192	0.26926	0.0879426	3.06177	0.00220031	0.011739
AKR1B1	ENSG00000085662	protein_coding	981.747	0.484009	0.154463	3.13349	0.0017274	0.00969109
CPNE3	ENSG00000085719	protein_coding	2525.08	0.480855	0.15015	3.20251	0.00136236	0.00801229
RRN3	ENSG00000085721	protein_coding	1453.27	-0.106476	0.0704306	-1.51178	0.13059	0.261777
CTTN	ENSG00000085733	protein_coding	143.038	-0.504118	0.264733	-1.90425	0.0568781	0.142076
WNT11	ENSG00000085741	protein_coding	40.4832	-0.856238	0.272211	-3.14549	0.00165808	0.00938159
MTIF2	ENSG00000085760	protein_coding	1200.82	-0.142729	0.0583821	-2.44473	0.014496	0.0508462
DDHD2	ENSG00000085788	protein_coding	2121.06	-0.295725	0.0735463	-4.02093	5.79681e-05	0.000616162
TTC39A	ENSG00000085831	protein_coding	100.785	-0.0355457	0.163793	-0.217016	0.828196	0.900274
EPS15	ENSG00000085832	protein_coding	6382.05	-0.207226	0.0642832	-3.22364	0.0012657	0.00757456
ORC1	ENSG00000085840	protein_coding	899.283	-0.139557	0.11814	-1.18129	0.237488	0.398554
MGST2	ENSG00000085871	protein_coding	1023.73	0.205021	0.109123	1.87881	0.0602705	0.148079
CHERP	ENSG00000085872	protein_coding	2159.76	-0.0505596	0.0751721	-0.672585	0.501211	0.659064
ATG16L1	ENSG00000085978	protein_coding	1225.8	0.0175811	0.0486881	0.361095	0.718028	0.826534
USP40	ENSG00000085982	protein_coding	1551.3	0.213356	0.10259	2.0797	0.037553	0.104419
POMGNT1	ENSG00000085998	protein_coding	1212.66	-0.0643854	0.0683876	-0.941477	0.34646	0.515952
RAD54L	ENSG00000085999	protein_coding	724.993	-0.174051	0.0956344	-1.81996	0.0687645	0.163131
MAST2	ENSG00000086015	protein_coding	1565.44	0.226824	0.0851585	2.66355	0.00773201	0.0313089
DNAJA1	ENSG00000086061	protein_coding	4881.89	-0.0028316	0.0698094	-0.0405619	0.967645	0.982009
B4GALT1	ENSG00000086062	protein_coding	3268.24	0.647705	0.0885545	7.3142	2.5892e-13	2.33105e-11
CHMP5	ENSG00000086065	protein_coding	1147.78	0.0772462	0.0681242	1.1339	0.256836	0.420402
NFX1	ENSG00000086102	protein_coding	2996.79	-0.0148877	0.0416424	-0.357513	0.720708	0.828606
AQP6	ENSG00000086159	protein_coding	13.3339	-0.684916	0.240648	-2.84613	0.00442542	0.0203191
DIMT1	ENSG00000086189	protein_coding	1717.32	-0.34733	0.0570835	-6.0846	1.16783e-09	5.14811e-08
IPO11	ENSG00000086200	protein_coding	1047.86	-0.378657	0.0763642	-4.95857	7.10141e-07	1.48857e-05
FOLH1	ENSG00000086205	protein_coding	12.036	0.848723	0.491866	1.72552	0.0844343	0.190037
EIF2AK1	ENSG00000086232	protein_coding	4968.9	-0.0911287	0.0711963	-1.27996	0.200558	0.354056
NME8	ENSG00000086288	protein_coding	346.995	0.266808	0.194155	1.3742	0.16938	0.314423
EPDR1	ENSG00000086289	protein_coding	1029.53	-0.698741	0.127718	-5.47099	4.47535e-08	1.30356e-06
SNX10	ENSG00000086300	protein_coding	1591.92	1.03166	0.172862	5.96812	2.4e-09	9.69221e-08
SEPHS1	ENSG00000086475	protein_coding	1141.4	-0.166829	0.0479839	-3.47677	0.000507491	0.00363573
MRPL28	ENSG00000086504	protein_coding	778.733	0.282333	0.0905736	3.11716	0.00182601	0.0101185
HBQ1	ENSG00000086506	protein_coding	26.4295	-0.439715	0.210382	-2.09007	0.0366112	0.102411
ITPKC	ENSG00000086544	protein_coding	369.552	0.240424	0.0791972	3.03576	0.00239931	0.0125637
CEACAM6	ENSG00000086548	protein_coding	194.81	-0.96248	0.39863	-2.41447	0.0157583	0.054205
FAT2	ENSG00000086570	protein_coding	194.942	0.43066	0.165676	2.59942	0.00933818	0.0362299
RBM22	ENSG00000086589	protein_coding	3015.66	0.0383498	0.055663	0.688964	0.490846	0.650181
TMED2	ENSG00000086598	protein_coding	4622.76	-0.0743185	0.0635329	-1.16976	0.242096	0.403976
ERO1B	ENSG00000086619	protein_coding	854.941	-0.118382	0.0910487	-1.30021	0.193529	0.345291
ZFAND6	ENSG00000086666	protein_coding	1943.82	0.112283	0.0646223	1.73753	0.0822945	0.186567
HSD17B2	ENSG00000086696	protein_coding	9.79619	0.213024	0.302499	0.704214	0.481299	0.641969
TXLNG	ENSG00000086712	protein_coding	1327.84	-0.213695	0.0536741	-3.98134	6.85266e-05	0.000707512
PPEF1	ENSG00000086717	protein_coding	5.80217	0.715987	0.211892	3.37902	0.000727435	0.00488001
LAT2	ENSG00000086730	protein_coding	5802.38	0.165215	0.163757	1.0089	0.313022	0.481678
HUWE1	ENSG00000086758	protein_coding	18819.2	-0.0611611	0.0610973	-1.00104	0.316806	0.485874
ZW10	ENSG00000086827	protein_coding	642.144	-0.154585	0.0570025	-2.71189	0.00669004	0.0280141
ALG9	ENSG00000086848	protein_coding	396.654	-0.355606	0.0504037	-7.05516	1.72408e-12	1.3307e-10
MYBPC2	ENSG00000086967	protein_coding	12.5772	0.712865	0.235188	3.03105	0.00243707	0.0127138
NOX4	ENSG00000086991	protein_coding	0.632693	-0.479454	0.386731	-1.23976	0.215064	0.371897
ACOX3	ENSG00000087008	protein_coding	619.3	0.0504051	0.0536477	0.939559	0.347444	0.516936
MTMR2	ENSG00000087053	protein_coding	1289.62	-0.286877	0.0672593	-4.26523	1.99692e-05	0.000250198
PPP1R15A	ENSG00000087074	protein_coding	6513.35	0.305043	0.122007	2.5002	0.0124122	0.0451996
HSD17B14	ENSG00000087076	protein_coding	14.0183	0.194388	0.302668	0.642249	0.520712	0.67492
TRIP6	ENSG00000087077	protein_coding	468.981	0.386545	0.188121	2.05477	0.0399015	0.109321
ACHE	ENSG00000087085	protein_coding	101.002	-0.223255	0.318612	-0.700712	0.483483	0.644086
FTL	ENSG00000087086	protein_coding	32479	0.916714	0.139629	6.56536	5.19077e-11	2.97114e-09
SRRT	ENSG00000087087	protein_coding	3732.38	0.0766111	0.0707403	1.08299	0.278812	0.44498
BAX	ENSG00000087088	protein_coding	1738.49	0.148739	0.110443	1.34675	0.178062	0.325818
NLK	ENSG00000087095	protein_coding	1594.64	-0.0356024	0.115141	-0.309208	0.757163	0.853462
PIGS	ENSG00000087111	protein_coding	2312.19	0.178084	0.0707097	2.51852	0.0117848	0.043436
ADAMTS2	ENSG00000087116	protein_coding	1048.16	0.799304	0.415239	1.92493	0.0542386	0.137216
TMPRSS11E	ENSG00000087128	protein_coding	0.501208	0.351497	0.569551	0.617147	0.537138	0.689045
ATXN7L3	ENSG00000087152	protein_coding	2852.9	0.226322	0.0736274	3.07388	0.00211293	0.0113466
PGS1	ENSG00000087157	protein_coding	2281.41	0.204274	0.0684831	2.98284	0.00285586	0.0144516
PSMC5	ENSG00000087191	protein_coding	2415.54	0.0592296	0.0615601	0.962143	0.335978	0.505032
UIMC1	ENSG00000087206	protein_coding	1460.03	0.129222	0.0613173	2.10743	0.0350806	0.099169
CETP	ENSG00000087237	protein_coding	125.977	0.373589	0.255319	1.46323	0.143405	0.279921
MMP2	ENSG00000087245	protein_coding	1830.39	-1.36759	0.329042	-4.15628	3.23471e-05	0.000376036
MT3	ENSG00000087250	protein_coding	0.740692	0.483575	0.347017	1.39352	0.163462	0.306937
LPCAT2	ENSG00000087253	protein_coding	3866.05	-0.456417	0.125744	-3.62972	0.000283727	0.00226771
GNAO1	ENSG00000087258	protein_coding	37.4911	0.244512	0.191673	1.27568	0.20207	0.355872
OGFOD1	ENSG00000087263	protein_coding	1349.58	-0.244917	0.0627059	-3.9058	9.39151e-05	0.00091324
SH3BP2	ENSG00000087266	protein_coding	7167.18	1.04479	0.104494	9.99859	1.54588e-23	7.6097e-21
NOP14	ENSG00000087269	protein_coding	2021.73	-0.159039	0.0512534	-3.10299	0.00191579	0.0105049
ADD1	ENSG00000087274	protein_coding	9017.62	0.18246	0.0469473	3.88649	0.000101704	0.000976544
L2HGDH	ENSG00000087299	protein_coding	425.655	-0.424733	0.0804528	-5.27928	1.29693e-07	3.36404e-06
TXNDC16	ENSG00000087301	protein_coding	534.546	-0.255195	0.096011	-2.65797	0.00786126	0.031699
RTRAF	ENSG00000087302	protein_coding	2504.73	-0.105551	0.0552724	-1.90964	0.0561791	0.140759
NID2	ENSG00000087303	protein_coding	117.732	-0.634892	0.1718	-3.69553	0.000219432	0.00183806
GMCL1	ENSG00000087338	protein_coding	1784.51	-0.525338	0.06239	-8.42023	3.7576e-17	7.05394e-15
SF3B2	ENSG00000087365	protein_coding	5541.24	0.0460468	0.0548624	0.839316	0.401292	0.569402
KLHL42	ENSG00000087448	protein_coding	1637.41	-0.138162	0.0616895	-2.23964	0.0251142	0.0772448
GNAS	ENSG00000087460	protein_coding	26969.1	-0.0308362	0.0722236	-0.426955	0.669412	0.791275
DNM1L	ENSG00000087470	protein_coding	4674.1	-0.066343	0.0483274	-1.37278	0.169821	0.314978
PTHLH	ENSG00000087494	protein_coding	2.40175	-0.125701	0.310679	-0.4046	0.685771	0.803409
PHACTR3	ENSG00000087495	protein_coding	102.552	0.605098	0.428859	1.41095	0.15826	0.300068
ERGIC2	ENSG00000087502	protein_coding	1221.97	-0.239228	0.0607047	-3.94084	8.11953e-05	0.000809086
TFAP2C	ENSG00000087510	protein_coding	0.869111	0.728243	0.388795	1.87308	0.0610577	0.149524
AURKA	ENSG00000087586	protein_coding	503.223	-0.262034	0.136261	-1.92304	0.0544754	0.137674
CASS4	ENSG00000087589	protein_coding	701.026	0.458293	0.175054	2.61801	0.00884454	0.0347222
PIR	ENSG00000087842	protein_coding	38.1027	-0.807283	0.280108	-2.88204	0.00395114	0.0185944
AAMDC	ENSG00000087884	protein_coding	247.752	-0.115785	0.0570619	-2.02912	0.0424465	0.114436
RFX2	ENSG00000087903	protein_coding	1110.27	0.228956	0.136935	1.672	0.0945234	0.206717
METTL2A	ENSG00000087995	protein_coding	389.154	-0.303775	0.0556548	-5.4582	4.80999e-08	1.39006e-06
SULT2B1	ENSG00000088002	protein_coding	58.6338	0.0572996	0.265713	0.215645	0.829264	0.900993
ALG6	ENSG00000088035	protein_coding	802.354	-0.158669	0.0539913	-2.93879	0.00329494	0.0161513
CNOT3	ENSG00000088038	protein_coding	2579.27	0.106599	0.0633409	1.68294	0.0923866	0.203369
GP6	ENSG00000088053	protein_coding	270.242	-0.228744	0.20977	-1.09045	0.275515	0.441308
PTPN4	ENSG00000088179	protein_coding	1303.87	-0.369498	0.0938518	-3.93704	8.24918e-05	0.000819976
DDX18	ENSG00000088205	protein_coding	3042.86	-0.179084	0.053972	-3.31808	0.000906373	0.00581368
KHSRP	ENSG00000088247	protein_coding	6317.71	-0.112257	0.0754745	-1.48736	0.136921	0.270659
GNA11	ENSG00000088256	protein_coding	338.802	0.046708	0.161238	0.289684	0.772058	0.863489
ASAP3	ENSG00000088280	protein_coding	30.0111	-0.00698729	0.247718	-0.0282066	0.977497	0.987511
EDEM2	ENSG00000088298	protein_coding	1347.77	0.115507	0.0700471	1.64899	0.0991491	0.214096
DNMT3B	ENSG00000088305	protein_coding	1543.74	-0.0461801	0.18743	-0.246386	0.805383	0.88512
REM1	ENSG00000088320	protein_coding	2.11076	-0.000215374	0.294849	-0.000730458	0.999417	0.99984
TPX2	ENSG00000088325	protein_coding	2235.49	-0.319819	0.129647	-2.46684	0.013631	0.0485132
FER1L4	ENSG00000088340	transcribed_unitary_pseudogene	151.162	0.367203	0.230581	1.59251	0.11127	0.232958
PDRG1	ENSG00000088356	protein_coding	312.619	-0.0911274	0.0868627	-1.0491	0.294134	0.46152
EPB41L1	ENSG00000088367	protein_coding	41.0548	-0.619761	0.233845	-2.65031	0.00804189	0.0322454
SLC15A1	ENSG00000088386	protein_coding	2.60944	-0.362694	0.197764	-1.83397	0.0666587	0.159442
DOCK9	ENSG00000088387	protein_coding	352.093	0.428324	0.235233	1.82085	0.0686294	0.162914
ANKRD10	ENSG00000088448	protein_coding	5109.94	0.0181007	0.0618321	0.292739	0.769721	0.861984
TGDS	ENSG00000088451	protein_coding	551.054	-0.16454	0.0612964	-2.68433	0.00726757	0.0297987
DOCK3	ENSG00000088538	protein_coding	173.986	-0.195876	0.272625	-0.718484	0.472459	0.634571
C3orf18	ENSG00000088543	protein_coding	120.127	-0.116088	0.117641	-0.986796	0.323742	0.492729
COQ9	ENSG00000088682	protein_coding	956.409	0.114571	0.0624918	1.83338	0.0667455	0.159589
TMEM40	ENSG00000088726	protein_coding	16.6791	0.0584663	0.331504	0.176367	0.860006	0.920066
KIF9	ENSG00000088727	protein_coding	446.225	-0.0990281	0.0905098	-1.09411	0.273905	0.439779
ARHGAP28	ENSG00000088756	protein_coding	7.9069	-0.330193	0.274038	-1.20492	0.228235	0.387443
CRLS1	ENSG00000088766	protein_coding	1399.54	-0.0707176	0.0622095	-1.13677	0.255636	0.41912
DEFB127	ENSG00000088782	protein_coding	0.0414196	-0.0268829	2.19819	-0.0122296	0.990242
PPP1R13B	ENSG00000088808	protein_coding	212.961	-0.429302	0.216925	-1.97904	0.0478118	0.124902
ATRN	ENSG00000088812	protein_coding	2855.6	0.176509	0.067527	2.61391	0.00895122	0.0350292
SMOX	ENSG00000088826	protein_coding	403.222	0.236522	0.175914	1.34453	0.178776	0.326706
SIGLEC1	ENSG00000088827	protein_coding	758.806	3.43077	0.333102	10.2994	7.08714e-25	4.98383e-22
FKBP1A	ENSG00000088832	protein_coding	5221.04	0.357075	0.085122	4.19486	2.73038e-05	0.000326312
NSFL1C	ENSG00000088833	protein_coding	2415.63	0.190817	0.0682744	2.79485	0.00519235	0.0230106
SLC4A11	ENSG00000088836	protein_coding	123.538	-0.489681	0.250619	-1.95389	0.0507144	0.130431
C20orf194	ENSG00000088854	protein_coding	2507.06	0.404577	0.108684	3.72253	0.000197238	0.00168497
ZNF343	ENSG00000088876	protein_coding	350.971	-0.0484003	0.0588148	-0.822928	0.410549	0.57837
EBF4	ENSG00000088881	protein_coding	88.7021	-1.17314	0.328154	-3.57496	0.00035028	0.00267837
CPXM1	ENSG00000088882	protein_coding	4266.27	-0.211668	0.172385	-1.22788	0.219492	0.377315
MAVS	ENSG00000088888	protein_coding	11189.5	-0.0348434	0.0544387	-0.640048	0.522141	0.67609
LZTS3	ENSG00000088899	protein_coding	78.4529	-0.108881	0.195554	-0.556781	0.577677	0.721697
F11	ENSG00000088926	protein_coding	1.59077	0.334117	0.393326	0.849466	0.395622	0.563994
XRN2	ENSG00000088930	protein_coding	5088.8	-0.0468831	0.0599696	-0.781782	0.434343	0.60094
KIZ	ENSG00000088970	protein_coding	1026.51	-0.438938	0.0916932	-4.78703	1.69271e-06	3.11171e-05
DYNLL1	ENSG00000088986	protein_coding	2541.61	-0.101148	0.0897041	-1.12758	0.259498	0.423508
TESC	ENSG00000088992	protein_coding	793.257	-0.506749	0.20828	-2.43302	0.0149735	0.0521026
SNX5	ENSG00000089006	protein_coding	4365.48	-0.0661426	0.0652793	-1.01323	0.310953	0.47937
RPL6	ENSG00000089009	protein_coding	19368.7	-0.0657171	0.0822594	-0.798901	0.424348	0.591526
SIRPG	ENSG00000089012	protein_coding	109.013	0.161153	0.214397	0.751655	0.452259	0.616164
MAPKAPK5	ENSG00000089022	protein_coding	2209.88	-0.139097	0.0370639	-3.75289	0.00017481	0.00152393
P2RX7	ENSG00000089041	protein_coding	1584.02	1.20931	0.158727	7.61881	2.56021e-14	2.80754e-12
ESF1	ENSG00000089048	protein_coding	963.331	-0.328334	0.0705464	-4.65415	3.25319e-06	5.37984e-05
RBBP9	ENSG00000089050	protein_coding	467.081	-0.174241	0.0766696	-2.27263	0.0230488	0.0723898
ANAPC5	ENSG00000089053	protein_coding	8035.27	-0.0938698	0.0467952	-2.00597	0.0448595	0.119266
SLC23A2	ENSG00000089057	protein_coding	2548.04	0.230796	0.0656614	3.51494	0.00043985	0.00323699
SLC8B1	ENSG00000089060	protein_coding	1979.71	0.390707	0.089428	4.36896	1.2484e-05	0.000167804
TMEM230	ENSG00000089063	protein_coding	2467.6	-0.0652681	0.0572568	-1.13992	0.254321	0.417868
DZANK1	ENSG00000089091	protein_coding	211.248	-0.0521352	0.0931041	-0.559966	0.575502	0.720077
KDM2B	ENSG00000089094	protein_coding	3185.13	0.129079	0.0538065	2.39894	0.0164424	0.0559785
CFAP61	ENSG00000089101	protein_coding	3.72349	0.0832776	0.231453	0.359803	0.718995	0.827259
LHX5	ENSG00000089116	protein_coding	0.708198	-0.00725539	0.342814	-0.0211642	0.983115	0.991002
TASP1	ENSG00000089123	protein_coding	424.264	-0.590291	0.0761845	-7.74818	9.32181e-15	1.1192e-12
OAS1	ENSG00000089127	protein_coding	1014.38	1.74925	0.173655	10.0732	7.261e-24	3.78452e-21
GCN1	ENSG00000089154	protein_coding	6522.82	-0.016394	0.0608062	-0.26961	0.78746	0.873066
RPLP0	ENSG00000089157	protein_coding	42969.3	0.0102386	0.0869485	0.117755	0.906262	0.947834
PXN	ENSG00000089159	protein_coding	3667.94	0.870257	0.121593	7.15711	8.23983e-13	6.66148e-11
SIRT4	ENSG00000089163	protein_coding	25.9505	-0.403781	0.10969	-3.6811	0.000232226	0.00192269
RPH3A	ENSG00000089169	protein_coding	51.2537	2.55661	0.331258	7.71787	1.18286e-14	1.37544e-12
KIF16B	ENSG00000089177	protein_coding	561.035	0.87423	0.191885	4.556	5.21369e-06	8.07631e-05
TRMT6	ENSG00000089195	protein_coding	694.106	0.26666	0.0890128	2.99575	0.0027377	0.0139765
CHGB	ENSG00000089199	protein_coding	7.97903	-0.0508181	0.222104	-0.228803	0.819022	0.893946
PEBP1	ENSG00000089220	protein_coding	3067.09	-0.28934	0.0855828	-3.38082	0.000722705	0.00485562
TBX5	ENSG00000089225	protein_coding	0.62913	0.155459	0.356368	0.436233	0.662668	0.786387
BRAP	ENSG00000089234	protein_coding	1220.13	-0.0237038	0.0345936	-0.685208	0.493213	0.652476
ERP29	ENSG00000089248	protein_coding	3799.04	0.149567	0.0846465	1.76696	0.0772356	0.177874
NOS1	ENSG00000089250	protein_coding	3.96363	-0.0807833	0.169289	-0.477192	0.633225	0.763908
FUS	ENSG00000089280	protein_coding	12937.5	-0.139912	0.045411	-3.08102	0.00206295	0.011141
IGBP1	ENSG00000089289	protein_coding	2041.48	0.0872865	0.0715882	1.21929	0.222735	0.380896
FXYD5	ENSG00000089327	protein_coding	7775.6	0.100599	0.114956	0.875113	0.381513	0.55029
ZNF302	ENSG00000089335	protein_coding	1196.37	-0.284594	0.0888204	-3.20415	0.0013546	0.00797511
GRAMD1A	ENSG00000089351	protein_coding	3831.25	-0.0314286	0.0853075	-0.368415	0.712564	0.821952
FXYD3	ENSG00000089356	protein_coding	8.91371	-0.947055	0.25494	-3.71481	0.000203356	0.00172526
HEPH	ENSG00000089472	protein_coding	19.8508	-0.944773	0.309534	-3.05225	0.00227134	0.0120224
CDIP1	ENSG00000089486	protein_coding	1541.38	-0.306334	0.122217	-2.50646	0.0121945	0.0445925
CMTM1	ENSG00000089505	protein_coding	139.997	0.0642351	0.141336	0.454486	0.649479	0.776395
KCNH4	ENSG00000089558	protein_coding	65.8962	0.203768	0.214053	0.951952	0.341121	0.510616
GANAB	ENSG00000089597	protein_coding	16219.5	-0.197323	0.0666471	-2.96072	0.00306922	0.0152854
GMIP	ENSG00000089639	protein_coding	4483.54	0.671317	0.0988606	6.79055	1.1171e-11	7.31029e-10
RBM41	ENSG00000089682	protein_coding	983.483	-0.142622	0.0760289	-1.87589	0.0606707	0.148749
BIRC5	ENSG00000089685	protein_coding	700.352	-0.248306	0.139115	-1.78489	0.0742784	0.172816
LAG3	ENSG00000089692	protein_coding	128.624	1.2499	0.261583	4.77823	1.76849e-06	3.22957e-05
MLF2	ENSG00000089693	protein_coding	3150.99	0.178731	0.0935898	1.90972	0.0561689	0.140742
OTUB2	ENSG00000089723	protein_coding	88.85	-0.0592101	0.10959	-0.540286	0.589	0.730365
DDX24	ENSG00000089737	protein_coding	4119.54	-0.028896	0.0665589	-0.434142	0.664185	0.787744
ZBTB25	ENSG00000089775	protein_coding	1408.93	-0.0727419	0.0583697	-1.24623	0.212681	0.368928
NECAP1	ENSG00000089818	protein_coding	1478.19	0.220677	0.0638512	3.45611	0.000548032	0.00387151
ARHGAP4	ENSG00000089820	protein_coding	9078.16	0.706092	0.152662	4.62521	3.74222e-06	6.08409e-05
ANKRD24	ENSG00000089847	protein_coding	69.9921	0.334203	0.164148	2.03599	0.0417511	0.113104
DHX32	ENSG00000089876	protein_coding	917.94	-0.147722	0.10654	-1.38653	0.165584	0.309586
RCOR1	ENSG00000089902	protein_coding	3457.9	0.0532008	0.0662957	0.802478	0.422277	0.589548
GPATCH2L	ENSG00000089916	protein_coding	5764.87	-0.0686825	0.065596	-1.04705	0.295075	0.462493
LTBP4	ENSG00000090006	protein_coding	1601.91	-0.224325	0.198671	-1.12913	0.258844	0.42258
BLVRB	ENSG00000090013	protein_coding	1338.37	0.529829	0.189722	2.79266	0.0052276	0.0231413
SLC9A1	ENSG00000090020	protein_coding	1576.26	0.393043	0.077692	5.05899	4.21493e-07	9.4837e-06
SPTLC1	ENSG00000090054	protein_coding	1452.72	0.144943	0.0539952	2.68437	0.00726665	0.0297977
PAPOLA	ENSG00000090060	protein_coding	9372.67	-0.0771655	0.0493118	-1.56485	0.117618	0.242624
CCNK	ENSG00000090061	protein_coding	768.68	0.0590098	0.0580936	1.01577	0.309739	0.477875
PCBP4	ENSG00000090097	protein_coding	228.114	-0.111767	0.194081	-0.575878	0.564698	0.711198
RGS1	ENSG00000090104	protein_coding	784.104	0.557881	0.26772	2.08383	0.037176	0.103639
YPEL3	ENSG00000090238	protein_coding	1874.74	0.45636	0.131396	3.47316	0.000514366	0.00367666
MRPS33	ENSG00000090263	protein_coding	472.415	-0.268784	0.0912042	-2.94706	0.00320814	0.0158271
NDUFB2	ENSG00000090266	protein_coding	934.685	-0.0579432	0.0894354	-0.647878	0.517064	0.672121
NUDC	ENSG00000090273	protein_coding	1717.55	0.046766	0.0771457	0.606203	0.54438	0.694853
MAEA	ENSG00000090316	protein_coding	2137	0.203407	0.0567971	3.5813	0.00034189	0.00262418
ICAM1	ENSG00000090339	protein_coding	796.419	0.781496	0.167938	4.65347	3.26394e-06	5.39159e-05
STRN4	ENSG00000090372	protein_coding	3601.72	0.370852	0.0828123	4.47823	7.52658e-06	0.000109651
IRAK3	ENSG00000090376	protein_coding	11560.1	0.342373	0.11646	2.93982	0.00328399	0.0161066
LYZ	ENSG00000090382	protein_coding	108947	1.56535	0.290686	5.38502	7.24367e-08	2.00658e-06
SI	ENSG00000090402	protein_coding	0.214325	0.348729	0.694306	0.502269	0.615478
MUL1	ENSG00000090432	protein_coding	618.914	0.166644	0.0695691	2.39537	0.0166036	0.0563841
TFAP4	ENSG00000090447	protein_coding	785.753	-0.294551	0.0729564	-4.03736	5.40572e-05	0.000581568
PDCD7	ENSG00000090470	protein_coding	1086.86	-0.118662	0.0482851	-2.45752	0.0139898	0.0494912
SPG21	ENSG00000090487	protein_coding	2984.86	0.475144	0.0747045	6.36031	2.01348e-10	1.04699e-08
FETUB	ENSG00000090512	protein_coding	0.327514	0.0391738	0.416697	0.0940104	0.925101	0.959282
DNAJB11	ENSG00000090520	protein_coding	2113.4	-0.153259	0.0840959	-1.82243	0.0683893	0.162493
P3H2	ENSG00000090530	protein_coding	32.4644	0.364655	0.290071	1.25712	0.208709	0.364089
THPO	ENSG00000090534	protein_coding	1.84891	0.210737	0.297408	0.708579	0.478586	0.639768
CHRD	ENSG00000090539	protein_coding	7.3853	0.257749	0.233774	1.10256	0.270219	0.435629
FLT3LG	ENSG00000090554	protein_coding	94.1012	0.320216	0.126182	2.53774	0.0111572	0.0416599
RAB11FIP3	ENSG00000090565	protein_coding	1601.18	-0.0623762	0.112782	-0.55307	0.580215	0.723542
GNPTG	ENSG00000090581	protein_coding	1418.17	0.218153	0.0847494	2.5741	0.0100502	0.0383278
ZNF268	ENSG00000090612	protein_coding	768.287	-0.223406	0.0808017	-2.76487	0.00569459	0.0246818
GOLGA3	ENSG00000090615	protein_coding	4311.87	-0.0742371	0.0536296	-1.38426	0.16628	0.310544
PABPC4	ENSG00000090621	protein_coding	7045.1	-0.0924259	0.0719975	-1.28374	0.199234	0.352475
CD209	ENSG00000090659	protein_coding	53.0494	1.80996	0.298901	6.05539	1.40077e-09	6.04859e-08
CERS4	ENSG00000090661	protein_coding	649.778	-0.73271	0.235393	-3.1127	0.00185382	0.0102419
MCOLN1	ENSG00000090674	protein_coding	874.76	0.866565	0.120614	7.1846	6.74028e-13	5.54016e-11
USP48	ENSG00000090686	protein_coding	5377.17	-0.186199	0.0684469	-2.72034	0.00652142	0.0274429
EFNB1	ENSG00000090776	protein_coding	369.627	0.138653	0.186938	0.741704	0.458267	0.621787
PDPR	ENSG00000090857	protein_coding	5233.48	0.108316	0.0800454	1.35318	0.175998	0.322987
AARS1	ENSG00000090861	protein_coding	2450.06	-0.107807	0.0747645	-1.44196	0.149314	0.288087
GLG1	ENSG00000090863	protein_coding	6718.05	0.428737	0.0744579	5.75811	8.50592e-09	3.01229e-07
KIF4A	ENSG00000090889	protein_coding	615.589	-0.234937	0.141217	-1.66366	0.0961801	0.209235
TNRC6A	ENSG00000090905	protein_coding	3752.55	-0.0436336	0.0404886	-1.07768	0.281178	0.447821
PLEKHG2	ENSG00000090924	protein_coding	2630	0.266807	0.13724	1.9441	0.0518838	0.132791
DLL3	ENSG00000090932	protein_coding	28.1396	-3.33409	0.358228	-9.30717	1.31285e-20	3.87754e-18
NAT14	ENSG00000090971	protein_coding	220.197	-0.305471	0.138897	-2.19927	0.0278591	0.0835037
PITPNM2	ENSG00000090975	protein_coding	1247.34	-0.249084	0.147912	-1.684	0.0921813	0.203099
EXOC1	ENSG00000090989	protein_coding	2060.82	0.205433	0.0579002	3.54805	0.000388088	0.00291513
RBM27	ENSG00000091009	protein_coding	1079.46	-0.19476	0.0750015	-2.59674	0.00941124	0.036449
POU4F3	ENSG00000091010	protein_coding	1.08365	-0.322807	0.274611	-1.17551	0.239791	0.401356
OSBPL8	ENSG00000091039	protein_coding	5580.38	0.199221	0.0926128	2.15112	0.0314666	0.091492
DTX2	ENSG00000091073	protein_coding	582.386	0.286119	0.0878502	3.2569	0.00112636	0.006901
NLRC4	ENSG00000091106	protein_coding	554.969	1.68169	0.195817	8.58807	8.84458e-18	1.83103e-15
PUS7	ENSG00000091127	protein_coding	708.292	-0.569997	0.0953088	-5.98053	2.22414e-09	9.07332e-08
LAMB4	ENSG00000091128	protein_coding	4.89045	-1.44898	0.39754	-3.64488	0.000267518	0.00216321
NRCAM	ENSG00000091129	protein_coding	18.9011	-1.51485	0.260718	-5.81028	6.23678e-09	2.28354e-07
LAMB1	ENSG00000091136	protein_coding	228.527	-0.0989506	0.128922	-0.76752	0.442772	0.607932
SLC26A4	ENSG00000091137	protein_coding	15.049	-0.0062711	0.161364	-0.0388631	0.969	0.982919
SLC26A3	ENSG00000091138	protein_coding	3.6637	-0.0704622	0.226322	-0.311336	0.755545	0.852523
DLD	ENSG00000091140	protein_coding	2066.53	-0.0553179	0.0767282	-0.72096	0.470934	0.633273
WDR7	ENSG00000091157	protein_coding	1369.07	0.179929	0.073651	2.443	0.0145658	0.0510422
TXNL1	ENSG00000091164	protein_coding	1994.59	-0.203276	0.0541286	-3.75542	0.000173049	0.00151245
IL5RA	ENSG00000091181	protein_coding	198.839	-1.60281	0.303051	-5.28892	1.23044e-07	3.2066e-06
ABCC6	ENSG00000091262	protein_coding	457.917	-0.053112	0.159436	-0.333123	0.739041	0.841344
CMTM6	ENSG00000091317	protein_coding	4928.05	0.2204	0.0941599	2.3407	0.0192478	0.0631272
ITGA6	ENSG00000091409	protein_coding	3357.83	-0.178165	0.172286	-1.03412	0.301078	0.469113
RAPGEF4	ENSG00000091428	protein_coding	44.2008	0.109191	0.246097	0.443691	0.657266	0.782093
MAP3K20	ENSG00000091436	protein_coding	2146.9	0.476577	0.195864	2.4332	0.0149659	0.0520927
SMPX	ENSG00000091482	protein_coding	0.325187	0.0777773	0.776753	0.100131	0.92024	0.956377
FH	ENSG00000091483	protein_coding	1192.75	0.131821	0.0795522	1.65703	0.0975125	0.211438
SEL1L3	ENSG00000091490	protein_coding	2795.19	0.606352	0.178131	3.40396	0.000664167	0.00452341
TF	ENSG00000091513	protein_coding	151.19	-0.0673854	0.270053	-0.249526	0.802954	0.883544
CDV3	ENSG00000091527	protein_coding	6129.25	0.0775125	0.0613959	1.2625	0.206768	0.361733
MYO15A	ENSG00000091536	protein_coding	84.3428	0.525368	0.126014	4.16911	3.05796e-05	0.000358784
ALKBH5	ENSG00000091542	protein_coding	2438.47	0.11165	0.0641623	1.74012	0.0818377	0.185835
APOH	ENSG00000091583	protein_coding	0.375357	-0.153639	0.384491	-0.39959	0.689459	0.805805
NLRP1	ENSG00000091592	protein_coding	5703.19	1.26207	0.152253	8.28927	1.13945e-16	1.90495e-14
PITPNM3	ENSG00000091622	protein_coding	53.4009	-0.0337655	0.156222	-0.216138	0.82888	0.900752
SPAG7	ENSG00000091640	protein_coding	982.114	0.149524	0.0704155	2.12345	0.0337159	0.096319
ORC6	ENSG00000091651	protein_coding	580.929	-0.155073	0.10971	-1.41348	0.157515	0.298989
ZFHX4	ENSG00000091656	protein_coding	18.1317	-0.166595	0.300161	-0.555019	0.578881	0.722774
SLC17A6	ENSG00000091664	protein_coding	0.369313	0.672857	0.628531	1.07052	0.284385	0.45137
CPA1	ENSG00000091704	protein_coding	2.98563	-0.48863	0.234934	-2.07986	0.0375386	0.104392
ZC3HC1	ENSG00000091732	protein_coding	595.776	-0.165297	0.0544195	-3.03746	0.00238582	0.0125028
ESR1	ENSG00000091831	protein_coding	133.413	0.212099	0.171006	1.24031	0.214862	0.371692
RGS17	ENSG00000091844	protein_coding	95.9562	-0.417627	0.15738	-2.65363	0.00796308	0.031996
ANGPT2	ENSG00000091879	protein_coding	310.842	-0.0931833	0.139303	-0.668926	0.503543	0.661187
TMEM101	ENSG00000091947	protein_coding	518.632	-0.017117	0.0635075	-0.269528	0.787524	0.873115
CD200	ENSG00000091972	protein_coding	1118.07	-0.523339	0.28858	-1.81349	0.0697556	0.164862
CCDC80	ENSG00000091986	protein_coding	171.395	0.0558755	0.196789	0.283937	0.776459	0.866192
CMA1	ENSG00000092009	protein_coding	5.13676	-0.891076	0.242721	-3.67119	0.000241425	0.00198292
PSME1	ENSG00000092010	protein_coding	3867.88	0.241362	0.0771501	3.12847	0.00175716	0.00980973
PPP2R3C	ENSG00000092020	protein_coding	1470.44	0.00101062	0.0619526	0.0163127	0.986985	0.993466
HAUS4	ENSG00000092036	protein_coding	864.555	0.229093	0.0851476	2.69054	0.00713354	0.0293934
JPH4	ENSG00000092051	protein_coding	126.428	1.13668	0.194336	5.84908	4.94298e-09	1.85899e-07
MYH7	ENSG00000092054	protein_coding	1.20344	0.243914	0.297149	0.820847	0.411733	0.579375
CEBPE	ENSG00000092067	protein_coding	268.053	-0.770926	0.268095	-2.87557	0.004033	0.0188973
SLC7A8	ENSG00000092068	protein_coding	173.691	0.12482	0.235714	0.529542	0.596429	0.736362
OSGEP	ENSG00000092094	protein_coding	2124.68	-0.012917	0.0549418	-0.235103	0.814129	0.891038
SLC22A17	ENSG00000092096	protein_coding	56.7214	0.0793233	0.258193	0.307225	0.758672	0.854297
RNF31	ENSG00000092098	protein_coding	1452.46	0.226608	0.0688082	3.29332	0.000990106	0.00623787
SCFD1	ENSG00000092108	protein_coding	1974.42	-0.0585766	0.0504263	-1.16163	0.245387	0.40777
G2E3	ENSG00000092140	protein_coding	1318.26	-0.208288	0.0665289	-3.13079	0.00174335	0.0097483
HECTD1	ENSG00000092148	protein_coding	6663	-0.0808479	0.0462302	-1.74881	0.0803238	0.1833
HNRNPC	ENSG00000092199	protein_coding	12004.9	-0.0266359	0.0445723	-0.597588	0.550115	0.699373
RPGRIP1	ENSG00000092200	protein_coding	77.7139	1.35387	0.160018	8.46072	2.65722e-17	5.18603e-15
SUPT16H	ENSG00000092201	protein_coding	5754.37	-0.163835	0.0631848	-2.59295	0.00951575	0.0367387
TOX4	ENSG00000092203	protein_coding	2423.62	0.127793	0.039421	3.24174	0.00118804	0.00720115
GEMIN2	ENSG00000092208	protein_coding	271.202	-0.264808	0.0576008	-4.5973	4.27999e-06	6.82565e-05
TGM1	ENSG00000092295	protein_coding	90.0445	0.49833	0.104302	4.77775	1.77264e-06	3.23582e-05
TINF2	ENSG00000092330	protein_coding	1650.61	0.310639	0.0540868	5.74334	9.28268e-09	3.25872e-07
DAZL	ENSG00000092345	protein_coding	1.30482	-0.00362918	0.295403	-0.0122855	0.990198	0.995468
TBL1Y	ENSG00000092377	protein_coding	4.36862	-0.463074	0.562919	-0.822629	0.410719	0.57848
SEMA6A	ENSG00000092421	protein_coding	428.452	0.346853	0.128307	2.7033	0.00686543	0.0285622
TRPM7	ENSG00000092439	protein_coding	4782.6	-0.0896268	0.0536331	-1.67111	0.0946999	0.207072
TYRO3	ENSG00000092445	protein_coding	107.126	-1.18214	0.21979	-5.37853	7.50985e-08	2.07234e-06
WDR76	ENSG00000092470	protein_coding	879.277	-0.17652	0.0981413	-1.79864	0.0720764	0.168952
CAPN3	ENSG00000092529	protein_coding	233.645	0.586873	0.117263	5.00474	5.59371e-07	1.21123e-05
SNAP23	ENSG00000092531	protein_coding	2206.01	0.104247	0.0610256	1.70825	0.0875891	0.195312
TBX15	ENSG00000092607	protein_coding	5.60283	-0.363664	0.300947	-1.2084	0.226893	0.385639
PHGDH	ENSG00000092621	protein_coding	870.782	-0.12666	0.22822	-0.554992	0.5789	0.722777
COL9A3	ENSG00000092758	protein_coding	76.6381	0.0780053	0.226034	0.345104	0.730016	0.835043
EZR	ENSG00000092820	protein_coding	3651.34	0.158603	0.11635	1.36315	0.172836	0.319009
MYL6	ENSG00000092841	protein_coding	9206.31	0.244139	0.0913287	2.67319	0.00751331	0.0306334
AGO1	ENSG00000092847	protein_coding	4203.91	0.187008	0.0659022	2.83766	0.00454451	0.0207498
TEKT2	ENSG00000092850	protein_coding	85.8209	-1.17499	0.241159	-4.87227	1.10324e-06	2.15221e-05
CLSPN	ENSG00000092853	protein_coding	1261.59	-0.0674787	0.127956	-0.52736	0.597944	0.737492
RFFL	ENSG00000092871	protein_coding	1337.59	0.0162771	0.0590641	0.275584	0.782867	0.870195
UNC13D	ENSG00000092929	protein_coding	7508.39	0.450521	0.108458	4.15388	3.26889e-05	0.000378717
MFSD11	ENSG00000092931	protein_coding	1027.76	0.137284	0.0469246	2.92562	0.00343771	0.0166777
DPYSL2	ENSG00000092964	protein_coding	2838.76	0.934673	0.212671	4.39493	1.10811e-05	0.000151989
TGFB2	ENSG00000092969	protein_coding	5.02114	-0.354521	0.210423	-1.6848	0.0920271	0.20284
GPATCH2	ENSG00000092978	protein_coding	597.891	0.0256168	0.0634484	0.403743	0.686402	0.803808
NUP50	ENSG00000093000	protein_coding	4005	0.00701532	0.0553716	0.126695	0.899182	0.943276
CDC45	ENSG00000093009	protein_coding	786.543	-0.130326	0.12244	-1.06441	0.287144	0.454253
COMT	ENSG00000093010	protein_coding	4182.43	-0.140601	0.105161	-1.33701	0.181221	0.32984
ADA2	ENSG00000093072	protein_coding	9735.08	1.35842	0.188171	7.21906	5.23468e-13	4.3757e-11
AC016026.1	ENSG00000093100	lncRNA	18.5994	-0.347951	0.138625	-2.51001	0.0120728	0.0442631
VNN3	ENSG00000093134	protein_coding	159.083	2.27919	0.313926	7.26028	3.86279e-13	3.34899e-11
ECHDC1	ENSG00000093144	protein_coding	1668.82	0.183721	0.0751073	2.44612	0.0144405	0.050722
[truncated: 54,495 more rows]

## Sheet: Table S5
The overlapping genes between significantly co-expressed genes and significantly differentially expressed genes of TNFAIP2 in AML.
PNCK
SAMD4A
MEFV
GLT1D1
RTN1
FGR
AQP9
TNS3
LEP
C9orf43
CCL22
ACSM3
LIPN
SIGLEC8
C5AR1
RELT
TRPM6
SLC8A1
AP1S2
CD1A
CHST15
FCN1
MYBPC1
ASS1
SLC9A9
DPYD
CACNB1
LAMB4
PILRA
ARAP1
ENHO
LILRA6
BST1
AHNAK
HK3
KLF4
HAPLN4
C17orf77
ATP7B
PPM1H
PPARGC1A
CASP5
HOXB5
SLC46A2
CATSPER1
OAS1
NOXA1
NECAB2
CPVL
FST
CXCR2P1
OR52K1
METTL7B
SVOPL
CASP1
APOA2
SECTM1
APOBEC3A
OLR1
GLIPR2
NCF1
FAM157A
TLR5
SLC16A2
SIGLEC1
CD93
SULF2
ARHGAP26
RBP7
ITGB2
FOLR2
EPB41L3
CDKN2B
THEG
TMEM132A
SLC11A1
ABI3
GRID1
CR1
EFR3B
FPR1
VNN3
ANXA2
HORMAD2
LGALS2
CACNA1C
KCNH3
CCL23
FCGR2A
NKAIN1
UNCX
BATF2
KRT80
C9orf72
GPR20
KIAA0513
SH3BP2
IL10
ALOX5AP
LRP1
SAMHD1
CDON
PADI4
TMEM38A
THSD7A
CAPN2
ZFP36L1
NR4A1
LGALS3
UPB1
GIMAP4
SHISA4
GLIS3
CPA3
THBS1
ACSL1
PTPRG
SRGAP1
LILRA1
SLC24A4
GRPR
PLXNB2
SLC15A3
GRIK3
ITGAX
RASGRP4
NADK
SGSH
CXCL10
CRIP1
SLC7A7
IL10RA
VCAN
NHS
ADAP2
ADAM8
HSPA7
FGF13
PGPEP1L
FAM157B
SLC6A12
ADCY4
PTPRJ
MPEG1
FPR2
TFEB
C10orf105
AIFM3
MARCO
IGSF6
HPSE
NLRP12
ZBTB7B
SORBS3
ARHGAP24
CD101
C1QA
NINJ1
ZNF703
S100A12
TREM1
CX3CR1
ODF3B
CCIN
KCNJ11
FAM20C
ABCC8
HOXB7
TWIST1
HORMAD1
DTNA
AANAT
LY96
RELL2
TYMP
C1orf162
ITGAL
FLVCR2
FOLR3
SAT1
RCN3
ARHGEF10L
ANKRD34B
SLC22A18AS
NCF1B
CD300C
NLRC4
KCNE1
CD4
UGT3A1
ACVRL1
FCGR2B
RXRA
ARPP21
ITGB4
TMEM150B
RAPH1
HRH4
INSC
TNFRSF11B
TNFSF15
NCF2
PLXNB1
PI4K2A
FGD4
LY86
NACC2
POU4F1
ISL2
PRKCD
SERPINA1
FCGR1B
SNX10
ZNF366
EFNB3
PTGFR
LRRC25
SELE
BATF3
MS4A6A
NR5A1
ITGB7
SCUBE1
PPM1M
SLC22A1
SERPINB2
MFSD2A
EGR2
FRMD6
ITGB6
TLR8
ABCC3
HLA-DMB
RHBDL3
HSPA6
ROBO1
IFNGR2
DUSP1
CPM
IER5L
IRX1
MRC2
NDFIP2
ANG
SLC26A11
G0S2
QPCT
PELI1
S100A8
MMEL1
SIRPD
OASL
AMIGO1
ASGR1
RAB17
MVP
DHRS9
CACNA2D3
VDR
C9orf106
ITGAM
RGS2
PDPN
OR7E91P
DLL3
GFRA3
ARHGEF11
ASGR2
CD163
ACTL8
OPLAH
TUBA4A
GPR65
FUT1
KIF26A
PECAM1
LSP1
CCR1
PSAP
DUSP6
SERPINE2
LILRB1
INA
SLC16A6
IL1R2
PLEKHN1
ACSM1
CYP27A1
AZGP1
FCGR2C
OXGR1
PURG
NLGN1
DGAT2
TNFRSF1B
CLEC1A
IQSEC1
PLBD1
CD300LB
PLEC
TXNDC2
SGMS2
SLC26A9
ADH1A
ST14
RHBDF2
S100A10
PTPRO
LYNX1
TLR4
RARG
MYO7A
CD96
IFNGR1
MYO1F
NRCAM
CUEDC1
TMEFF1
GPRIN3
TBC1D2
UNC119
KLK1
CLEC4A
AIM2
KCTD12
ADAM22
TNFSF9
PPFIA4
CFP
CTSZ
LMNA
CRIP3
WNT5B
FTCD
GNGT2
SIGLEC7
LPAR1
NKX3-2
ACOX2
CYP4F11
CSF1R
CRISPLD2
AOAH
TRNP1
GATM
MYO18B
CDH4
SFRP1
MTMR11
CES1
MS4A14
HLX
CEACAM3
KRT23
S100A9
UGT3A2
OR52K2
SPOCK1
KCNJ2
MGC16275
NCF1C
LPO
LILRB2
TMCC3
CCDC88B
AATK
FGFR1
FXYD6
UNC5A
HNMT
COL9A2
SIGLEC9
TLR1
ZMYND15
SSTR2
CARNS1
NKD1
HTR7
GIMAP1
C3
RIN2
SORT1
TICAM2
NFKB2
HLA-DRA
GUCY2C
HVCN1
SLED1
LRRK2
ZNF467
CST3
SULT1C2
CD300A
PKIB
CPAMD8
TNFSF12
GPR132
IQSEC2
GAA
HCK
GABBR1
CARD14
RASSF4
FTH1
IER3
ZNF107
CTSB
ZFP36
PCBP3
SGK1
NAIP
TBC1D8
SIGLEC16
TMPRSS13
IL13RA1
MAP1A
TMEM176A
FCGR3A
FCAR
BAG3
RUNX1T1
IL4I1
MSR1
RRAS
LAMC3
LST1
SPATA9
TPPP3
SEL1L2
EPHB3
GXYLT2
BCL6
PDZD7
OR10H1
C3orf70
TNFRSF8
C19orf38
CD86
LFNG
POU2F2
PDK4
LILRA5
GFRA2
NNMT
CARD16
TNFSF13
RPH3A
CD68
KCNQ1
EPCAM
BCL2A1
FGD2
DTX4
CYTH4
CD14
GSG1L
HMOX1
EXT1
FCGRT
PLD2
IRX6
PLCH1
NAMPT
UROC1
ATP9A
LILRB3
MS4A4A
RASL12
ADAMTS15
MEX3A
GPBAR1
SIRPA
SAMD11
ASPG
TLR7
CLEC7A
SLC37A2
SLC2A6
SLC38A3
GABRD
CD163L1
UBXN11
VENTX
FEZ1
TRPV4
EHD4
GPR35
NRGN
PID1
ANXA2P3
CYBB
CYTIP
C2
SLC43A2
FBP1
SRC
CRMP1
IL1RN
KRT7
MAFB
CD209
ADAMTS3
GRM7
STS
FFAR2
ZSCAN23
LOXL4
NLRP1
LYZ
F5
DOK2
NRXN3
ADM
DOC2B
NUAK2
MANSC1
VSIG2
IGF2R
NHSL2
FCER1G
ITGA7
PFKFB4
NOD2
LTK
CD300LD
WFDC1
P2RX7
CDC42EP1
VNN2
CLEC10A
CDA
TCN2
EPHB2
COL27A1
HGF
PDE4A
TMEM176B
CYP1B1
S1PR3
ADRA2C
FGL2
MPZL2
CD1D
GIMAP8
RNASE6
NLRP3
CAMK1
NAPSB
RPGRIP1
ADAMDEC1
LGALS1
LILRB4
TNFSF10
TLR6
NTNG2
TNNI3
SIGLEC14
TRH
PRRT4
IL31RA
NAGA
HSPA4L
SIX3
WIPF3
MNDA
IL17RE
MYBPH
SERINC2
CTSS
LILRA2
FBLN1
MYOF
CCR2
EDN3
SIRPB1
DPY19L2P4
KCNMB1
RNF112
ITPKA
BEST1
XKR7
RAB6B
CHAT
STX11
KCNC3
PNPLA1
CDH26
CYP2E1
SMPDL3A
MEGF9
IL15
BMP4
VSIG4
JPH4
CRYBG3
DPY19L2
RUFY4
TRIB1
PRKAG3
CTSD
S100A6
SH3TC1
NTRK3
ARAP3
RAB31
CPPED1
CLEC6A
RGS9BP
NFAM1
ANXA5
TNFSF12-TNFSF13
CREB5
RIN1
P2RY13
TYROBP
COTL1
AFF2
SCPEP1
S100A4
P2RY6
TRIM7
CYTL1
PGA3
IFNK
VNN1
JUNB
UPK3A
IGDCC4
COL2A1
IFI30
METRNL
COL14A1
PRR15
RBM47
SLC16A3
RLN3
HOXB6
TCIRG1
TMEM105
GRN
HOXA4
ADAP1
KCNK13
LDLRAD3
MMP17
TMEM170B
SIGLEC10
PRLR
PADI2
ITM2A
LILRB5
TKTL2
OSBPL11
MS4A7
HFE
PPFIBP2
PTAFR
ROBO2
CDH23
HHIP
CD300LF
FCER2
ATP12A
ZNF488
ZBED2
SYT17
PLD3
UPP1
CCR5
MLNR
UNC93B1
CSF2RA
C1orf127
SIGLEC11
F12
CERCAM
VIPR1
SBK2
GPT2
ZNF385A
CLEC4F
SLC2A9
CD300E
SALL3
CEBPB
SLC14A1
NANOS1
CXCL16
NPL
TBC1D9
TGFBI
OGDHL
MYBPHL
SMYD1
ASB2
